# Supplementary material for: Impact of Mining and Ore Processing on Soil, Drainage and Vegetation in the Zambian Copperbelt Mining Districts: A Review
Source: MDPI journal article supplement (doi:10.3390/min13030384), 2023-03-09
Supplement: s1 [file s1]

# Supplementary Materials: Impact of Mining and Ore Processing on Soil, Drainage and Vegetation in the Zambian Copperbelt Mining Districts: A Review

Bohdan Křibek \*, Imasiku Nyambe, Ondra Sracek, Martin Mihaljevič and Ilja KnésI

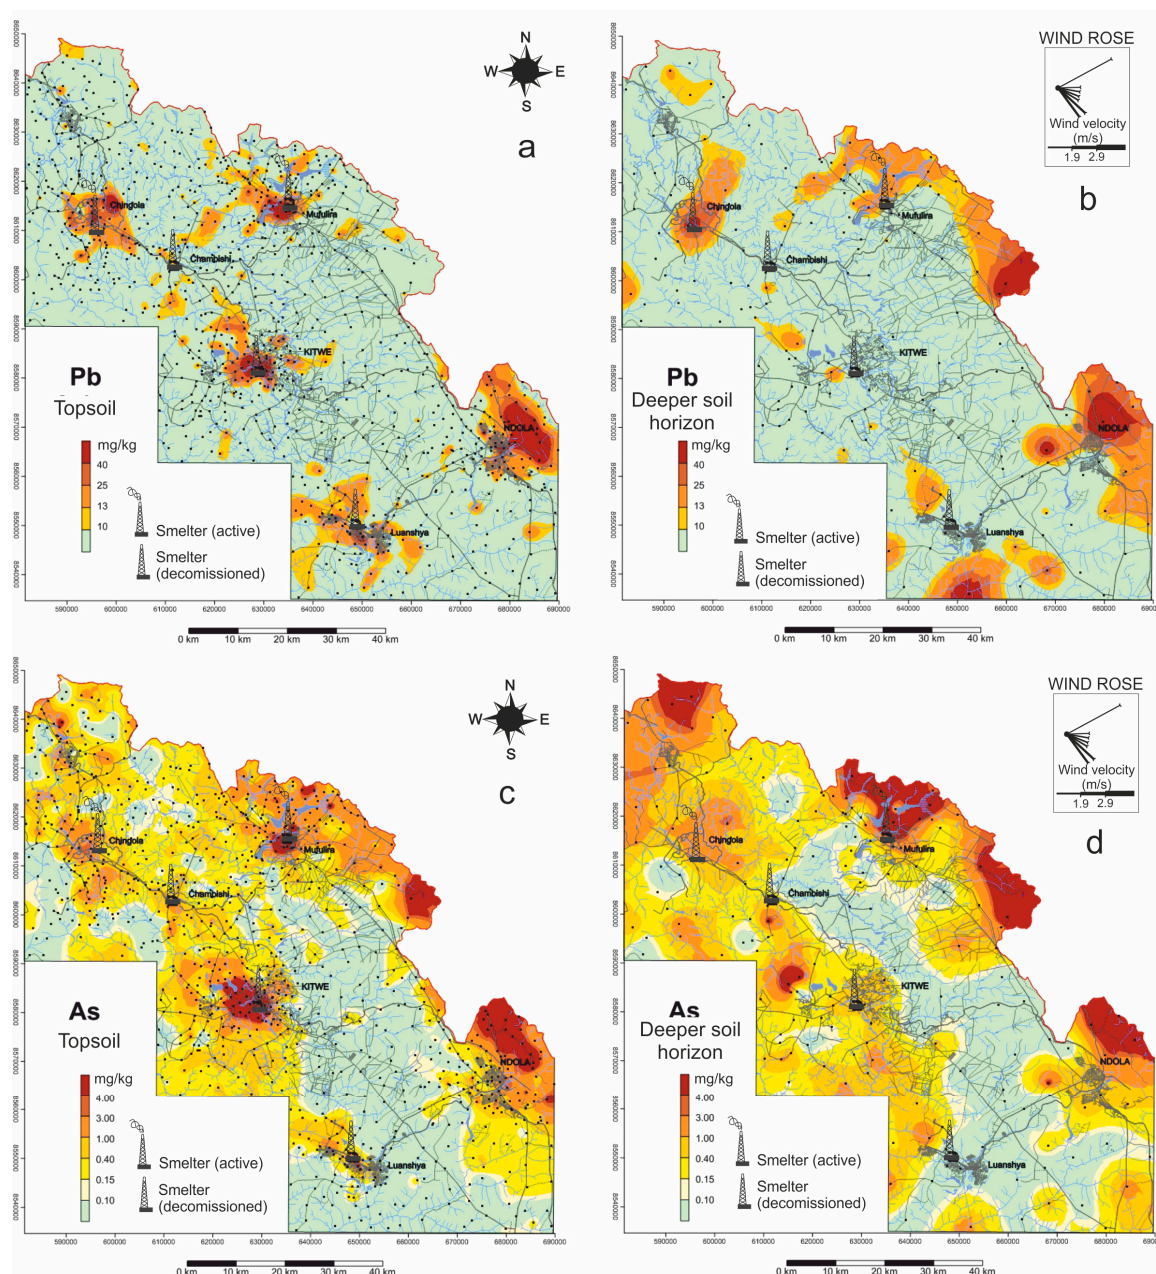

**Figure S1.** Contour map of the Pb concentrations in the topsoil (a), Contour map of the Pb concentrations in the deeper soil horizon (b), Contour map of the As concentrations in the topsoil (c), Contour map of the As in concentrations in the deeper soil horizon (d) Modified after Křibek and Nyambe [77].

**Table S1.** The location, pH,  $S_{\text{tot}}$ ,  $\text{CO}_2$  (carbonates) values and selected elements in the topsoil of the surveyed part of the Copperbelt province, Zambia. Concentrations of  $S_{\text{tot}}$ ,  $\text{CO}_2$  and Fe in wt.%, concentration of other elements in mg/kg.

| Sample | X        | Y         | pH   | $S_{\text{tot}}$ | $\text{CO}_2$ | V   | Cr | Co  | Ni | Cu   | Zn  | Pb | Fe    | As   |
|--------|----------|-----------|------|------------------|---------------|-----|----|-----|----|------|-----|----|-------|------|
| BB001  | 581780.8 | 8618535.0 | 4.19 | 0.004            | 0.020         | 18  | 16 | 2   | 5  | 79   | 12  | 4  | 0.950 | 0.26 |
| BB002  | 584165.9 | 8618820.5 | 5.93 | 0.004            | 0.061         | 39  | 26 | 7   | 6  | 118  | 33  | 4  | 1.690 | 0.70 |
| BB004  | 583918.9 | 8621892.2 | 4.31 | 0.011            | 0.039         | 24  | 16 | 2   | 5  | 115  | 9   | 4  | 1.430 | 0.48 |
| BB005  | 582225.5 | 8623352.7 | 4.31 | 0.004            | 0.045         | 18  | 14 | 6   | 2  | 102  | 11  | 4  | 1.140 | 0.70 |
| BB006  | 584271.6 | 8623107.5 | 4.35 | 0.011            | 0.044         | 13  | 13 | 6   | 2  | 67   | 10  | 4  | 1.050 | 0.84 |
| BB007  | 584314.4 | 8624499.6 | 4.31 | 0.004            | 0.065         | 31  | 21 | 15  | 6  | 83   | 23  | 4  | 2.250 | 1.62 |
| BB008  | 585753.4 | 8620191.8 | 4.50 | 0.004            | 0.012         | 14  | 9  | 2   | 2  | 49   | 6   | 4  | 0.630 | 0.30 |
| BB010  | 587121.0 | 8618405.7 | 5.29 | 0.015            | 0.034         | 10  | 12 | 14  | 5  | 307  | 20  | 4  | 0.650 | 0.22 |
| BB011  | 588166.0 | 8621945.4 | 4.25 | 0.004            | 0.018         | 15  | 13 | 2   | 2  | 61   | 8   | 4  | 0.760 | 0.04 |
| BB012  | 587624.9 | 8623227.6 | 4.28 | 0.018            | 0.044         | 22  | 19 | 6   | 5  | 154  | 13  | 4  | 1.360 | 1.14 |
| BB013  | 587064.1 | 8624445.4 | 4.29 | 0.015            | 0.043         | 10  | 10 | 6   | 2  | 151  | 10  | 4  | 0.980 | 1.17 |
| BB015  | 589739.4 | 8619090.1 | 5.06 | 0.017            | 0.044         | 52  | 34 | 11  | 6  | 235  | 28  | 4  | 2.500 | 4.19 |
| BB016  | 590871.0 | 8620486.4 | 7.22 | 0.054            | 0.234         | 29  | 26 | 14  | 7  | 407  | 20  | 4  | 1.320 | 1.47 |
| BB018  | 592418.6 | 8622176.1 | 5.71 | 0.023            | 0.035         | 4   | 7  | 13  | 2  | 358  | 17  | 4  | 0.350 | 0.37 |
| BB019  | 592964.2 | 8625400.2 | 5.72 | 0.031            | 0.082         | 4   | 12 | 7   | 2  | 327  | 12  | 4  | 0.870 | 0.48 |
| BB020  | 592276.8 | 8627113.5 | 4.98 | 0.022            | 0.066         | 21  | 17 | 8   | 2  | 261  | 12  | 4  | 1.190 | 1.03 |
| BB021  | 590824.5 | 8624679.8 | 6.52 | 0.031            | 0.152         | 16  | 22 | 13  | 2  | 377  | 19  | 4  | 1.020 | 0.66 |
| BB023  | 592447.3 | 8629345.7 | 6.39 | 0.048            | 0.214         | 4   | 11 | 15  | 2  | 497  | 24  | 4  | 0.570 | 0.33 |
| BB024  | 590599.3 | 8632330.0 | 7.46 | 0.027            | 0.052         | 16  | 17 | 9   | 2  | 282  | 12  | 4  | 1.650 | 0.37 |
| BB025  | 591082.1 | 8633407.7 | 5.81 | 0.010            | 0.023         | 11  | 14 | 2   | 2  | 72   | 7   | 4  | 1.660 | 0.04 |
| BB026  | 592808.8 | 8633549.6 | 6.13 | 0.024            | 0.073         | 26  | 22 | 7   | 2  | 203  | 13  | 4  | 2.020 | 0.40 |
| BB027  | 593968.8 | 8632917.1 | 4.84 | 0.011            | 0.048         | 16  | 17 | 5   | 2  | 73   | 5   | 4  | 1.780 | 0.26 |
| BB028  | 591065.1 | 8631068.9 | 6.76 | 0.054            | 0.151         | 14  | 19 | 15  | 2  | 621  | 24  | 4  | 1.000 | 0.54 |
| BB029  | 588768.0 | 8633349.6 | 6.67 | 0.068            | 0.321         | 89  | 98 | 82  | 7  | 1951 | 35  | 4  | 4.560 | 3.00 |
| BB030  | 588265.9 | 8631677.1 | 5.61 | 0.022            | 0.044         | 92  | 50 | 22  | 10 | 607  | 27  | 4  | 4.520 | 0.87 |
| BB031  | 587917.5 | 8629563.8 | 6.75 | 0.052            | 0.247         | 59  | 35 | 10  | 6  | 332  | 27  | 11 | 2.090 | 1.47 |
| BB033  | 588306.5 | 8627660.8 | 7.12 | 0.021            | 0.093         | 19  | 15 | 11  | 2  | 133  | 12  | 11 | 0.540 | 0.22 |
| BB034  | 593151.4 | 8619096.2 | 7.51 | 0.004            | 3.900         | 57  | 60 | 22  | 21 | 570  | 32  | 4  | 2.920 | 1.47 |
| BB036  | 592292.3 | 8619549.9 | 4.54 | 0.004            | 0.004         | 4   | 21 | 5   | 2  | 126  | 4   | 4  | 2.630 | 0.13 |
| BB037  | 592592.4 | 8620996.3 | 5.43 | 0.004            | 0.026         | 4   | 11 | 2   | 2  | 88   | 13  | 4  | 0.410 | 0.17 |
| BB038  | 592599.0 | 8621445.4 | 4.35 | 0.004            | 0.026         | 4   | 10 | 2   | 2  | 43   | 4   | 4  | 0.220 | 0.04 |
| BB039  | 593732.7 | 8627825.7 | 3.69 | 0.014            | 0.049         | 15  | 13 | 5   | 2  | 135  | 5   | 4  | 0.770 | 0.59 |
| BB041  | 590778.9 | 8628620.1 | 4.08 | 0.016            | 0.046         | 31  | 25 | 5   | 2  | 175  | 6   | 4  | 1.700 | 0.68 |
| BB042  | 590741.2 | 8630350.0 | 6.72 | 0.054            | 0.143         | 17  | 27 | 97  | 2  | 3356 | 20  | 4  | 1.580 | 1.15 |
| BB043  | 587049.6 | 8635752.3 | 6.87 | 0.004            | 0.019         | 4   | 12 | 2   | 2  | 75   | 7   | 4  | 0.400 | 0.04 |
| BB045  | 585755.5 | 8632582.5 | 6.29 | 0.018            | 0.057         | 47  | 35 | 6   | 7  | 141  | 18  | 4  | 1.550 | 0.73 |
| BB046  | 583663.2 | 8632263.4 | 7.47 | 0.039            | 0.220         | 15  | 14 | 6   | 5  | 277  | 26  | 4  | 0.770 | 0.04 |
| BB047  | 583936.8 | 8628910.5 | 5.60 | 0.021            | 0.099         | 31  | 31 | 11  | 11 | 296  | 21  | 4  | 0.890 | 0.04 |
| BB048  | 586367.6 | 8628176.6 | 4.58 | 0.020            | 0.053         | 13  | 16 | 2   | 2  | 214  | 12  | 4  | 0.820 | 0.17 |
| BB050  | 584711.5 | 8633751.8 | 8.54 | 0.052            | 0.235         | 10  | 15 | 10  | 8  | 141  | 17  | 4  | 0.570 | 0.04 |
| BB051  | 582932.4 | 8634099.9 | 7.00 | 0.016            | 0.101         | 26  | 20 | 5   | 2  | 216  | 20  | 4  | 1.340 | 0.45 |
| BB052  | 588644.2 | 8635414.7 | 7.39 | 0.034            | 0.211         | 24  | 23 | 17  | 5  | 349  | 24  | 4  | 0.970 | 0.45 |
| BB057  | 582247.0 | 8639017.7 | 7.03 | 0.021            | 0.073         | 35  | 28 | 2   | 2  | 80   | 13  | 4  | 2.060 | 0.91 |
| BB058  | 582027.5 | 8637644.2 | 6.61 | 0.014            | 0.048         | 22  | 19 | 2   | 2  | 64   | 9   | 4  | 1.240 | 0.40 |
| BB059  | 583422.3 | 8636215.5 | 8.30 | 0.021            | 0.090         | 15  | 13 | 2   | 2  | 64   | 16  | 4  | 0.440 | 0.13 |
| BB060  | 588312.7 | 8636536.9 | 8.96 | 0.028            | 4.860         | 26  | 37 | 269 | 13 | 3018 | 12  | 4  | 1.310 | 0.82 |
| BB061  | 588865.5 | 8635966.0 | 9.17 | 0.051            | 2.789         | 26  | 27 | 208 | 10 | 4211 | 8   | 4  | 1.300 | 1.43 |
| BB062  | 590199.1 | 8635322.7 | 7.58 | 0.019            | 3.001         | 30  | 32 | 197 | 12 | 3236 | 17  | 4  | 1.480 | 1.66 |
| BB064  | 589065.0 | 8629818.0 | 7.35 | 0.061            | 0.217         | 33  | 25 | 10  | 2  | 247  | 35  | 4  | 1.690 | 0.73 |
| BB065  | 589725.0 | 8631108.0 | 6.14 | 0.053            | 0.138         | 36  | 32 | 30  | 2  | 1200 | 345 | 24 | 2.210 | 1.29 |
| BB068  | 595230.0 | 8628758.0 | 4.38 | 0.012            | 0.054         | 10  | 13 | 5   | 2  | 187  | 8   | 4  | 1.320 | 0.32 |
| BB069  | 596143.0 | 8628294.0 | 4.44 | 0.020            | 0.074         | 23  | 24 | 5   | 2  | 327  | 16  | 4  | 1.920 | 0.66 |
| BB071  | 586004.0 | 8638206.0 | 6.95 | 0.020            | 0.092         | 14  | 14 | 5   | 6  | 190  | 21  | 4  | 0.640 | 0.04 |
| BB073  | 584467.0 | 8638626.0 | 6.36 | 0.012            | 0.017         | 17  | 24 | 2   | 9  | 68   | 9   | 4  | 0.790 | 0.04 |
| BB076  | 589189.0 | 8639366.0 | 5.08 | 0.017            | 0.056         | 116 | 65 | 7   | 12 | 115  | 29  | 10 | 4.440 | 6.96 |
| BB077  | 588599.0 | 8638352.0 | 7.25 | 0.053            | 0.149         | 46  | 36 | 10  | 7  | 269  | 76  | 42 | 3.260 | 5.13 |

|       |          |           |      |       |       |    |    |    |    |      |    |    |       |      |
|-------|----------|-----------|------|-------|-------|----|----|----|----|------|----|----|-------|------|
| BB079 | 590335.0 | 8637490.0 | 6.39 | 0.038 | 0.103 | 12 | 16 | 7  | 5  | 279  | 31 | 4  | 0.840 | 0.38 |
| BK001 | 595688.0 | 8627992.4 | 4.57 | 0.012 | 0.053 | 4  | 17 | 9  | 2  | 205  | 9  | 12 | 1.740 | 0.51 |
| BK002 | 598305.0 | 8628928.4 | 5.78 | 0.021 | 0.071 | 15 | 17 | 8  | 2  | 298  | 17 | 10 | 0.910 | 0.32 |
| BK003 | 601872.0 | 8631972.4 | 5.73 | 0.024 | 0.054 | 14 | 14 | 2  | 2  | 229  | 11 | 4  | 0.840 | 0.29 |
| BK005 | 602630.0 | 8635445.4 | 4.25 | 0.012 | 0.044 | 31 | 21 | 11 | 8  | 128  | 17 | 4  | 1.300 | 0.48 |
| BK006 | 604441.0 | 8638698.4 | 5.93 | 0.018 | 0.042 | 50 | 26 | 5  | 6  | 145  | 20 | 12 | 1.390 | 1.45 |
| BK007 | 588098.0 | 8636672.0 | 7.61 | 0.039 | 0.307 | 21 | 21 | 64 | 9  | 672  | 26 | 4  | 0.970 | 1.29 |
| BK008 | 585489.0 | 8641232.0 | 5.44 | 0.017 | 0.054 | 36 | 26 | 11 | 7  | 112  | 13 | 4  | 1.720 | 1.45 |
| BK009 | 584960.0 | 8642109.0 | 6.93 | 0.025 | 0.108 | 30 | 22 | 12 | 5  | 96   | 16 | 4  | 1.300 | 0.79 |
| BK010 | 586281.0 | 8643807.0 | 5.08 | 0.018 | 0.071 | 69 | 37 | 5  | 8  | 92   | 23 | 4  | 2.220 | 1.73 |
| BK011 | 584649.0 | 8640121.0 | 5.18 | 0.019 | 0.046 | 50 | 30 | 9  | 2  | 239  | 20 | 4  | 2.430 | 1.22 |
| BK012 | 582189.0 | 8640554.0 | 4.50 | 0.019 | 0.044 | 4  | 10 | 2  | 2  | 153  | 16 | 4  | 0.790 | 0.51 |
| BK013 | 587429.0 | 8639090.0 | 6.45 | 0.027 | 0.141 | 72 | 38 | 6  | 7  | 144  | 23 | 4  | 2.450 | 1.35 |
| BP001 | 602580.5 | 8618388.2 | 4.31 | 0.012 | 0.025 | 4  | 7  | 5  | 2  | 320  | 10 | 4  | 0.330 | 0.23 |
| BP002 | 603759.7 | 8619916.1 | 4.30 | 0.004 | 0.023 | 4  | 5  | 2  | 2  | 94   | 4  | 4  | 0.100 | 0.04 |
| BP003 | 604166.7 | 8621800.0 | 4.57 | 0.004 | 0.004 | 4  | 3  | 2  | 2  | 132  | 5  | 4  | 0.210 | 0.04 |
| BP004 | 606226.6 | 8620637.7 | 4.40 | 0.004 | 0.022 | 4  | 4  | 2  | 2  | 94   | 5  | 4  | 0.140 | 0.11 |
| BP007 | 597900.6 | 8618524.3 | 4.92 | 0.004 | 0.039 | 4  | 13 | 2  | 2  | 117  | 42 | 18 | 0.670 | 0.20 |
| BP008 | 597135.7 | 8618171.1 | 4.46 | 0.004 | 0.035 | 4  | 4  | 8  | 2  | 170  | 6  | 4  | 0.160 | 0.11 |
| BP010 | 596980.0 | 8621073.2 | 4.85 | 0.004 | 0.046 | 4  | 6  | 2  | 2  | 140  | 7  | 10 | 0.320 | 0.17 |
| BP011 | 595291.6 | 8621543.3 | 4.17 | 0.012 | 0.055 | 4  | 5  | 2  | 2  | 118  | 5  | 4  | 0.160 | 0.04 |
| BP012 | 595474.8 | 8619763.6 | 4.66 | 0.004 | 0.052 | 37 | 38 | 31 | 23 | 1166 | 35 | 4  | 2.250 | 0.76 |
| BP014 | 595806.1 | 8625064.0 | 4.47 | 0.014 | 0.051 | 12 | 8  | 2  | 2  | 187  | 7  | 4  | 0.870 | 0.26 |
| BP016 | 598663.6 | 8626522.7 | 4.00 | 0.015 | 0.050 | 14 | 16 | 7  | 2  | 132  | 6  | 4  | 1.060 | 0.66 |
| BP017 | 600571.4 | 8625507.7 | 4.05 | 0.017 | 0.076 | 23 | 15 | 6  | 2  | 140  | 7  | 4  | 1.150 | 0.26 |
| BP018 | 601368.8 | 8622596.1 | 3.94 | 0.016 | 0.060 | 11 | 9  | 5  | 2  | 273  | 8  | 4  | 0.530 | 0.51 |
| BP020 | 602875.1 | 8623687.0 | 4.68 | 0.004 | 0.063 | 20 | 13 | 14 | 7  | 104  | 15 | 4  | 0.960 | 0.29 |
| BP021 | 602999.9 | 8626187.4 | 5.52 | 0.019 | 0.103 | 28 | 15 | 16 | 2  | 235  | 20 | 4  | 1.060 | 0.53 |
| BP022 | 600739.0 | 8627774.5 | 3.56 | 0.021 | 0.073 | 26 | 15 | 8  | 2  | 212  | 6  | 4  | 2.230 | 0.49 |
| BP023 | 607763.3 | 8623515.2 | 4.09 | 0.017 | 0.040 | 14 | 7  | 5  | 2  | 247  | 8  | 4  | 0.450 | 0.10 |
| BP024 | 606298.7 | 8625633.3 | 3.91 | 0.012 | 0.049 | 16 | 9  | 2  | 2  | 271  | 6  | 10 | 0.600 | 0.36 |
| BP025 | 604583.0 | 8627355.9 | 3.98 | 0.015 | 0.037 | 4  | 7  | 2  | 2  | 163  | 6  | 11 | 0.360 | 0.33 |
| BP026 | 598050.0 | 8623848.8 | 4.18 | 0.019 | 0.043 | 23 | 11 | 12 | 2  | 293  | 10 | 4  | 1.100 | 0.04 |
| BP028 | 606709.5 | 8627074.8 | 4.53 | 0.013 | 0.047 | 11 | 4  | 2  | 2  | 176  | 6  | 10 | 0.350 | 0.10 |
| BP029 | 603945.0 | 8631948.0 | 4.74 | 0.018 | 0.035 | 15 | 10 | 2  | 2  | 107  | 20 | 4  | 0.750 | 0.04 |
| BP031 | 607454.0 | 8631768.0 | 4.51 | 0.004 | 0.004 | 4  | 7  | 2  | 2  | 97   | 7  | 4  | 0.350 | 0.04 |
| BP032 | 602198.0 | 8637474.0 | 4.30 | 0.014 | 0.033 | 53 | 32 | 5  | 2  | 100  | 14 | 4  | 2.390 | 0.49 |
| BP033 | 602735.0 | 8639384.0 | 4.51 | 0.016 | 0.056 | 50 | 37 | 5  | 17 | 92   | 26 | 10 | 1.440 | 1.03 |
| BP034 | 598553.0 | 8631888.0 | 3.79 | 0.029 | 0.073 | 57 | 35 | 2  | 2  | 271  | 15 | 12 | 3.040 | 2.57 |
| BP035 | 597373.0 | 8633672.0 | 4.28 | 0.040 | 0.079 | 58 | 28 | 5  | 2  | 216  | 18 | 4  | 2.150 | 0.93 |
| BP036 | 599424.0 | 8636388.0 | 5.48 | 0.004 | 0.048 | 22 | 16 | 5  | 2  | 115  | 18 | 4  | 1.020 | 0.04 |
| BP038 | 599678.0 | 8640232.0 | 4.85 | 0.004 | 0.033 | 28 | 23 | 2  | 7  | 68   | 14 | 4  | 0.920 | 0.04 |
| BP039 | 596590.0 | 8635178.0 | 5.18 | 0.012 | 0.063 | 35 | 20 | 2  | 2  | 97   | 11 | 4  | 1.320 | 0.30 |
| BP040 | 595785.0 | 8632836.0 | 4.53 | 0.045 | 0.096 | 47 | 25 | 8  | 2  | 469  | 16 | 4  | 1.990 | 1.10 |
| BP041 | 594008.0 | 8634772.0 | 4.68 | 0.022 | 0.030 | 37 | 25 | 5  | 2  | 196  | 18 | 4  | 2.020 | 0.33 |
| BP042 | 595335.0 | 8637914.0 | 4.45 | 0.012 | 0.028 | 36 | 22 | 2  | 2  | 89   | 16 | 4  | 1.330 | 0.04 |
| BP043 | 594555.0 | 8640202.0 | 5.51 | 0.020 | 0.052 | 29 | 23 | 5  | 5  | 147  | 16 | 4  | 1.030 | 0.26 |
| BP044 | 593618.0 | 8641400.0 | 5.00 | 0.012 | 0.054 | 14 | 15 | 2  | 6  | 113  | 15 | 4  | 0.300 | 0.04 |
| BP045 | 591361.0 | 8642832.0 | 5.32 | 0.016 | 0.039 | 29 | 24 | 5  | 7  | 140  | 25 | 4  | 1.260 | 0.40 |
| BP046 | 589120.0 | 8644122.0 | 6.78 | 0.016 | 0.065 | 41 | 23 | 2  | 6  | 54   | 17 | 4  | 1.250 | 0.04 |
| BP047 | 590038.0 | 8645522.0 | 5.96 | 0.036 | 0.112 | 4  | 15 | 8  | 6  | 257  | 28 | 13 | 0.320 | 0.04 |
| BP048 | 593190.0 | 8644928.0 | 5.97 | 0.031 | 0.128 | 49 | 28 | 6  | 7  | 213  | 40 | 11 | 2.070 | 1.50 |
| BP049 | 595268.0 | 8644476.0 | 5.59 | 0.024 | 0.102 | 34 | 17 | 2  | 2  | 131  | 18 | 4  | 1.360 | 1.16 |
| BP050 | 596698.0 | 8643818.0 | 5.78 | 0.010 | 0.072 | 33 | 22 | 2  | 2  | 132  | 29 | 4  | 1.330 | 0.33 |
| BP054 | 596892.0 | 8641618.0 | 6.36 | 0.021 | 0.106 | 44 | 29 | 2  | 5  | 140  | 20 | 11 | 1.750 | 0.96 |
| BP055 | 593922.0 | 8638548.0 | 6.79 | 0.022 | 0.054 | 18 | 19 | 7  | 6  | 117  | 23 | 4  | 0.910 | 0.04 |
| BP058 | 586222.0 | 8618880.0 | 5.61 | 0.010 | 0.055 | 22 | 16 | 10 | 2  | 255  | 13 | 4  | 1.030 | 0.23 |
| BP061 | 593329.0 | 8636676.0 | 6.52 | 0.022 | 0.054 | 30 | 24 | 8  | 9  | 143  | 20 | 4  | 0.850 | 0.76 |
| CS001 | 585345.0 | 8591700.0 | 5.35 | 0.031 | 0.104 | 59 | 55 | 18 | 21 | 237  | 17 | 4  | 1.610 | 0.04 |
| CS002 | 582565.0 | 8591746.0 | 5.08 | 0.019 | 0.068 | 36 | 21 | 13 | 8  | 104  | 10 | 4  | 1.230 | 0.04 |
| CS004 | 586111.0 | 8595126.0 | 5.57 | 0.014 | 0.097 | 33 | 24 | 18 | 17 | 300  | 21 | 4  | 1.150 | 0.04 |

|       |          |           |      |       |       |     |    |     |    |      |    |    |       |      |
|-------|----------|-----------|------|-------|-------|-----|----|-----|----|------|----|----|-------|------|
| CS006 | 583961.0 | 8595116.0 | 5.57 | 0.014 | 0.105 | 38  | 35 | 16  | 17 | 136  | 12 | 4  | 1.440 | 0.04 |
| CS007 | 586869.0 | 8598048.0 | 5.06 | 0.015 | 0.079 | 35  | 22 | 11  | 9  | 154  | 11 | 4  | 1.440 | 0.04 |
| CS008 | 588760.0 | 8599150.0 | 4.08 | 0.012 | 0.041 | 14  | 10 | 2   | 2  | 100  | 5  | 4  | 0.360 | 0.04 |
| CS016 | 604648.0 | 8604242.0 | 4.49 | 0.022 | 0.044 | 19  | 13 | 9   | 2  | 144  | 17 | 4  | 0.720 | 0.19 |
| CS019 | 603687.0 | 8599444.0 | 4.59 | 0.011 | 0.043 | 10  | 8  | 6   | 2  | 105  | 4  | 4  | 0.420 | 0.04 |
| CS021 | 602699.0 | 8598572.0 | 4.31 | 0.011 | 0.046 | 13  | 14 | 10  | 2  | 247  | 9  | 4  | 0.460 | 0.04 |
| CS024 | 602043.0 | 8593862.0 | 5.67 | 0.028 | 0.048 | 27  | 30 | 23  | 6  | 431  | 26 | 4  | 1.240 | 0.68 |
| CS025 | 601490.0 | 8591574.0 | 6.06 | 0.016 | 0.073 | 35  | 20 | 23  | 6  | 531  | 24 | 4  | 1.280 | 0.80 |
| CS026 | 600572.0 | 8600182.0 | 6.12 | 0.013 | 0.038 | 4   | 9  | 7   | 2  | 123  | 8  | 4  | 0.420 | 0.12 |
| CS027 | 606230.0 | 8606144.0 | 4.31 | 0.028 | 0.025 | 4   | 7  | 16  | 2  | 484  | 15 | 4  | 0.450 | 0.31 |
| CS029 | 607574.0 | 8606660.0 | 5.07 | 0.023 | 0.044 | 10  | 9  | 16  | 2  | 298  | 54 | 4  | 0.520 | 0.28 |
| CS031 | 604765.0 | 8610346.0 | 7.17 | 0.026 | 0.125 | 13  | 10 | 10  | 2  | 304  | 31 | 4  | 0.550 | 0.22 |
| CS033 | 606372.0 | 8611424.0 | 5.65 | 0.024 | 0.083 | 11  | 9  | 10  | 2  | 385  | 14 | 4  | 0.370 | 0.22 |
| CS035 | 605654.0 | 8613080.0 | 4.45 | 0.016 | 0.041 | 11  | 12 | 6   | 2  | 259  | 7  | 4  | 0.340 | 0.28 |
| CS036 | 604077.0 | 8612736.0 | 4.99 | 0.024 | 0.052 | 4   | 9  | 7   | 2  | 292  | 21 | 4  | 0.370 | 0.25 |
| CS037 | 603262.0 | 8615624.0 | 4.40 | 0.018 | 0.088 | 11  | 7  | 2   | 2  | 141  | 14 | 4  | 0.290 | 0.12 |
| CS040 | 606229.0 | 8616298.0 | 4.83 | 0.004 | 0.035 | 4   | 4  | 2   | 2  | 101  | 4  | 4  | 0.230 | 0.19 |
| CS041 | 601466.0 | 8617474.0 | 4.38 | 0.004 | 0.038 | 10  | 6  | 2   | 2  | 109  | 5  | 4  | 0.340 | 0.12 |
| CS042 | 601040.0 | 8614416.0 | 4.20 | 0.034 | 0.086 | 11  | 15 | 10  | 2  | 475  | 23 | 26 | 1.170 | 0.99 |
| CS045 | 607254.0 | 8598952.0 | 5.88 | 0.030 | 0.128 | 162 | 44 | 44  | 19 | 399  | 39 | 11 | 4.880 | 0.04 |
| CS047 | 607714.0 | 8594502.0 | 5.40 | 0.019 | 0.076 | 59  | 28 | 34  | 17 | 482  | 18 | 4  | 2.170 | 0.04 |
| CS048 | 605912.0 | 8594158.0 | 4.08 | 0.048 | 0.095 | 48  | 54 | 34  | 41 | 976  | 18 | 18 | 1.310 | 0.04 |
| CS049 | 605458.0 | 8593220.0 | 3.99 | 0.025 | 0.100 | 44  | 29 | 15  | 12 | 407  | 12 | 4  | 1.290 | 0.04 |
| CS050 | 601801.0 | 8610252.0 | 4.10 | 0.023 | 0.087 | 20  | 19 | 6   | 5  | 287  | 22 | 22 | 0.900 | 0.52 |
| CS052 | 604358.0 | 8607450.0 | 4.30 | 0.018 | 0.074 | 17  | 14 | 9   | 2  | 208  | 18 | 4  | 0.750 | 0.25 |
| CS053 | 599675.0 | 8599252.0 | 5.50 | 0.013 | 0.088 | 16  | 4  | 11  | 2  | 211  | 11 | 4  | 0.310 | 0.12 |
| CS054 | 599494.0 | 8600104.0 | 4.24 | 0.012 | 0.040 | 19  | 7  | 10  | 2  | 213  | 12 | 4  | 0.350 | 0.15 |
| CS055 | 598456.0 | 8601412.0 | 4.05 | 0.004 | 0.039 | 15  | 9  | 7   | 2  | 142  | 6  | 4  | 0.440 | 0.17 |
| CS056 | 597543.0 | 8602568.0 | 4.38 | 0.011 | 0.062 | 16  | 6  | 8   | 2  | 202  | 8  | 4  | 0.440 | 0.23 |
| CS058 | 596236.0 | 8599864.0 | 4.46 | 0.004 | 0.057 | 22  | 10 | 8   | 2  | 134  | 8  | 4  | 0.500 | 0.04 |
| CS059 | 595803.0 | 8599318.0 | 4.14 | 0.004 | 0.028 | 34  | 29 | 20  | 6  | 131  | 6  | 4  | 1.860 | 0.93 |
| CS060 | 596532.0 | 8597970.0 | 4.10 | 0.014 | 0.035 | 4   | 17 | 8   | 5  | 163  | 13 | 4  | 0.920 | 0.04 |
| CS061 | 594829.0 | 8597964.0 | 4.84 | 0.012 | 0.049 | 4   | 5  | 7   | 2  | 162  | 19 | 4  | 0.350 | 0.13 |
| CS062 | 592674.0 | 8597994.0 | 4.18 | 0.011 | 0.060 | 4   | 11 | 5   | 2  | 165  | 9  | 4  | 0.250 | 0.15 |
| CS065 | 592946.0 | 8595476.0 | 3.78 | 0.019 | 0.067 | 4   | 12 | 11  | 2  | 369  | 23 | 4  | 0.560 | 0.45 |
| CS067 | 594152.0 | 8602390.0 | 4.41 | 0.012 | 0.018 | 16  | 20 | 36  | 2  | 579  | 7  | 4  | 0.770 | 0.69 |
| CS068 | 594342.0 | 8604564.0 | 4.42 | 0.014 | 0.036 | 33  | 31 | 46  | 2  | 1622 | 15 | 11 | 2.290 | 1.08 |
| CS070 | 586332.0 | 8613978.0 | 4.56 | 0.015 | 0.043 | 46  | 43 | 11  | 8  | 154  | 17 | 11 | 2.280 | 0.04 |
| CS072 | 583991.0 | 8614578.0 | 5.03 | 0.025 | 0.071 | 31  | 23 | 18  | 8  | 538  | 24 | 4  | 1.340 | 0.11 |
| CS073 | 584548.0 | 8616644.0 | 7.12 | 0.044 | 0.628 | 21  | 16 | 66  | 9  | 4644 | 25 | 14 | 0.570 | 3.18 |
| CS074 | 585438.0 | 8617566.0 | 6.43 | 0.026 | 0.244 | 15  | 14 | 23  | 5  | 522  | 20 | 4  | 1.460 | 0.43 |
| CS077 | 588168.0 | 8617070.0 | 6.55 | 0.186 | 0.200 | 25  | 23 | 61  | 10 | 2097 | 17 | 4  | 0.990 | 0.19 |
| CS079 | 583111.0 | 8613442.0 | 4.92 | 0.024 | 0.042 | 30  | 28 | 15  | 15 | 310  | 31 | 10 | 0.900 | 0.04 |
| CS081 | 582375.0 | 8611796.0 | 4.90 | 0.013 | 0.036 | 42  | 30 | 9   | 10 | 89   | 11 | 4  | 3.590 | 0.04 |
| CS083 | 590624.0 | 8610950.0 | 5.23 | 0.011 | 0.020 | 4   | 9  | 2   | 2  | 114  | 31 | 37 | 0.520 | 0.34 |
| CS084 | 589612.0 | 8611436.0 | 5.33 | 0.025 | 0.031 | 19  | 17 | 11  | 2  | 192  | 15 | 4  | 0.810 | 0.31 |
| CS085 | 590471.0 | 8612500.0 | 7.25 | 0.172 | 0.232 | 23  | 20 | 249 | 2  | 4410 | 41 | 45 | 1.440 | 2.91 |
| CS086 | 591214.0 | 8613570.0 | 4.81 | 0.019 | 0.026 | 32  | 27 | 12  | 2  | 387  | 21 | 34 | 1.870 | 0.68 |
| CS088 | 589021.0 | 8609644.0 | 4.31 | 0.004 | 0.013 | 4   | 7  | 2   | 2  | 106  | 6  | 4  | 0.250 | 0.04 |
| CS089 | 590984.0 | 8609144.0 | 4.36 | 0.004 | 0.004 | 4   | 7  | 5   | 2  | 101  | 6  | 4  | 0.240 | 0.04 |
| CS090 | 590008.0 | 8606258.0 | 5.32 | 0.011 | 0.020 | 4   | 6  | 6   | 2  | 83   | 5  | 4  | 0.120 | 0.04 |
| CS091 | 588342.0 | 8604384.0 | 6.33 | 0.018 | 0.079 | 23  | 15 | 5   | 5  | 125  | 7  | 4  | 0.990 | 0.04 |
| CS092 | 586665.0 | 8607060.0 | 4.20 | 0.004 | 0.018 | 33  | 29 | 6   | 9  | 53   | 10 | 4  | 1.700 | 0.10 |
| CS093 | 584239.0 | 8607844.0 | 4.50 | 0.018 | 0.055 | 52  | 40 | 26  | 24 | 104  | 20 | 4  | 2.160 | 0.10 |
| CS094 | 587870.0 | 8605130.0 | 7.41 | 0.020 | 0.182 | 19  | 17 | 2   | 2  | 121  | 11 | 4  | 1.000 | 0.04 |
| CS095 | 589161.0 | 8603020.0 | 4.22 | 0.021 | 0.059 | 12  | 13 | 7   | 2  | 157  | 7  | 4  | 1.060 | 0.29 |
| CS096 | 590360.0 | 8601064.0 | 4.24 | 0.011 | 0.036 | 4   | 7  | 2   | 2  | 69   | 4  | 4  | 0.230 | 0.04 |
| CS097 | 588389.0 | 8600389.0 | 4.19 | 0.004 | 0.053 | 11  | 11 | 2   | 2  | 89   | 5  | 4  | 0.590 | 0.18 |
| CS098 | 587438.0 | 8600802.0 | 4.32 | 0.011 | 0.034 | 4   | 8  | 2   | 2  | 341  | 2  | 4  | 0.130 | 0.04 |
| CS099 | 591289.0 | 8598772.0 | 4.41 | 0.015 | 0.033 | 4   | 7  | 10  | 5  | 239  | 10 | 4  | 0.210 | 0.04 |
| CS100 | 590244.0 | 8603266.0 | 4.83 | 0.004 | 0.020 | 11  | 9  | 2   | 2  | 83   | 6  | 4  | 0.370 | 0.04 |

|       |          |           |      |       |       |    |    |     |    |       |     |     |       |       |
|-------|----------|-----------|------|-------|-------|----|----|-----|----|-------|-----|-----|-------|-------|
| CS101 | 592799.0 | 8608046.0 | 5.15 | 0.011 | 0.027 | 14 | 10 | 6   | 2  | 88    | 12  | 4   | 0.580 | 0.19  |
| CS102 | 593905.0 | 8606064.0 | 4.97 | 0.019 | 0.034 | 35 | 21 | 19  | 2  | 357   | 9   | 10  | 1.590 | 0.53  |
| CS103 | 592900.0 | 8604894.0 | 4.69 | 0.054 | 0.127 | 43 | 34 | 85  | 12 | 1871  | 55  | 63  | 2.340 | 2.64  |
| CS104 | 594488.0 | 8607394.0 | 4.62 | 0.015 | 0.081 | 16 | 9  | 6   | 2  | 183   | 11  | 4   | 0.700 | 0.37  |
| CS105 | 595833.0 | 8609898.0 | 4.94 | 0.026 | 0.096 | 18 | 14 | 7   | 2  | 223   | 14  | 15  | 1.370 | 0.72  |
| CS106 | 594903.0 | 8611208.0 | 4.74 | 0.021 | 0.093 | 15 | 14 | 13  | 2  | 345   | 49  | 37  | 1.370 | 0.73  |
| CS107 | 588978.0 | 8617546.0 | 6.49 | 0.047 | 0.365 | 40 | 21 | 76  | 11 | 4455  | 26  | 16  | 1.890 | 2.93  |
| CS108 | 590249.0 | 8616226.0 | 4.85 | 0.064 | 0.177 | 26 | 35 | 66  | 15 | 2467  | 48  | 21  | 1.320 | 0.96  |
| CS109 | 590985.0 | 8617512.0 | 5.40 | 0.033 | 0.077 | 50 | 39 | 14  | 8  | 473   | 52  | 10  | 2.110 | 0.74  |
| CS110 | 591405.0 | 8617442.0 | 6.89 | 0.109 | 2.797 | 46 | 47 | 119 | 22 | 4600  | 52  | 10  | 2.250 | 2.02  |
| CS112 | 592580.0 | 8613630.0 | 7.74 | 0.154 | 1.384 | 29 | 19 | 231 | 11 | 8307  | 61  | 4   | 1.930 | 4.31  |
| CS113 | 595144.0 | 8613534.0 | 5.58 | 0.064 | 0.149 | 23 | 26 | 63  | 2  | 1572  | 95  | 56  | 1.880 | 2.84  |
| CS114 | 594909.0 | 8614938.0 | 7.59 | 0.067 | 0.226 | 29 | 33 | 60  | 2  | 950   | 110 | 34  | 1.970 | 4.59  |
| CS115 | 594319.0 | 8615630.0 | 4.41 | 0.013 | 0.041 | 4  | 7  | 7   | 2  | 188   | 22  | 25  | 0.680 | 0.80  |
| CS116 | 595110.0 | 8616150.0 | 5.84 | 0.061 | 0.174 | 16 | 22 | 23  | 2  | 783   | 159 | 44  | 1.270 | 3.10  |
| CS117 | 596094.0 | 8616264.0 | 4.58 | 0.029 | 0.090 | 4  | 9  | 9   | 2  | 355   | 29  | 32  | 0.460 | 0.64  |
| CS118 | 597512.0 | 8616182.0 | 5.98 | 0.060 | 0.129 | 12 | 17 | 26  | 7  | 1827  | 178 | 64  | 1.410 | 2.35  |
| CS120 | 598985.0 | 8615318.0 | 7.14 | 0.040 | 0.139 | 4  | 9  | 2   | 2  | 134   | 86  | 503 | 0.630 | 0.64  |
| CS121 | 597427.0 | 8614622.0 | 4.00 | 0.012 | 0.032 | 4  | 7  | 2   | 2  | 127   | 10  | 18  | 0.460 | 0.48  |
| CS122 | 596860.0 | 8612714.0 | 4.69 | 0.017 | 0.086 | 4  | 9  | 5   | 2  | 263   | 29  | 35  | 1.110 | 0.82  |
| CS123 | 595105.0 | 8611886.0 | 6.81 | 0.093 | 0.210 | 34 | 30 | 141 | 7  | 2775  | 49  | 52  | 2.050 | 3.68  |
| CS124 | 597680.0 | 8611188.0 | 4.41 | 0.027 | 0.107 | 18 | 17 | 6   | 2  | 245   | 19  | 25  | 1.700 | 0.90  |
| CS125 | 598608.0 | 8612418.0 | 4.62 | 0.019 | 0.081 | 4  | 4  | 6   | 2  | 212   | 10  | 22  | 0.200 | 0.19  |
| CS126 | 601371.0 | 8609038.0 | 4.65 | 0.027 | 0.155 | 19 | 18 | 17  | 2  | 583   | 32  | 28  | 1.830 | 0.82  |
| CS127 | 602533.0 | 8608462.0 | 4.68 | 0.026 | 0.108 | 16 | 14 | 28  | 2  | 528   | 24  | 23  | 1.600 | 0.82  |
| CS128 | 603830.0 | 8607230.0 | 4.35 | 0.035 | 0.182 | 17 | 20 | 13  | 2  | 335   | 29  | 28  | 1.790 | 0.69  |
| CS129 | 602153.0 | 8604208.0 | 5.70 | 0.016 | 0.057 | 23 | 6  | 6   | 2  | 113   | 89  | 4   | 0.880 | 0.35  |
| CS130 | 603746.0 | 8604923.0 | 6.01 | 0.029 | 0.097 | 60 | 33 | 19  | 2  | 302   | 48  | 15  | 2.470 | 1.12  |
| CS131 | 604723.0 | 8606950.0 | 3.99 | 0.017 | 0.082 | 4  | 2  | 7   | 2  | 207   | 6   | 4   | 0.440 | 0.28  |
| CS132 | 607108.0 | 8605154.0 | 4.75 | 0.022 | 0.089 | 25 | 9  | 40  | 2  | 572   | 15  | 10  | 0.840 | 0.49  |
| CS133 | 597554.0 | 8610418.0 | 4.16 | 0.023 | 0.068 | 20 | 19 | 7   | 2  | 225   | 15  | 18  | 1.460 | 0.81  |
| CS134 | 593286.0 | 8610842.0 | 5.30 | 0.065 | 0.128 | 26 | 18 | 41  | 2  | 1171  | 29  | 21  | 1.430 | 1.73  |
| CS135 | 591850.0 | 8610116.0 | 5.95 | 0.030 | 0.073 | 17 | 16 | 7   | 2  | 156   | 49  | 21  | 0.940 | 0.40  |
| CS136 | 591664.0 | 8608844.0 | 5.14 | 0.019 | 0.057 | 39 | 29 | 21  | 2  | 417   | 21  | 12  | 1.770 | 0.57  |
| CS137 | 593655.0 | 8606544.0 | 7.02 | 0.022 | 0.101 | 33 | 20 | 14  | 2  | 354   | 24  | 4   | 1.330 | 0.37  |
| CS140 | 596440.0 | 8608986.0 | 5.35 | 0.035 | 0.085 | 20 | 22 | 8   | 2  | 205   | 121 | 26  | 1.500 | 0.84  |
| CS141 | 597988.0 | 8606464.0 | 7.12 | 0.041 | 1.024 | 26 | 25 | 179 | 12 | 3221  | 33  | 11  | 1.830 | 5.43  |
| CS157 | 603051.0 | 8605178.0 | 5.42 | 0.015 | 0.033 | 22 | 19 | 10  | 6  | 236   | 16  | 12  | 0.570 | 0.46  |
| CS158 | 602799.0 | 8606448.0 | 3.86 | 0.051 | 0.098 | 22 | 22 | 17  | 2  | 450   | 21  | 20  | 1.520 | 0.81  |
| CS159 | 608301.0 | 8604268.0 | 4.73 | 0.021 | 0.044 | 10 | 12 | 24  | 2  | 277   | 17  | 4   | 0.700 | 0.52  |
| CS160 | 588212.0 | 8613912.0 | 4.80 | 0.022 | 0.062 | 57 | 52 | 17  | 6  | 477   | 17  | 4   | 2.740 | 1.02  |
| CS164 | 584375.0 | 8600900.0 | 5.90 | 0.030 | 0.091 | 35 | 44 | 23  | 27 | 297   | 17  | 10  | 1.340 | 0.16  |
| CS165 | 591540.0 | 8603096.0 | 5.13 | 0.070 | 0.025 | 36 | 42 | 260 | 25 | 10080 | 14  | 4   | 1.940 | 0.43  |
| CK001 | 594882.0 | 8600738.0 | 4.37 | 0.020 | 0.020 | 33 | 31 | 72  | 9  | 1121  | 12  | 4   | 2.210 | 0.82  |
| CK002 | 583300.0 | 8597209.0 | 6.93 | 0.035 | 0.200 | 21 | 10 | 10  | 2  | 241   | 13  | 4   | 0.510 | 0.18  |
| CK003 | 594073.0 | 8606530.0 | 6.70 | 0.048 | 0.070 | 25 | 14 | 19  | 2  | 469   | 27  | 20  | 1.050 | 0.89  |
| CK005 | 595548.0 | 8608098.0 | 6.33 | 0.036 | 0.050 | 26 | 17 | 27  | 2  | 553   | 25  | 20  | 1.390 | 1.18  |
| CK006 | 596668.0 | 8608006.0 | 5.23 | 0.042 | 0.060 | 25 | 17 | 16  | 2  | 444   | 25  | 20  | 1.430 | 1.00  |
| CK007 | 597848.0 | 8607532.0 | 6.35 | 0.336 | 0.810 | 27 | 16 | 123 | 5  | 6141  | 28  | 13  | 2.010 | 5.51  |
| CK008 | 598183.0 | 8605447.0 | 4.46 | 0.004 | 0.020 | 20 | 9  | 6   | 2  | 161   | 10  | 4   | 0.690 | 0.25  |
| CK009 | 597921.0 | 8604528.0 | 7.21 | 0.036 | 0.120 | 26 | 10 | 24  | 2  | 524   | 21  | 4   | 0.750 | 0.54  |
| CK010 | 597815.0 | 8603354.0 | 6.81 | 0.048 | 0.130 | 29 | 13 | 60  | 2  | 1155  | 21  | 4   | 1.000 | 1.28  |
| CK011 | 594692.0 | 8603150.0 | 7.28 | 0.086 | 1.350 | 34 | 21 | 203 | 11 | 3698  | 35  | 10  | 2.010 | 5.43  |
| CK012 | 598075.0 | 8607038.0 |      | 0.020 | 0.040 | 20 | 11 | 7   | 2  | 266   | 12  | 17  | 1.580 | 1.07  |
| IB001 | 662352.9 | 8580710.3 | 4.47 | 0.004 | 0.030 | 13 | 19 | 2   | 2  | 44    | 9   | 4   | 0.740 | 0.04  |
| IB003 | 660806.3 | 8577143.2 | 5.17 | 0.004 | 0.050 | 4  | 7  | 2   | 2  | 44    | 6   | 4   | 0.160 | 0.04  |
| IB005 | 659301.8 | 8581738.7 | 4.58 | 0.004 | 0.020 | 4  | 9  | 2   | 5  | 24    | 6   | 4   | 0.300 | 0.04  |
| IB006 | 657975.1 | 8581427.7 | 4.80 | 0.004 | 0.010 | 11 | 8  | 2   | 2  | 60    | 8   | 4   | 0.260 | 0.04  |
| IB007 | 654361.6 | 8580545.0 | 5.11 | 0.014 | 0.090 | 4  | 9  | 2   | 2  | 105   | 12  | 4   | 0.310 | 0.129 |
| IB009 | 653510.8 | 8577318.8 | 5.55 | 0.010 | 0.050 | 11 | 8  | 2   | 2  | 32    | 5   | 4   | 0.210 | 0.04  |
| IB011 | 655296.1 | 8576274.1 | 5.73 | 0.004 | 0.004 | 4  | 5  | 2   | 2  | 16    | 5   | 4   | 0.180 | 0.04  |

|       |          |           |      |       |       |    |    |    |    |     |     |    |       |       |
|-------|----------|-----------|------|-------|-------|----|----|----|----|-----|-----|----|-------|-------|
| IB012 | 650695.6 | 8582472.6 | 5.75 | 0.016 | 0.070 | 4  | 16 | 2  | 6  | 72  | 13  | 4  | 0.810 | 0.04  |
| IB015 | 656946.0 | 8584412.9 | 5.64 | 0.015 | 0.050 | 4  | 11 | 5  | 5  | 84  | 12  | 4  | 0.610 | 0.04  |
| IB016 | 650081.4 | 8578180.4 | 5.11 | 0.013 | 0.020 | 4  | 8  | 2  | 2  | 69  | 8   | 4  | 0.290 | 0.189 |
| IB017 | 647377.8 | 8579035.7 | 5.71 | 0.013 | 0.020 | 22 | 22 | 5  | 2  | 67  | 15  | 4  | 1.190 | 0.259 |
| IB019 | 642894.4 | 8575625.2 | 4.65 | 0.011 | 0.004 | 10 | 12 | 5  | 2  | 118 | 8   | 4  | 0.540 | 0.04  |
| IB020 | 636795.5 | 8588465.1 | 5.05 | 0.012 | 0.120 | 10 | 17 | 6  | 2  | 208 | 10  | 4  | 0.540 | 0.04  |
| IB022 | 637403.1 | 8585984.5 | 4.44 | 0.004 | 0.010 | 4  | 10 | 2  | 2  | 173 | 7   | 4  | 0.320 | 0.04  |
| IB025 | 635983.0 | 8579504.2 | 5.70 | 0.004 | 0.020 | 31 | 27 | 13 | 2  | 221 | 11  | 4  | 1.440 | 0.04  |
| IB026 | 636239.6 | 8583203.0 | 4.85 | 0.027 | 0.030 | 24 | 27 | 17 | 6  | 358 | 119 | 26 | 1.280 | 0.389 |
| IB028 | 642478.2 | 8589359.2 | 5.26 | 0.004 | 0.004 | 4  | 5  | 2  | 2  | 68  | 8   | 4  | 0.230 | 0.04  |
| IB029 | 639906.0 | 8590226.1 | 5.24 | 0.011 | 0.050 | 4  | 8  | 2  | 2  | 97  | 6   | 4  | 0.240 | 0.189 |
| IK001 | 647396.0 | 8563214.0 | 5.18 | 0.004 | 0.020 | 4  | 10 | 2  | 2  | 63  | 6   | 4  | 0.390 | 0.04  |
| IK003 | 642691.0 | 8563499.0 | 4.92 | 0.019 | 0.060 | 4  | 10 | 2  | 2  | 50  | 7   | 4  | 0.350 | 0.04  |
| IK005 | 644611.0 | 8567500.0 | 4.88 | 0.004 | 0.004 | 14 | 28 | 2  | 6  | 94  | 9   | 4  | 0.340 | 0.04  |
| IK006 | 646327.0 | 8567884.0 | 4.92 | 0.004 | 0.030 | 15 | 15 | 2  | 7  | 80  | 12  | 4  | 0.390 | 0.04  |
| IK007 | 646772.0 | 8575588.0 | 4.81 | 0.004 | 0.030 | 23 | 15 | 2  | 2  | 67  | 10  | 4  | 0.880 | 0.04  |
| IK009 | 636631.0 | 8569250.0 | 4.82 | 0.013 | 0.060 | 17 | 11 | 5  | 2  | 177 | 9   | 10 | 0.740 | 0.259 |
| IK010 | 637242.0 | 8573541.0 | 5.22 | 0.020 | 0.004 | 25 | 36 | 8  | 2  | 147 | 14  | 4  | 2.100 | 0.129 |
| IK012 | 638255.0 | 8576137.0 | 6.80 | 0.019 | 0.010 | 23 | 19 | 18 | 5  | 274 | 33  | 11 | 1.000 | 0.319 |
| IK013 | 645171.0 | 8573458.0 | 6.14 | 0.018 | 0.260 | 29 | 15 | 11 | 6  | 141 | 15  | 10 | 1.320 | 0.04  |
| IK014 | 641703.0 | 8571089.0 | 4.35 | 0.015 | 0.730 | 13 | 11 | 7  | 2  | 142 | 10  | 4  | 0.300 | 0.04  |
| IK015 | 641683.0 | 8568817.0 | 4.94 | 0.015 | 0.060 | 10 | 8  | 7  | 2  | 107 | 8   | 4  | 0.260 | 0.04  |
| IK016 | 639667.0 | 8577694.0 | 4.30 | 0.012 | 0.030 | 34 | 16 | 13 | 7  | 205 | 10  | 4  | 1.030 | 0.04  |
| IK018 | 641552.0 | 8579698.0 | 4.51 | 0.010 | 0.030 | 20 | 24 | 8  | 2  | 164 | 8   | 4  | 1.050 | 0.04  |
| IK019 | 637743.0 | 8580688.0 | 6.25 | 0.018 | 0.004 | 47 | 35 | 15 | 11 | 240 | 23  | 11 | 1.870 | 0.119 |
| IK021 | 642610.0 | 8583276.0 | 5.04 | 0.004 | 0.020 | 11 | 11 | 6  | 5  | 48  | 6   | 15 | 0.280 | 0.04  |
| IK023 | 644206.0 | 8587427.0 | 5.07 | 0.004 | 0.430 | 15 | 7  | 5  | 2  | 52  | 7   | 12 | 0.490 | 0.04  |
| IK024 | 646328.0 | 8583153.0 | 4.58 | 0.004 | 0.004 | 16 | 14 | 6  | 2  | 52  | 8   | 4  | 0.550 | 0.04  |
| IK025 | 650116.0 | 8585666.0 | 5.19 | 0.013 | 0.020 | 22 | 13 | 7  | 5  | 68  | 13  | 4  | 0.680 | 0.04  |
| IK026 | 653833.0 | 8587206.0 | 5.54 | 0.019 | 0.040 | 18 | 12 | 5  | 6  | 104 | 13  | 4  | 0.530 | 0.04  |
| IM001 | 659016.8 | 8564021.9 | 5.85 | 0.004 | 0.010 | 10 | 12 | 2  | 2  | 39  | 7   | 4  | 0.390 | 0.04  |
| IM002 | 662497.5 | 8564683.6 | 5.62 | 0.004 | 0.004 | 15 | 12 | 2  | 2  | 45  | 9   | 4  | 0.290 | 0.04  |
| IM003 | 654966.6 | 8565010.5 | 4.88 | 0.004 | 0.020 | 4  | 9  | 2  | 2  | 15  | 4   | 4  | 0.370 | 0.04  |
| IM006 | 651118.3 | 8562724.0 | 5.18 | 0.004 | 0.004 | 12 | 13 | 2  | 6  | 72  | 11  | 4  | 0.580 | 0.04  |
| IM007 | 657476.3 | 8567784.0 | 5.11 | 0.004 | 0.050 | 13 | 16 | 2  | 2  | 77  | 10  | 4  | 0.770 | 0.04  |
| IM008 | 661589.0 | 8568190.5 | 5.44 | 0.012 | 0.020 | 18 | 9  | 2  | 2  | 78  | 11  | 4  | 0.400 | 0.129 |
| IM010 | 661360.6 | 8571305.8 | 5.42 | 0.014 | 0.120 | 21 | 16 | 2  | 7  | 74  | 13  | 12 | 0.770 | 0.150 |
| IM011 | 656440.1 | 8570146.0 | 5.31 | 0.012 | 0.020 | 16 | 15 | 2  | 8  | 74  | 9   | 10 | 0.550 | 0.04  |
| IM012 | 656641.2 | 8572932.8 | 4.63 | 0.004 | 0.010 | 16 | 10 | 2  | 2  | 34  | 5   | 4  | 0.220 | 0.04  |
| IM013 | 654120.4 | 8566582.0 | 4.26 | 0.004 | 0.004 | 11 | 18 | 2  | 6  | 34  | 7   | 4  | 0.160 | 0.04  |
| IM014 | 650175.7 | 8567906.3 | 4.75 | 0.004 | 0.140 | 17 | 16 | 2  | 5  | 54  | 8   | 4  | 0.620 | 0.04  |
| IM015 | 652050.9 | 8570852.4 | 4.57 | 0.004 | 0.120 | 13 | 12 | 2  | 7  | 41  | 6   | 4  | 0.370 | 0.04  |
| IM017 | 650328.5 | 8572232.1 | 4.45 | 0.012 | 0.090 | 10 | 5  | 2  | 5  | 105 | 6   | 4  | 0.250 | 0.04  |
| IM018 | 661575.6 | 8587272.1 | 5.00 | 0.004 | 0.040 | 15 | 6  | 2  | 5  | 25  | 5   | 4  | 0.180 | 0.04  |
| IM019 | 662686.1 | 8585008.3 | 4.40 | 0.004 | 0.050 | 18 | 11 | 2  | 2  | 43  | 5   | 4  | 0.620 | 0.479 |
| IM020 | 658724.6 | 8587132.2 | 5.57 | 0.004 | 0.040 | 17 | 10 | 6  | 5  | 74  | 11  | 4  | 0.540 | 0.150 |
| IM021 | 655719.5 | 8585777.4 | 4.80 | 0.018 | 0.030 | 33 | 16 | 7  | 5  | 135 | 18  | 11 | 1.460 | 0.239 |
| IM023 | 656977.0 | 8588566.2 | 4.34 | 0.004 | 0.020 | 39 | 17 | 8  | 6  | 132 | 18  | 10 | 1.430 | 0.270 |
| IM024 | 647676.4 | 8590267.1 | 4.22 | 0.004 | 0.030 | 15 | 9  | 2  | 6  | 36  | 10  | 4  | 0.320 | 0.04  |
| KA001 | 635459.8 | 8585560.7 | 4.66 | 0.004 | 0.040 | 4  | 10 | 7  | 2  | 149 | 7   | 4  | 0.630 | 2.37  |
| KA002 | 633565.2 | 8584557.5 | 6.03 | 0.011 | 0.060 | 23 | 28 | 16 | 2  | 324 | 25  | 10 | 1.090 | 2.13  |
| KA003 | 632450.8 | 8586091.9 | 5.07 | 0.004 | 0.060 | 29 | 31 | 10 | 2  | 152 | 33  | 13 | 2.060 | 1.16  |
| KA004 | 632960.8 | 8587514.9 | 6.76 | 0.100 | 0.080 | 24 | 21 | 17 | 5  | 247 | 89  | 20 | 0.880 | 0.87  |
| KA006 | 634620.0 | 8586508.3 | 5.76 | 0.011 | 0.050 | 21 | 20 | 6  | 2  | 133 | 9   | 4  | 1.580 | 0.71  |
| KA007 | 633974.9 | 8587899.1 | 6.44 | 0.041 | 0.100 | 47 | 40 | 33 | 6  | 271 | 105 | 70 | 2.370 | 1.03  |
| KA008 | 631354.0 | 8585649.5 | 4.66 | 0.010 | 0.080 | 23 | 19 | 10 | 2  | 262 | 11  | 4  | 0.860 | 0.81  |
| KA009 | 631371.5 | 8587679.1 | 5.97 | 0.014 | 0.080 | 43 | 49 | 13 | 7  | 243 | 191 | 25 | 2.390 | 0.83  |
| KA010 | 632512.0 | 8589435.0 | 5.06 | 0.017 | 0.100 | 40 | 22 | 15 | 2  | 316 | 36  | 4  | 1.200 | 1.14  |
| KA012 | 634454.0 | 8589595.4 | 5.97 | 0.017 | 0.090 | 28 | 28 | 13 | 6  | 136 | 18  | 4  | 1.580 | 0.25  |
| KA013 | 631110.8 | 8589460.8 | 5.19 | 0.004 | 0.030 | 22 | 10 | 9  | 2  | 143 | 9   | 4  | 0.650 | 0.38  |
| KA014 | 629638.8 | 8588795.1 | 4.43 | 0.012 | 0.050 | 37 | 44 | 10 | 8  | 235 | 15  | 4  | 2.400 | 0.15  |

|       |          |           |      |       |       |    |     |     |    |       |     |     |       |        |
|-------|----------|-----------|------|-------|-------|----|-----|-----|----|-------|-----|-----|-------|--------|
| KA015 | 627122.9 | 8589114.1 | 6.68 | 0.024 | 0.040 | 34 | 19  | 79  | 12 | 439   | 7   | 4   | 1.670 | 0.16   |
| KA016 | 629953.1 | 8586706.0 | 5.24 | 0.012 | 0.040 | 19 | 13  | 14  | 5  | 262   | 10  | 4   | 0.690 | 0.04   |
| KA018 | 633428.4 | 8583868.8 | 5.47 | 0.013 | 0.050 | 12 | 12  | 22  | 2  | 443   | 13  | 4   | 0.600 | 0.54   |
| KA021 | 634909.5 | 8583543.6 | 6.95 | 0.084 | 0.550 | 30 | 32  | 56  | 13 | 1312  | 312 | 54  | 1.790 | 1.53   |
| KA025 | 633114.9 | 8582032.0 | 7.32 | 0.038 | 4.560 | 31 | 32  | 210 | 9  | 1038  | 27  | 4   | 1.560 | 1.96   |
| KA026 | 631900.6 | 8581118.7 | 7.44 | 0.093 | 8.360 | 40 | 43  | 445 | 20 | 7831  | 76  | 36  | 1.890 | 4.14   |
| KA027 | 633604.7 | 8580649.6 | 5.80 | 0.014 | 0.050 | 13 | 18  | 17  | 2  | 450   | 7   | 4   | 0.990 | 0.59   |
| KA028 | 634274.3 | 8581227.9 | 4.45 | 0.004 | 0.020 | 28 | 46  | 10  | 6  | 219   | 7   | 4   | 2.440 | 0.04   |
| KA029 | 634855.3 | 8579792.8 | 4.38 | 0.004 | 0.030 | 15 | 8   | 11  | 2  | 351   | 6   | 4   | 0.480 | 0.59   |
| KA032 | 632427.8 | 8578566.6 | 7.01 | 0.056 | 0.170 | 63 | 40  | 53  | 8  | 1015  | 68  | 15  | 2.860 | 1.43   |
| KA033 | 633315.0 | 8577402.1 | 5.99 | 0.030 | 0.150 | 27 | 15  | 38  | 2  | 1460  | 33  | 12  | 1.240 | 2.28   |
| KA034 | 633810.0 | 8578485.1 | 5.25 | 0.016 | 0.070 | 25 | 13  | 25  | 2  | 765   | 14  | 4   | 0.920 | 0.85   |
| KA036 | 635362.9 | 8576561.6 | 4.67 | 0.004 | 0.070 | 16 | 7   | 13  | 2  | 438   | 10  | 4   | 0.600 | 0.65   |
| KA037 | 632074.3 | 8583009.9 | 5.70 | 0.050 | 0.130 | 21 | 14  | 47  | 5  | 1245  | 37  | 16  | 0.900 | 1.81   |
| KA038 | 630559.3 | 8584483.4 | 6.34 | 0.027 | 0.060 | 21 | 17  | 38  | 2  | 901   | 60  | 28  | 0.870 | 1.60   |
| KA039 | 630640.9 | 8583916.7 | 7.33 | 0.101 | 0.310 | 33 | 56  | 116 | 19 | 1771  | 318 | 216 | 2.170 | 5.20   |
| KA040 | 632306.5 | 8583124.0 | 6.99 | 0.040 | 0.680 | 44 | 30  | 163 | 6  | 2399  | 49  | 12  | 2.040 | 2.97   |
| KA041 | 631994.6 | 8577669.7 | 4.53 | 0.035 | 0.030 | 28 | 18  | 29  | 2  | 1359  | 12  | 4   | 1.320 | 2.59   |
| KA042 | 631546.6 | 8579672.0 | 7.27 | 0.453 | 0.290 | 26 | 24  | 100 | 6  | 2680  | 105 | 25  | 1.300 | 4.30   |
| KA044 | 631014.8 | 8579771.4 | 6.31 | 0.358 | 0.480 | 58 | 46  | 181 | 10 | 6009  | 118 | 51  | 2.900 | 7.55   |
| KA046 | 630580.6 | 8581461.9 | 4.90 | 0.277 | 0.170 | 36 | 33  | 313 | 12 | 7838  | 142 | 99  | 2.550 | 14.84  |
| KA047 | 629549.8 | 8582329.4 | 5.36 | 0.187 | 0.110 | 35 | 30  | 376 | 9  | 14620 | 97  | 56  | 2.730 | 20.96  |
| KA048 | 627671.6 | 8581709.4 | 5.05 | 0.164 | 0.150 | 42 | 37  | 409 | 21 | 27410 | 148 | 131 | 3.030 | 38.72  |
| KA050 | 629279.9 | 8583177.7 | 6.14 | 0.104 | 0.330 | 30 | 27  | 213 | 14 | 7910  | 105 | 60  | 1.540 | 7.84   |
| KA051 | 628976.1 | 8584159.7 | 6.54 | 0.033 | 0.230 | 25 | 23  | 60  | 2  | 1285  | 19  | 11  | 1.460 | 2.23   |
| KA052 | 628559.0 | 8585197.0 | 7.40 | 0.157 | 1.510 | 34 | 32  | 237 | 11 | 3093  | 72  | 37  | 1.770 | 4.90   |
| KA055 | 626380.8 | 8587385.8 | 5.54 | 0.034 | 0.100 | 50 | 42  | 66  | 6  | 1833  | 33  | 28  | 2.450 | 2.31   |
| KA056 | 626836.8 | 8586424.5 | 5.10 | 0.023 | 0.070 | 30 | 17  | 33  | 2  | 1069  | 25  | 10  | 1.140 | 4.33   |
| KA057 | 627935.3 | 8586992.2 | 5.78 | 0.015 | 0.060 | 27 | 25  | 12  | 2  | 454   | 18  | 4   | 1.250 | 0.62   |
| KA058 | 626871.6 | 8583248.4 | 6.72 | 0.117 | 0.320 | 67 | 595 | 384 | 42 | 18770 | 450 | 480 | 3.970 | 254.90 |
| KA059 | 625493.0 | 8581976.6 | 5.50 | 0.041 | 0.110 | 15 | 21  | 156 | 14 | 7612  | 66  | 38  | 1.230 | 9.66   |
| KA060 | 624265.6 | 8581295.6 | 4.56 | 0.039 | 0.060 | 28 | 19  | 90  | 2  | 3930  | 34  | 24  | 1.370 | 7.36   |
| KA061 | 621184.9 | 8580815.3 | 5.58 | 0.037 | 0.110 | 10 | 7   | 15  | 2  | 718   | 24  | 4   | 0.230 | 0.50   |
| KA062 | 619765.9 | 8581339.1 | 5.14 | 0.018 | 0.090 | 18 | 11  | 46  | 2  | 1660  | 22  | 10  | 0.610 | 2.15   |
| KA063 | 620075.9 | 8583536.0 | 4.96 | 0.015 | 0.090 | 40 | 27  | 42  | 16 | 1037  | 12  | 4   | 1.340 | 0.04   |
| KA065 | 619535.6 | 8585370.3 | 7.27 | 0.059 | 2.020 | 30 | 25  | 134 | 12 | 1053  | 25  | 4   | 1.560 | 2.23   |
| KA066 | 619389.3 | 8586371.4 | 5.69 | 0.058 | 0.150 | 62 | 35  | 45  | 17 | 1141  | 28  | 25  | 2.080 | 1.72   |
| KA067 | 619934.2 | 8588423.9 | 5.40 | 0.023 | 0.070 | 23 | 15  | 33  | 7  | 1291  | 19  | 4   | 1.850 | 0.84   |
| KA068 | 620381.6 | 8589822.0 | 5.85 | 0.050 | 0.210 | 82 | 43  | 63  | 10 | 2261  | 49  | 21  | 3.980 | 1.74   |
| KA069 | 626041.5 | 8590078.7 | 5.05 | 0.038 | 0.160 | 19 | 18  | 72  | 6  | 1800  | 68  | 49  | 0.800 | 2.91   |
| KA070 | 616603.0 | 8582573.0 | 7.19 | 0.163 | 0.590 | 69 | 48  | 152 | 14 | 2464  | 119 | 17  | 2.930 | 2.44   |
| KA071 | 617394.2 | 8581368.6 | 5.89 | 0.037 | 0.090 | 25 | 16  | 33  | 6  | 552   | 31  | 4   | 0.660 | 0.67   |
| KA072 | 617430.6 | 8580705.0 | 4.29 | 0.021 | 0.060 | 19 | 13  | 20  | 2  | 661   | 13  | 4   | 0.920 | 0.42   |
| KA073 | 619452.9 | 8579474.4 | 6.07 | 0.030 | 0.070 | 29 | 17  | 17  | 2  | 572   | 26  | 4   | 0.970 | 0.77   |
| KA074 | 619803.6 | 8579726.4 | 5.29 | 0.018 | 0.070 | 23 | 14  | 19  | 2  | 588   | 34  | 4   | 0.830 | 0.74   |
| KA077 | 624225.4 | 8579509.8 | 4.94 | 0.086 | 0.160 | 20 | 20  | 134 | 9  | 6604  | 94  | 45  | 1.050 | 5.51   |
| KB001 | 633832.3 | 8575423.2 | 4.69 | 0.010 | 0.060 | 22 | 15  | 16  | 2  | 453   | 9   | 4   | 0.780 | 0.59   |
| KB004 | 631082.1 | 8573668.0 | 4.39 | 0.004 | 0.030 | 15 | 4   | 8   | 2  | 306   | 5   | 4   | 0.240 | 0.28   |
| KB006 | 628428.3 | 8572560.5 | 7.25 | 0.017 | 0.090 | 15 | 8   | 10  | 2  | 319   | 10  | 4   | 0.560 | 0.67   |
| KB007 | 625912.6 | 8569564.7 | 4.27 | 0.004 | 0.050 | 13 | 7   | 7   | 2  | 221   | 5   | 4   | 0.360 | 0.57   |
| KB009 | 628465.4 | 8571234.6 | 4.87 | 0.016 | 0.100 | 19 | 5   | 7   | 2  | 284   | 7   | 4   | 0.580 | 0.53   |
| KB010 | 629583.3 | 8568697.0 | 5.49 | 0.023 | 0.120 | 31 | 32  | 19  | 2  | 497   | 15  | 4   | 1.200 | 1.09   |
| KB013 | 627914.0 | 8563247.4 | 4.53 | 0.012 | 0.070 | 4  | 10  | 6   | 2  | 177   | 5   | 4   | 0.640 | 0.53   |
| KB015 | 626725.4 | 8565308.5 | 4.88 | 0.004 | 0.020 | 15 | 8   | 2   | 2  | 71    | 7   | 4   | 0.450 | 0.38   |
| KB016 | 625250.9 | 8566664.7 | 4.81 | 0.004 | 0.040 | 16 | 6   | 6   | 2  | 164   | 14  | 4   | 0.260 | 0.18   |
| KB020 | 621080.9 | 8564637.8 | 4.11 | 0.019 | 0.120 | 4  | 4   | 7   | 2  | 560   | 11  | 15  | 0.290 | 0.47   |
| KB023 | 622404.8 | 8568807.2 | 8.04 | 0.061 | 0.280 | 4  | 5   | 7   | 2  | 561   | 10  | 19  | 0.290 | 0.49   |
| KB024 | 619185.7 | 8568965.2 | 4.08 | 0.020 | 0.070 | 4  | 3   | 7   | 2  | 236   | 7   | 4   | 0.180 | 0.32   |
| KB027 | 620350.4 | 8570627.6 | 4.54 | 0.018 | 0.070 | 4  | 5   | 10  | 2  | 355   | 8   | 4   | 0.490 | 0.61   |
| KB029 | 618967.4 | 8573151.3 | 4.46 | 0.016 | 0.080 | 23 | 14  | 15  | 2  | 336   | 9   | 4   | 1.160 | 0.22   |
| KB030 | 617214.5 | 8573257.7 | 4.42 | 0.012 | 0.080 | 36 | 36  | 20  | 10 | 414   | 10  | 4   | 1.560 | 0.04   |

|       |          |           |      |       |        |     |     |     |    |       |     |    |       |       |
|-------|----------|-----------|------|-------|--------|-----|-----|-----|----|-------|-----|----|-------|-------|
| KB032 | 622099.3 | 8574912.4 | 6.43 | 0.021 | 0.110  | 12  | 11  | 17  | 2  | 541   | 12  | 4  | 0.660 | 1.05  |
| KB033 | 617547.8 | 8568042.4 | 4.15 | 0.004 | 0.080  | 4   | 5   | 5   | 2  | 181   | 4   | 4  | 0.200 | 0.26  |
| KB034 | 619425.9 | 8564996.1 | 4.26 | 0.019 | 0.090  | 4   | 4   | 5   | 2  | 133   | 6   | 4  | 0.250 | 0.32  |
| KB035 | 615620.2 | 8571557.0 | 5.00 | 0.018 | 0.100  | 54  | 18  | 16  | 2  | 293   | 10  | 4  | 2.270 | 1.11  |
| KB036 | 614123.9 | 8568126.0 | 5.31 | 0.013 | 0.090  | 11  | 9   | 7   | 2  | 143   | 6   | 4  | 0.790 | 0.59  |
| KB038 | 615151.7 | 8565586.2 | 4.40 | 0.015 | 0.060  | 4   | 5   | 5   | 2  | 97    | 5   | 4  | 0.220 | 0.16  |
| KB040 | 613299.9 | 8563105.6 | 5.49 | 0.004 | 0.060  | 21  | 14  | 6   | 5  | 73    | 14  | 4  | 1.160 | 0.40  |
| KB042 | 610620.4 | 8565758.5 | 5.67 | 0.018 | 0.150  | 106 | 27  | 20  | 9  | 146   | 14  | 4  | 3.170 | 0.12  |
| KB044 | 609658.7 | 8566735.7 | 5.99 | 0.027 | 0.230  | 227 | 151 | 60  | 34 | 252   | 23  | 4  | 7.130 | 0.26  |
| KB045 | 618938.0 | 8578221.2 | 4.60 | 0.015 | 0.050  | 4   | 5   | 15  | 2  | 526   | 8   | 4  | 0.300 | 1.07  |
| KB046 | 618164.9 | 8576334.1 | 5.16 | 0.024 | 0.080  | 106 | 28  | 34  | 12 | 600   | 20  | 4  | 2.160 | 0.14  |
| KB048 | 619067.5 | 8575316.2 | 4.64 | 0.019 | 0.090  | 33  | 39  | 19  | 15 | 419   | 12  | 4  | 1.510 | 0.11  |
| KB049 | 617463.2 | 8575365.2 | 4.64 | 0.012 | 0.040  | 28  | 28  | 13  | 21 | 272   | 8   | 4  | 0.920 | 0.04  |
| KB050 | 616237.7 | 8573375.5 | 4.90 | 0.025 | 0.100  | 93  | 34  | 28  | 15 | 318   | 45  | 12 | 3.340 | 0.04  |
| KB051 | 613639.6 | 8570262.5 | 5.44 | 0.004 | 0.050  | 50  | 28  | 9   | 5  | 77    | 13  | 4  | 1.810 | 0.30  |
| KB054 | 610212.8 | 8570379.3 | 4.35 | 0.020 | 0.090  | 65  | 40  | 14  | 16 | 178   | 9   | 4  | 2.180 | 0.32  |
| KB058 | 608844.3 | 8573294.1 | 4.77 | 0.023 | 0.140  | 150 | 53  | 35  | 25 | 340   | 9   | 4  | 5.880 | 0.04  |
| KB060 | 613416.4 | 8575334.4 | 4.49 | 0.017 | 0.080  | 46  | 22  | 12  | 9  | 254   | 10  | 4  | 2.350 | 0.16  |
| KB061 | 613315.4 | 8573705.1 | 4.26 | 0.023 | 0.140  | 82  | 28  | 21  | 17 | 330   | 9   | 4  | 3.180 | 0.14  |
| KB062 | 608898.1 | 8576509.7 | 6.09 | 0.021 | 0.140  | 66  | 40  | 15  | 26 | 183   | 14  | 4  | 2.010 | 0.04  |
| KB063 | 609951.7 | 8580091.7 | 4.30 | 0.004 | 0.080  | 20  | 10  | 9   | 6  | 180   | 6   | 4  | 0.480 | 0.22  |
| KB064 | 613360.4 | 8579948.1 | 5.10 | 0.012 | 0.070  | 27  | 14  | 27  | 2  | 346   | 9   | 4  | 1.170 | 0.69  |
| KB065 | 615518.7 | 8575102.7 | 5.13 | 0.030 | 0.170  | 62  | 22  | 28  | 12 | 738   | 16  | 4  | 2.490 | 3.40  |
| KB066 | 615277.9 | 8576617.4 | 5.07 | 0.034 | 0.200  | 74  | 53  | 25  | 6  | 709   | 19  | 4  | 3.150 | 0.45  |
| KB067 | 609397.2 | 8582505.9 | 6.34 | 0.019 | 0.070  | 17  | 14  | 13  | 2  | 223   | 17  | 4  | 1.300 | 0.18  |
| KB069 | 609790.3 | 8584649.9 | 4.57 | 0.016 | 0.080  | 34  | 21  | 15  | 10 | 286   | 12  | 4  | 1.640 | 0.71  |
| KB070 | 612333.5 | 8582802.9 | 4.12 | 0.041 | 0.080  | 23  | 23  | 11  | 11 | 332   | 6   | 4  | 0.190 | 0.36  |
| KB071 | 616274.5 | 8579294.2 | 4.37 | 0.004 | 0.030  | 16  | 11  | 12  | 2  | 401   | 8   | 4  | 0.650 | 0.64  |
| KB072 | 616128.9 | 8578278.8 | 4.40 | 0.013 | 0.050  | 21  | 16  | 15  | 2  | 472   | 11  | 4  | 0.970 | 0.46  |
| KB073 | 616613.7 | 8582566.2 | 7.00 | 0.174 | 0.510  | 52  | 42  | 194 | 12 | 2806  | 138 | 24 | 2.540 | 2.06  |
| KB074 | 618082.3 | 8583152.0 | 7.46 | 0.030 | 0.840  | 11  | 11  | 232 | 10 | 926   | 21  | 4  | 0.380 | 0.26  |
| KB075 | 616937.1 | 8584136.9 | 4.39 | 0.013 | 0.050  | 42  | 23  | 21  | 10 | 591   | 13  | 4  | 1.610 | 0.46  |
| KB076 | 615660.1 | 8584003.9 | 5.89 | 0.015 | 0.090  | 47  | 35  | 37  | 14 | 877   | 20  | 4  | 2.250 | 2.75  |
| KB077 | 614736.7 | 8585077.8 | 4.50 | 0.013 | 0.090  | 27  | 21  | 26  | 13 | 494   | 14  | 4  | 1.120 | 0.94  |
| KB078 | 615092.1 | 8585681.5 | 5.10 | 0.012 | 0.080  | 16  | 14  | 18  | 5  | 443   | 10  | 4  | 0.770 | 0.51  |
| KB079 | 613535.7 | 8587437.5 | 4.62 | 0.034 | 0.180  | 105 | 46  | 47  | 11 | 1741  | 46  | 24 | 3.200 | 2.69  |
| KB081 | 611895.0 | 8588476.4 | 4.67 | 0.015 | 0.060  | 18  | 17  | 14  | 6  | 496   | 13  | 4  | 0.380 | 0.19  |
| KB083 | 611904.9 | 8589460.5 | 4.36 | 0.011 | 0.060  | 37  | 22  | 7   | 6  | 201   | 12  | 4  | 0.990 | 0.49  |
| KB084 | 616905.8 | 8585541.2 | 6.51 | 0.010 | 0.130  | 20  | 18  | 27  | 7  | 949   | 18  | 4  | 1.010 | 0.26  |
| KB086 | 622297.5 | 8571418.2 | 4.56 | 0.023 | 0.070  | 4   | 10  | 12  | 2  | 516   | 12  | 4  | 0.340 | 0.65  |
| KB087 | 622173.0 | 8573119.9 | 4.78 | 0.020 | 0.080  | 13  | 10  | 9   | 2  | 317   | 11  | 4  | 0.400 | 0.49  |
| KB088 | 625576.3 | 8573921.2 | 4.49 | 0.004 | 0.050  | 11  | 7   | 7   | 2  | 210   | 5   | 4  | 0.240 | 0.53  |
| KB090 | 620877.1 | 8576237.8 | 4.67 | 0.016 | 0.060  | 18  | 13  | 14  | 2  | 523   | 11  | 4  | 0.570 | 0.98  |
| KB091 | 622161.6 | 8577071.0 | 4.36 | 0.014 | 0.030  | 4   | 10  | 22  | 2  | 824   | 15  | 4  | 0.320 | 1.07  |
| KB092 | 623947.7 | 8576828.5 | 4.73 | 0.035 | 0.100  | 24  | 32  | 53  | 8  | 1944  | 35  | 17 | 1.070 | 2.02  |
| KB093 | 624381.4 | 8577221.6 | 4.92 | 0.020 | 0.100  | 10  | 12  | 36  | 2  | 1222  | 16  | 4  | 0.410 | 1.58  |
| KB094 | 625162.2 | 8575926.7 | 4.47 | 0.004 | 0.050  | 18  | 21  | 10  | 2  | 365   | 9   | 4  | 0.790 | 0.58  |
| KB095 | 625339.2 | 8576762.6 | 4.78 | 0.011 | 0.050  | 10  | 11  | 21  | 2  | 743   | 11  | 4  | 0.430 | 0.96  |
| KB096 | 621820.7 | 8578765.1 | 4.64 | 0.012 | 0.050  | 30  | 18  | 25  | 2  | 702   | 14  | 4  | 0.920 | 0.69  |
| KB097 | 625622.2 | 8579985.1 | 6.56 | 0.063 | 0.200  | 23  | 26  | 182 | 11 | 6922  | 77  | 32 | 1.180 | 6.94  |
| KB098 | 626824.9 | 8579290.0 | 6.47 | 0.065 | 0.330  | 16  | 22  | 182 | 9  | 5855  | 73  | 30 | 0.980 | 5.75  |
| KB099 | 627493.9 | 8580062.9 | 6.48 | 0.048 | 2.980  | 35  | 38  | 320 | 12 | 9926  | 64  | 32 | 1.910 | 10.47 |
| KB102 | 616859.8 | 8572225.5 | 4.24 | 0.022 | 0.090  | 65  | 31  | 70  | 7  | 2079  | 16  | 4  | 2.050 | 0.44  |
| KB103 | 617274.5 | 8572180.1 | 5.67 | 0.013 | 0.050  | 85  | 55  | 208 | 36 | 5618  | 25  | 4  | 2.980 | 0.83  |
| KB105 | 630911.6 | 8578112.3 | 7.50 | 0.230 | 5.030  | 39  | 43  | 606 | 23 | 11830 | 123 | 58 | 2.130 | 0.78  |
| KB106 | 630191.6 | 8578364.9 | 5.19 | 0.004 | 0.060  | 24  | 25  | 162 | 11 | 6949  | 56  | 30 | 1.280 | 9.27  |
| KB107 | 629357.6 | 8578831.7 | 7.85 | 0.078 | 10.370 | 36  | 39  | 375 | 16 | 2443  | 29  | 4  | 1.530 | 7.65  |
| KB108 | 628965.0 | 8576413.3 | 4.67 | 0.013 | 0.050  | 19  | 16  | 29  | 7  | 1010  | 13  | 4  | 0.560 | 1.12  |
| KB110 | 627638.4 | 8575130.3 | 6.02 | 0.004 | 0.060  | 19  | 13  | 15  | 2  | 481   | 10  | 4  | 0.670 | 0.54  |
| KV002 | 632223.0 | 8570158.0 | 4.49 | 0.013 | 0.040  | 14  | 16  | 12  | 2  | 445   | 12  | 4  | 0.670 | 0.70  |
| KV004 | 631228.0 | 8567407.0 | 5.62 | 0.011 | 0.050  | 10  | 11  | 5   | 2  | 191   | 6   | 4  | 0.400 | 0.44  |

|       |          |           |      |       |       |    |    |     |    |      |    |    |       |       |
|-------|----------|-----------|------|-------|-------|----|----|-----|----|------|----|----|-------|-------|
| KV009 | 616370.0 | 8589914.0 | 6.80 | 0.033 | 0.120 | 22 | 19 | 25  | 9  | 908  | 30 | 4  | 0.860 | 1.76  |
| KV010 | 617539.0 | 8589501.0 | 5.18 | 0.020 | 0.100 | 21 | 14 | 31  | 6  | 992  | 23 | 11 | 0.890 | 0.84  |
| KV011 | 617344.0 | 8587107.0 | 5.24 | 0.014 | 0.040 | 22 | 13 | 22  | 7  | 662  | 14 | 4  | 0.650 | 0.74  |
| KV013 | 619331.0 | 8590263.0 | 4.78 | 0.026 | 0.130 | 91 | 44 | 24  | 13 | 786  | 21 | 13 | 2.790 | 1.99  |
| KV014 | 621390.0 | 8588750.0 | 4.38 | 0.026 | 0.070 | 35 | 29 | 30  | 12 | 969  | 13 | 4  | 2.670 | 1.10  |
| KV016 | 622589.0 | 8589930.0 | 5.81 | 0.070 | 0.310 | 51 | 35 | 120 | 13 | 4809 | 94 | 43 | 2.910 | 4.68  |
| KV017 | 621180.0 | 8586550.0 | 5.24 | 0.049 | 0.180 | 24 | 24 | 102 | 11 | 3536 | 71 | 30 | 1.540 | 2.83  |
| KV018 | 622536.0 | 8586825.0 | 5.59 | 0.016 | 0.100 | 33 | 23 | 19  | 7  | 659  | 14 | 4  | 1.180 | 1.08  |
| KV020 | 624540.0 | 8587215.0 | 5.70 | 0.052 | 0.080 | 36 | 27 | 68  | 9  | 2686 | 40 | 15 | 1.880 | 4.09  |
| KV021 | 623531.0 | 8588075.0 | 4.60 | 0.017 | 0.030 | 59 | 34 | 26  | 11 | 529  | 10 | 4  | 2.350 | 0.52  |
| KV027 | 621689.0 | 8582841.0 | 5.04 | 0.020 | 0.060 | 33 | 24 | 67  | 17 | 2246 | 22 | 4  | 1.520 | 0.44  |
| KV028 | 622819.0 | 8585108.0 | 7.78 | 0.412 | 7.720 | 31 | 34 | 590 | 21 | 2027 | 52 | 15 | 3.180 | 23.52 |
| KV031 | 622290.0 | 8582015.0 | 4.85 | 0.033 | 0.160 | 37 | 27 | 129 | 16 | 6401 | 72 | 37 | 1.760 | 5.91  |
| KV032 | 623680.0 | 8583049.0 | 5.58 | 0.062 | 0.170 | 25 | 23 | 99  | 15 | 4055 | 96 | 30 | 1.560 | 3.53  |
| KV035 | 624683.0 | 8584009.0 | 6.35 | 0.060 | 1.040 | 58 | 34 | 191 | 17 | 3440 | 46 | 16 | 2.750 | 6.60  |
| KV036 | 626131.0 | 8584821.0 | 5.89 | 0.034 | 0.150 | 45 | 38 | 93  | 24 | 3645 | 44 | 20 | 1.840 | 4.22  |
| KV037 | 632095.0 | 8565689.0 | 4.37 | 0.004 | 0.020 | 15 | 10 | 10  | 2  | 202  | 8  | 4  | 0.380 | 0.17  |
| KV038 | 635145.0 | 8572965.0 | 4.54 | 0.004 | 0.040 | 4  | 9  | 11  | 5  | 310  | 8  | 4  | 0.170 | 0.23  |
| KV040 | 634799.0 | 8570640.0 | 4.91 | 0.052 | 0.220 | 13 | 13 | 15  | 5  | 333  | 20 | 4  | 0.550 | 0.42  |
| KV041 | 634958.0 | 8567914.0 | 4.24 | 0.015 | 0.040 | 16 | 10 | 8   | 2  | 289  | 11 | 4  | 0.450 | 0.30  |
| KV044 | 634173.0 | 8564079.0 | 3.94 | 0.017 | 0.080 | 4  | 4  | 7   | 2  | 309  | 7  | 4  | 0.130 | 0.40  |
| MA001 | 640737.0 | 8618176.4 | 4.48 | 0.004 | 0.038 | 18 | 13 | 2   | 2  | 204  | 10 | 12 | 1.000 | 2.04  |
| MA002 | 641889.0 | 8619440.4 | 4.50 | 0.004 | 0.027 | 4  | 7  | 2   | 2  | 68   | 6  | 4  | 0.440 | 1.10  |
| MA003 | 644053.9 | 8622236.8 | 4.67 | 0.012 | 0.062 | 35 | 20 | 5   | 2  | 64   | 10 | 19 | 1.340 | 8.71  |
| MA004 | 645586.2 | 8624550.7 | 4.43 | 0.004 | 0.052 | 20 | 13 | 2   | 2  | 33   | 5  | 4  | 1.120 | 1.13  |
| MA005 | 646340.8 | 8623258.2 | 4.10 | 0.004 | 0.040 | 10 | 10 | 2   | 2  | 35   | 5  | 4  | 0.740 | 0.98  |
| MA006 | 647005.4 | 8621800.5 | 4.33 | 0.004 | 0.053 | 22 | 12 | 2   | 2  | 35   | 6  | 4  | 0.890 | 1.07  |
| MA007 | 648256.3 | 8620881.8 | 4.54 | 0.004 | 0.052 | 29 | 14 | 2   | 2  | 44   | 7  | 4  | 0.920 | 1.67  |
| MA008 | 649680.2 | 8620235.2 | 4.43 | 0.004 | 0.082 | 16 | 14 | 2   | 2  | 50   | 10 | 4  | 0.770 | 1.31  |
| MB002 | 639658.1 | 8618080.9 | 6.62 | 0.034 | 0.130 | 20 | 9  | 6   | 2  | 491  | 17 | 4  | 0.550 | 0.83  |
| MB003 | 638895.9 | 8619399.3 | 4.62 | 0.014 | 0.097 | 21 | 9  | 2   | 2  | 223  | 9  | 4  | 0.620 | 1.01  |
| MB005 | 641316.3 | 8621756.7 | 4.54 | 0.014 | 0.058 | 59 | 25 | 2   | 2  | 78   | 16 | 4  | 1.850 | 1.67  |
| MB007 | 639956.0 | 8620892.4 | 4.97 | 0.004 | 0.057 | 24 | 10 | 2   | 2  | 140  | 9  | 4  | 0.900 | 2.70  |
| MB009 | 651018.0 | 8619510.8 | 4.72 | 0.012 | 0.093 | 23 | 11 | 2   | 2  | 115  | 15 | 11 | 0.900 | 2.70  |
| MB010 | 646680.8 | 8618920.3 | 4.49 | 0.004 | 0.088 | 29 | 17 | 2   | 2  | 56   | 13 | 4  | 0.780 | 1.14  |
| MB011 | 644387.4 | 8619356.1 | 4.88 | 0.004 | 0.059 | 18 | 5  | 2   | 2  | 34   | 6  | 4  | 0.320 | 0.74  |
| MB012 | 643218.1 | 8618604.4 | 4.20 | 0.019 | 0.034 | 13 | 4  | 2   | 2  | 54   | 7  | 4  | 0.100 | 0.30  |
| MB013 | 643996.2 | 8620137.7 | 4.77 | 0.004 | 0.036 | 18 | 7  | 2   | 2  | 39   | 8  | 4  | 0.330 | 0.60  |
| MB014 | 644511.4 | 8625213.4 | 4.18 | 0.004 | 0.029 | 25 | 9  | 2   | 2  | 54   | 6  | 4  | 0.580 | 0.67  |
| MB015 | 642698.2 | 8625035.4 | 5.26 | 0.004 | 0.036 | 27 | 9  | 2   | 2  | 55   | 9  | 4  | 0.520 | 1.10  |
| MB016 | 641203.7 | 8624210.5 | 4.54 | 0.004 | 0.053 | 24 | 11 | 2   | 2  | 40   | 5  | 4  | 0.610 | 1.41  |
| MB017 | 640718.2 | 8625405.3 | 4.42 | 0.018 | 0.082 | 55 | 26 | 2   | 2  | 49   | 16 | 12 | 1.790 | 5.17  |
| MB018 | 641416.3 | 8623196.5 | 4.37 | 0.010 | 0.065 | 56 | 21 | 2   | 7  | 69   | 10 | 4  | 1.100 | 2.04  |
| MB020 | 643513.9 | 8623416.6 | 4.55 | 0.004 | 0.042 | 30 | 9  | 2   | 2  | 39   | 6  | 4  | 0.380 | 1.65  |
| MB021 | 636476.6 | 8620545.3 | 4.49 | 0.018 | 0.080 | 31 | 10 | 5   | 2  | 295  | 10 | 4  | 1.080 | 2.07  |
| MB022 | 636522.6 | 8618742.6 | 4.51 | 0.004 | 0.073 | 34 | 14 | 2   | 2  | 343  | 12 | 4  | 1.210 | 2.72  |
| MV002 | 635794.7 | 8619531.6 | 4.26 | 0.016 | 0.054 | 4  | 10 | 4   | 2  | 368  | 7  | 4  | 0.750 | 1.63  |
| MV005 | 636884.2 | 8621359.4 | 5.34 | 0.059 | 0.251 | 45 | 31 | 7   | 2  | 623  | 28 | 14 | 2.370 | 2.76  |
| MV008 | 636223.6 | 8623514.5 | 4.54 | 0.016 | 0.210 | 22 | 18 | 5   | 2  | 129  | 13 | 19 | 1.140 | 1.60  |
| MV009 | 638902.1 | 8623726.6 | 5.60 | 0.017 | 0.164 | 42 | 19 | 2   | 2  | 116  | 14 | 14 | 1.590 | 3.06  |
| MV010 | 638265.2 | 8625480.9 | 4.20 | 0.027 | 0.158 | 52 | 25 | 2   | 2  | 172  | 18 | 14 | 2.710 | 5.93  |
| MV011 | 636396.7 | 8626376.1 | 4.66 | 0.014 | 0.171 | 4  | 8  | 2   | 2  | 142  | 10 | 4  | 0.240 | 0.33  |
| MV012 | 636351.0 | 8627264.4 | 5.81 | 0.014 | 0.174 | 23 | 17 | 2   | 2  | 192  | 16 | 4  | 0.890 | 0.99  |
| RB001 | 646155.2 | 8617566.1 | 4.70 | 0.004 | 0.017 | 11 | 11 | 2   | 2  | 75   | 6  | 4  | 0.230 | 0.22  |
| RB002 | 653195.6 | 8614019.9 | 4.06 | 0.004 | 0.026 | 15 | 12 | 2   | 2  | 55   | 5  | 4  | 0.530 | 0.83  |
| RB003 | 656643.3 | 8614362.3 | 4.56 | 0.017 | 0.082 | 30 | 20 | 2   | 2  | 82   | 12 | 4  | 0.920 | 1.31  |
| RB004 | 651055.9 | 8618038.7 | 4.86 | 0.012 | 0.094 | 18 | 17 | 5   | 2  | 71   | 14 | 4  | 0.630 | 2.03  |
| RB006 | 654385.0 | 8609629.5 | 4.28 | 0.016 | 0.121 | 64 | 40 | 5   | 9  | 64   | 16 | 11 | 2.140 | 3.77  |
| RB007 | 657300.8 | 8607951.5 | 4.12 | 0.027 | 0.196 | 31 | 34 | 14  | 13 | 127  | 15 | 16 | 0.670 | 0.79  |
| RB009 | 650972.0 | 8605906.2 | 4.56 | 0.015 | 0.072 | 22 | 16 | 5   | 2  | 139  | 9  | 4  | 0.880 | 0.48  |
| RB010 | 654654.0 | 8606249.7 | 5.34 | 0.012 | 0.141 | 27 | 23 | 2   | 2  | 129  | 20 | 4  | 0.740 | 0.04  |

|       |          |           |      |       |       |    |    |    |    |      |     |    |       |       |
|-------|----------|-----------|------|-------|-------|----|----|----|----|------|-----|----|-------|-------|
| RB011 | 658016.1 | 8606064.4 | 5.81 | 0.004 | 0.037 | 34 | 25 | 2  | 7  | 68   | 16  | 4  | 1.060 | 2.39  |
| RB013 | 660574.1 | 8603369.1 | 5.66 | 0.013 | 0.070 | 30 | 24 | 6  | 2  | 76   | 13  | 4  | 1.010 | 6.64  |
| RB014 | 659796.1 | 8599368.1 | 5.73 | 0.018 | 0.161 | 77 | 39 | 6  | 9  | 108  | 24  | 4  | 2.110 | 3.44  |
| RB015 | 658536.8 | 8597207.6 | 5.19 | 0.004 | 0.058 | 16 | 15 | 2  | 5  | 51   | 12  | 12 | 1.150 | 0.04  |
| RB016 | 654116.4 | 8601805.7 | 4.10 | 0.016 | 0.083 | 17 | 13 | 2  | 5  | 103  | 7   | 4  | 0.660 | 0.35  |
| RB018 | 645336.7 | 8609315.2 | 4.40 | 0.029 | 0.126 | 85 | 51 | 5  | 7  | 287  | 26  | 17 | 4.030 | 0.96  |
| RB019 | 648908.0 | 8610496.1 | 4.39 | 0.046 | 0.246 | 95 | 52 | 6  | 14 | 220  | 17  | 12 | 2.400 | 2.07  |
| RB021 | 639566.8 | 8617146.2 | 4.64 | 0.004 | 0.048 | 30 | 14 | 2  | 8  | 118  | 25  | 10 | 0.640 | 0.79  |
| RB022 | 641176.0 | 8617080.4 | 6.20 | 0.027 | 0.110 | 22 | 13 | 2  | 2  | 147  | 57  | 19 | 0.710 | 1.18  |
| RB024 | 647042.4 | 8614296.4 | 4.86 | 0.004 | 0.068 | 32 | 15 | 2  | 2  | 73   | 18  | 10 | 0.940 | 2.61  |
| RB026 | 643816.8 | 8614157.3 | 4.48 | 0.011 | 0.079 | 31 | 21 | 2  | 7  | 122  | 13  | 4  | 0.820 | 1.00  |
| RB027 | 638092.9 | 8613428.0 | 5.14 | 0.018 | 0.114 | 55 | 33 | 12 | 2  | 1240 | 28  | 13 | 2.210 | 1.98  |
| RB028 | 641170.6 | 8612623.9 | 3.96 | 0.004 | 0.049 | 29 | 15 | 2  | 2  | 380  | 8   | 4  | 0.900 | 0.04  |
| RB029 | 641482.4 | 8614646.2 | 6.45 | 0.011 | 0.068 | 42 | 21 | 6  | 6  | 445  | 13  | 4  | 0.640 | 4.91  |
| RB030 | 643918.2 | 8611572.9 | 4.19 | 0.004 | 0.043 | 14 | 17 | 2  | 2  | 131  | 10  | 4  | 1.270 | 0.18  |
| RB031 | 636338.2 | 8617734.8 | 4.55 | 0.035 | 0.167 | 85 | 72 | 12 | 7  | 1083 | 26  | 18 | 4.740 | 11.56 |
| RB032 | 636045.4 | 8613614.1 | 6.60 | 0.124 | 1.342 | 51 | 47 | 49 | 9  | 5366 | 130 | 35 | 2.690 | 6.04  |
| RM001 | 659470.9 | 8590300.6 | 5.78 | 0.015 | 0.046 | 20 | 19 | 2  | 5  | 37   | 12  | 4  | 0.910 | 0.44  |
| RM002 | 657603.0 | 8593066.6 | 4.25 | 0.004 | 0.063 | 27 | 27 | 2  | 2  | 54   | 7   | 4  | 1.700 | 0.44  |
| RM003 | 653392.3 | 8592255.6 | 4.12 | 0.004 | 0.048 | 14 | 14 | 2  | 5  | 39   | 9   | 4  | 0.520 | 0.04  |
| RM004 | 649925.6 | 8593467.6 | 4.07 | 0.004 | 0.040 | 10 | 10 | 2  | 6  | 51   | 7   | 4  | 0.440 | 0.04  |
| RM005 | 644449.3 | 8606061.6 | 4.38 | 0.004 | 0.042 | 15 | 9  | 2  | 2  | 122  | 8   | 4  | 0.420 | 0.18  |
| RM007 | 646864.8 | 8604435.0 | 4.66 | 0.010 | 0.036 | 25 | 15 | 2  | 2  | 80   | 6   | 4  | 0.610 | 0.04  |
| RM008 | 650088.3 | 8601524.6 | 4.24 | 0.004 | 0.030 | 23 | 17 | 2  | 2  | 41   | 7   | 4  | 0.460 | 0.04  |
| RM009 | 654718.1 | 8596759.7 | 4.54 | 0.004 | 0.044 | 18 | 8  | 2  | 2  | 17   | 4   | 4  | 0.330 | 0.04  |
| RM013 | 648954.1 | 8596391.8 | 5.48 | 0.004 | 0.013 | 10 | 7  | 2  | 2  | 26   | 5   | 4  | 0.370 | 0.14  |
| RM015 | 646523.4 | 8592902.0 | 4.54 | 0.004 | 0.039 | 16 | 13 | 2  | 2  | 50   | 8   | 4  | 0.460 | 0.04  |
| RM017 | 640881.8 | 8591894.2 | 4.98 | 0.004 | 0.059 | 13 | 13 | 7  | 2  | 115  | 11  | 4  | 0.680 | 0.48  |
| RM018 | 645932.2 | 8597633.0 | 4.31 | 0.004 | 0.051 | 15 | 12 | 2  | 2  | 87   | 7   | 4  | 0.540 | 0.18  |
| RM020 | 642487.5 | 8596404.8 | 4.78 | 0.004 | 0.049 | 17 | 9  | 2  | 2  | 78   | 6   | 4  | 0.330 | 0.04  |
| RM022 | 639872.4 | 8599652.2 | 6.01 | 0.004 | 0.080 | 21 | 10 | 2  | 2  | 90   | 6   | 4  | 0.350 | 0.04  |
| RM023 | 638411.8 | 8596942.6 | 4.23 | 0.004 | 0.083 | 4  | 12 | 2  | 2  | 152  | 7   | 4  | 0.410 | 0.18  |
| RM026 | 636679.7 | 8593218.4 | 4.99 | 0.004 | 0.058 | 13 | 10 | 5  | 2  | 91   | 6   | 4  | 0.350 | 0.04  |
| RM027 | 637005.1 | 8591060.1 | 4.35 | 0.004 | 0.081 | 27 | 17 | 2  | 2  | 68   | 10  | 4  | 0.620 | 0.04  |
| RM028 | 641159.0 | 8609615.5 | 3.87 | 0.015 | 0.060 | 34 | 18 | 2  | 2  | 253  | 6   | 4  | 0.940 | 0.39  |
| RM030 | 647224.4 | 8602057.3 | 5.02 | 0.012 | 0.048 | 43 | 19 | 6  | 6  | 118  | 14  | 4  | 0.880 | 0.14  |
| RM031 | 643367.2 | 8601052.5 | 4.26 | 0.004 | 0.065 | 4  | 12 | 6  | 2  | 202  | 8   | 4  | 0.690 | 0.26  |
| RM032 | 641774.1 | 8605372.7 | 4.40 | 0.004 | 0.041 | 4  | 7  | 2  | 2  | 71   | 4   | 4  | 0.220 | 0.18  |
| RM034 | 639892.9 | 8609369.7 | 4.67 | 0.004 | 0.051 | 4  | 6  | 2  | 2  | 200  | 7   | 4  | 0.210 | 0.22  |
| RM035 | 640155.1 | 8606649.8 | 4.10 | 0.011 | 0.082 | 4  | 15 | 2  | 2  | 175  | 6   | 4  | 0.590 | 0.31  |
| RM036 | 639720.0 | 8605248.7 | 4.20 | 0.004 | 0.056 | 12 | 11 | 2  | 2  | 103  | 6   | 4  | 0.410 | 0.31  |
| RM037 | 637393.1 | 8611356.6 | 4.74 | 0.012 | 0.074 | 17 | 16 | 7  | 2  | 721  | 25  | 4  | 0.770 | 0.70  |
| RM039 | 637405.0 | 8607020.1 | 4.73 | 0.014 | 0.057 | 13 | 9  | 9  | 2  | 710  | 7   | 4  | 0.310 | 0.57  |
| RM040 | 636747.3 | 8609363.6 | 4.14 | 0.004 | 0.041 | 4  | 9  | 2  | 2  | 359  | 7   | 4  | 0.270 | 0.39  |
| SA010 | 617003.2 | 8618972.2 | 5.55 | 0.023 | 0.097 | 41 | 44 | 27 | 13 | 461  | 19  | 10 | 1.710 | 0.34  |
| SA011 | 615017.7 | 8618203.9 | 4.90 | 0.023 | 0.125 | 13 | 10 | 8  | 2  | 529  | 12  | 4  | 0.530 | 0.16  |
| SA013 | 615218.8 | 8620170.3 | 5.53 | 0.026 | 0.142 | 4  | 7  | 7  | 2  | 537  | 10  | 4  | 0.320 | 0.04  |
| SA015 | 612672.9 | 8618923.9 | 5.39 | 0.015 | 0.124 | 14 | 10 | 6  | 2  | 285  | 11  | 11 | 0.500 | 0.16  |
| SA016 | 611520.1 | 8618219.8 | 4.94 | 0.015 | 0.066 | 25 | 37 | 11 | 8  | 254  | 14  | 4  | 0.960 | 0.28  |
| SA017 | 620556.2 | 8624720.5 | 4.33 | 0.025 | 0.061 | 14 | 7  | 7  | 2  | 803  | 9   | 10 | 0.480 | 0.54  |
| SA018 | 622262.6 | 8624209.2 | 5.17 | 0.017 | 0.069 | 16 | 46 | 8  | 2  | 595  | 10  | 4  | 1.060 | 0.39  |
| SA019 | 615119.0 | 8629576.0 | 4.07 | 0.025 | 0.108 | 4  | 7  | 5  | 2  | 370  | 9   | 11 | 0.420 | 0.34  |
| SA020 | 624868.2 | 8622039.7 | 4.48 | 0.028 | 0.141 | 25 | 32 | 11 | 5  | 1188 | 17  | 13 | 2.200 | 0.74  |
| SA021 | 625849.7 | 8620997.5 | 5.08 | 0.047 | 0.169 | 54 | 35 | 20 | 7  | 2057 | 22  | 20 | 2.430 | 1.04  |
| SA023 | 626744.5 | 8620418.9 | 6.00 | 0.040 | 0.103 | 18 | 13 | 11 | 2  | 1502 | 20  | 13 | 0.970 | 1.73  |
| SA024 | 627203.9 | 8619471.9 | 6.36 | 0.043 | 0.139 | 11 | 11 | 21 | 5  | 2554 | 24  | 12 | 0.690 | 0.83  |
| SB001 | 628523.2 | 8618126.8 | 6.40 | 0.062 | 0.149 | 18 | 9  | 20 | 2  | 2536 | 21  | 13 | 0.490 | 1.25  |
| SB023 | 624151.8 | 8618490.9 | 4.25 | 0.016 | 0.033 | 20 | 17 | 9  | 2  | 831  | 11  | 4  | 1.020 | 0.51  |
| SB024 | 623512.3 | 8618018.8 | 5.02 | 0.018 | 0.068 | 20 | 11 | 12 | 2  | 881  | 16  | 4  | 0.970 | 0.63  |
| SB026 | 620874.4 | 8619956.0 | 4.77 | 0.010 | 0.052 | 18 | 10 | 5  | 5  | 335  | 7   | 4  | 0.440 | 0.35  |
| SB027 | 621474.5 | 8619666.1 | 4.54 | 0.016 | 0.060 | 24 | 28 | 11 | 7  | 632  | 13  | 4  | 1.000 | 0.56  |

|       |          |           |      |       |       |     |    |    |    |      |    |    |       |      |
|-------|----------|-----------|------|-------|-------|-----|----|----|----|------|----|----|-------|------|
| SB028 | 622515.2 | 8619636.1 | 5.82 | 0.031 | 0.121 | 23  | 8  | 13 | 5  | 1177 | 22 | 15 | 0.700 | 0.70 |
| SB030 | 626204.6 | 8620692.6 | 6.64 | 0.039 | 0.174 | 78  | 33 | 13 | 8  | 1185 | 17 | 10 | 2.810 | 1.10 |
| SB031 | 615529.0 | 8630516.0 | 5.62 | 0.018 | 0.124 | 4   | 5  | 6  | 2  | 372  | 12 | 4  | 0.270 | 0.30 |
| SB032 | 622837.5 | 8623124.4 | 5.66 | 0.035 | 0.203 | 16  | 8  | 12 | 2  | 1080 | 22 | 12 | 0.890 | 0.86 |
| SB033 | 621849.8 | 8624765.4 | 4.12 | 0.033 | 0.074 | 4   | 6  | 9  | 2  | 801  | 10 | 4  | 0.560 | 0.65 |
| SB034 | 618195.9 | 8623408.6 | 4.90 | 0.039 | 0.139 | 30  | 13 | 14 | 2  | 1006 | 21 | 12 | 1.160 | 0.70 |
| SB035 | 616908.9 | 8622735.3 | 4.88 | 0.037 | 0.155 | 15  | 12 | 12 | 2  | 632  | 16 | 4  | 0.800 | 0.26 |
| SB037 | 616716.4 | 8624546.4 | 5.37 | 0.018 | 0.081 | 12  | 5  | 10 | 2  | 556  | 16 | 4  | 0.420 | 0.44 |
| SB039 | 619230.9 | 8628054.4 | 4.88 | 0.025 | 0.118 | 19  | 8  | 7  | 2  | 507  | 22 | 14 | 0.610 | 0.65 |
| SB040 | 619293.8 | 8630916.7 | 4.45 | 0.031 | 0.122 | 48  | 12 | 9  | 2  | 380  | 10 | 4  | 1.970 | 0.42 |
| SB041 | 617959.0 | 8634084.4 | 4.56 | 0.012 | 0.039 | 23  | 4  | 5  | 2  | 138  | 6  | 4  | 0.750 | 0.49 |
| SB042 | 621302.3 | 8623876.7 | 4.13 | 0.012 | 0.060 | 4   | 3  | 5  | 2  | 227  | 7  | 4  | 0.250 | 0.35 |
| SB043 | 622551.3 | 8622604.2 | 4.61 | 0.018 | 0.081 | 13  | 5  | 11 | 2  | 947  | 17 | 10 | 0.490 | 0.44 |
| SB044 | 614948.0 | 8622940.3 | 4.95 | 0.025 | 0.106 | 13  | 13 | 7  | 2  | 400  | 10 | 4  | 0.410 | 0.19 |
| SB046 | 611910.9 | 8622832.1 | 6.86 | 0.004 | 0.266 | 22  | 16 | 16 | 5  | 211  | 14 | 4  | 0.940 | 0.14 |
| SB047 | 612929.4 | 8625597.3 | 4.20 | 0.019 | 0.049 | 11  | 8  | 5  | 2  | 352  | 8  | 4  | 0.410 | 0.23 |
| SB048 | 611729.7 | 8626137.8 | 4.83 | 0.010 | 0.065 | 17  | 5  | 4  | 2  | 127  | 7  | 4  | 0.220 | 0.10 |
| SB049 | 609913.5 | 8627964.6 | 5.32 | 0.026 | 0.083 | 15  | 7  | 5  | 2  | 312  | 9  | 4  | 0.520 | 0.28 |
| SB050 | 611312.7 | 8630252.7 | 5.20 | 0.023 | 0.113 | 10  | 11 | 7  | 2  | 281  | 11 | 4  | 0.590 | 0.38 |
| SB052 | 612490.5 | 8630029.7 | 5.71 | 0.021 | 0.111 | 11  | 10 | 6  | 2  | 262  | 14 | 4  | 0.410 | 0.22 |
| SB053 | 624195.0 | 8624124.4 | 6.50 | 0.031 | 0.067 | 19  | 16 | 7  | 2  | 640  | 14 | 4  | 1.170 | 1.52 |
| SB054 | 613403.2 | 8629924.1 | 4.33 | 0.029 | 0.115 | 4   | 8  | 5  | 2  | 452  | 11 | 4  | 0.480 | 0.43 |
| SB055 | 626905.0 | 8623654.4 | 7.08 | 0.028 | 0.146 | 20  | 13 | 9  | 2  | 641  | 15 | 4  | 0.580 | 0.87 |
| SB056 | 627219.2 | 8624662.1 | 4.85 | 0.015 | 0.075 | 19  | 18 | 8  | 2  | 401  | 17 | 18 | 1.370 | 0.96 |
| SB057 | 629929.6 | 8619743.2 | 7.07 | 0.030 | 0.187 | 11  | 15 | 7  | 2  | 1033 | 12 | 11 | 1.580 | 0.04 |
| SB058 | 628065.2 | 8621691.5 | 4.94 | 0.023 | 0.025 | 13  | 14 | 8  | 2  | 974  | 16 | 16 | 1.290 | 0.04 |
| SB059 | 628745.8 | 8622302.2 | 6.50 | 0.053 | 0.112 | 40  | 23 | 8  | 8  | 745  | 18 | 14 | 1.100 | 0.74 |
| SB060 | 627038.5 | 8619759.6 | 6.18 | 0.026 | 0.049 | 4   | 5  | 9  | 2  | 947  | 11 | 10 | 0.460 | 0.24 |
| SV001 | 634965.0 | 8618184.3 | 5.54 | 0.023 | 0.052 | 26  | 24 | 10 | 5  | 856  | 18 | 16 | 1.750 | 3.27 |
| SV004 | 635365.0 | 8621215.4 | 3.89 | 0.037 | 0.097 | 17  | 14 | 5  | 2  | 624  | 13 | 14 | 1.150 | 2.70 |
| SV013 | 630098.3 | 8620489.2 | 7.13 | 0.027 | 0.089 | 22  | 16 | 8  | 2  | 868  | 13 | 4  | 1.510 | 0.65 |
| SV015 | 630552.4 | 8622130.4 | 4.55 | 0.022 | 0.062 | 18  | 9  | 11 | 2  | 1084 | 11 | 14 | 0.780 | 0.93 |
| SV016 | 630905.3 | 8623488.4 | 5.33 | 0.033 | 0.142 | 86  | 41 | 8  | 6  | 628  | 19 | 4  | 3.360 | 3.54 |
| SV017 | 631665.7 | 8625129.1 | 7.27 | 0.011 | 0.130 | 21  | 13 | 5  | 2  | 303  | 14 | 4  | 0.850 | 1.04 |
| SV018 | 632718.2 | 8623882.1 | 4.41 | 0.025 | 0.097 | 17  | 12 | 10 | 2  | 943  | 21 | 10 | 0.750 | 3.33 |
| SV019 | 633489.1 | 8620986.4 | 6.57 | 0.016 | 0.140 | 17  | 11 | 8  | 2  | 666  | 18 | 17 | 0.810 | 1.52 |
| SV020 | 633359.0 | 8621928.4 | 4.35 | 0.016 | 0.021 | 14  | 7  | 6  | 2  | 539  | 9  | 4  | 0.620 | 1.04 |
| SV021 | 633187.6 | 8623138.0 | 4.83 | 0.019 | 0.063 | 36  | 24 | 5  | 2  | 364  | 14 | 4  | 1.690 | 5.22 |
| SV022 | 633992.9 | 8625057.4 | 4.85 | 0.018 | 0.062 | 19  | 10 | 5  | 2  | 376  | 10 | 10 | 0.660 | 1.69 |
| SV023 | 632769.0 | 8627284.3 | 4.47 | 0.014 | 0.064 | 12  | 9  | 2  | 2  | 169  | 9  | 4  | 0.750 | 1.52 |
| SV024 | 631343.2 | 8618872.0 | 7.61 | 0.040 | 3.636 | 12  | 13 | 10 | 2  | 1505 | 17 | 4  | 0.820 | 0.60 |
| SV025 | 630864.7 | 8618187.9 | 6.74 | 0.066 | 0.170 | 66  | 36 | 22 | 2  | 3014 | 17 | 19 | 3.370 | 2.88 |
| SV026 | 624912.0 | 8625705.0 | 4.46 | 0.035 | 0.107 | 16  | 11 | 10 | 2  | 857  | 21 | 15 | 0.670 | 1.24 |
| SV027 | 620655.0 | 8620959.0 | 5.83 | 0.040 | 0.109 | 4   | 6  | 12 | 2  | 1337 | 16 | 12 | 0.370 | 0.63 |
| SV029 | 609126.0 | 8623010.0 | 4.81 | 0.018 | 0.083 | 13  | 5  | 7  | 2  | 274  | 8  | 10 | 0.140 | 0.16 |
| SV031 | 629633.9 | 8626199.9 | 4.47 | 0.024 | 0.129 | 29  | 14 | 5  | 2  | 389  | 14 | 4  | 1.260 | 1.49 |
| SV032 | 628006.5 | 8628221.7 | 4.78 | 0.004 | 0.131 | 23  | 13 | 2  | 6  | 129  | 8  | 4  | 0.390 | 0.60 |
| SV034 | 626386.0 | 8628332.4 | 5.19 | 0.023 | 0.134 | 25  | 9  | 8  | 2  | 537  | 21 | 4  | 0.400 | 1.46 |
| UB001 | 610803.0 | 8601626.0 | 4.19 | 0.036 | 0.090 | 71  | 26 | 42 | 2  | 465  | 9  | 4  | 3.160 | 1.17 |
| UB002 | 608916.0 | 8600680.0 | 4.22 | 0.037 | 0.180 | 80  | 23 | 25 | 1  | 515  | 19 | 14 | 3.785 | 0.43 |
| UB003 | 610754.0 | 8598462.0 | 5.05 | 0.008 | 0.100 | 23  | 9  | 9  | 2  | 184  | 11 | 4  | 0.780 | 0.04 |
| UB004 | 610957.0 | 8598531.0 | 4.72 | 0.018 | 0.100 | 22  | 9  | 36 | 6  | 778  | 21 | 4  | 0.920 | 1.25 |
| UB005 | 611235.0 | 8597038.0 | 4.69 | 0.041 | 0.160 | 70  | 29 | 44 | 5  | 1107 | 39 | 19 | 2.980 | 5.76 |
| UB006 | 610979.0 | 8595270.0 | 5.14 | 0.041 | 0.130 | 49  | 26 | 33 | 10 | 789  | 42 | 14 | 3.000 | 0.67 |
| UB008 | 608640.0 | 8594637.0 | 5.67 | 0.028 | 0.100 | 115 | 54 | 44 | 19 | 602  | 17 | 10 | 4.130 | 0.04 |
| UB009 | 608737.0 | 8592502.0 | 6.53 | 0.033 | 0.290 | 114 | 28 | 42 | 22 | 708  | 20 | 13 | 3.790 | 0.04 |
| UB010 | 608954.0 | 8605167.0 | 4.38 | 0.027 | 0.100 | 15  | 7  | 28 | 2  | 816  | 15 | 17 | 0.710 | 1.39 |
| UB011 | 611987.0 | 8603698.0 | 4.46 | 0.037 | 0.070 | 22  | 10 | 37 | 2  | 477  | 9  | 10 | 1.070 | 0.67 |
| UB014 | 611354.0 | 8605362.0 | 5.18 | 0.016 | 0.070 | 6   | 2  | 18 | 2  | 351  | 9  | 14 | 0.230 | 0.24 |
| UB016 | 612941.0 | 8605529.0 | 4.13 | 0.023 | 0.070 | 6   | 8  | 9  | 2  | 370  | 6  | 4  | 0.700 | 0.92 |
| UB017 | 614421.0 | 8606621.0 | 4.58 | 0.013 | 0.050 | 6   | 7  | 8  | 2  | 201  | 5  | 4  | 0.470 | 0.58 |

|       |          |           |      |       |       |     |    |     |    |       |     |     |       |       |
|-------|----------|-----------|------|-------|-------|-----|----|-----|----|-------|-----|-----|-------|-------|
| UB019 | 614711.0 | 8599906.0 | 6.60 | 0.038 | 0.190 | 125 | 32 | 81  | 16 | 1468  | 44  | 13  | 4.430 | 0.78  |
| UB020 | 612036.0 | 8602802.0 | 4.34 | 0.040 | 0.080 | 26  | 13 | 88  | 2  | 1123  | 11  | 12  | 1.370 | 2.48  |
| UB022 | 617141.0 | 8602386.0 | 6.73 | 0.009 | 0.030 | 15  | 13 | 5   | 2  | 95    | 11  | 4   | 0.730 | 0.25  |
| UB023 | 621980.0 | 8601054.0 | 4.06 | 0.018 | 0.060 | 6   | 16 | 14  | 7  | 567   | 14  | 10  | 1.000 | 0.58  |
| UB024 | 620355.0 | 8601970.0 | 4.03 | 0.012 | 0.030 | 17  | 11 | 6   | 5  | 244   | 7   | 4   | 0.700 | 0.25  |
| UB025 | 618466.0 | 8601974.0 | 4.79 | 0.012 | 0.060 | 23  | 14 | 9   | 5  | 203   | 9   | 4   | 1.010 | 0.45  |
| UB026 | 615991.0 | 8601638.0 | 4.78 | 0.011 | 0.030 | 6   | 18 | 10  | 2  | 188   | 8   | 4   | 0.830 | 0.45  |
| UB027 | 615661.0 | 8599427.0 | 7.08 | 0.024 | 1.020 | 35  | 25 | 102 | 21 | 1119  | 40  | 11  | 2.100 | 0.72  |
| UB028 | 617698.0 | 8598716.0 | 4.48 | 0.020 | 0.070 | 35  | 54 | 2   | 15 | 34    | 24  | 4   | 2.500 | 0.45  |
| UB029 | 619709.0 | 8598209.0 | 5.67 | 0.028 | 0.090 | 78  | 42 | 31  | 13 | 356   | 97  | 13  | 4.820 | 1.66  |
| UB030 | 619626.0 | 8597692.0 | 5.19 | 0.026 | 0.090 | 46  | 22 | 19  | 14 | 437   | 19  | 10  | 3.110 | 0.12  |
| UB031 | 609878.0 | 8605944.0 | 4.65 | 0.035 | 0.050 | 6   | 8  | 9   | 2  | 482   | 10  | 17  | 0.320 | 0.12  |
| UB033 | 608760.0 | 8606362.0 | 4.23 | 0.020 | 0.060 | 18  | 11 | 8   | 2  | 305   | 7   | 12  | 0.880 | 0.25  |
| UB034 | 610189.0 | 8606120.0 | 4.60 | 0.027 | 0.060 | 6   | 6  | 13  | 2  | 316   | 9   | 4   | 0.250 | 0.25  |
| UB037 | 612679.0 | 8606925.0 | 5.07 | 0.024 | 0.100 | 60  | 44 | 22  | 5  | 330   | 17  | 11  | 2.310 | 0.52  |
| UB039 | 614009.0 | 8607292.0 | 5.24 | 0.017 | 0.050 | 60  | 44 | 22  | 5  | 330   | 17  | 11  | 1.280 | 0.65  |
| UB040 | 614011.0 | 8608131.0 | 4.34 | 0.037 | 0.090 | 21  | 17 | 17  | 2  | 992   | 21  | 18  | 0.930 | 0.75  |
| UB041 | 613440.0 | 8608079.0 | 4.85 | 0.023 | 0.040 | 22  | 9  | 10  | 2  | 381   | 13  | 11  | 1.030 | 0.49  |
| UB042 | 611770.0 | 8609054.0 | 4.07 | 0.019 | 0.050 | 6   | 4  | 6   | 2  | 385   | 6   | 10  | 0.430 | 0.36  |
| UB043 | 609714.0 | 8609031.0 | 4.21 | 0.022 | 0.060 | 6   | 10 | 2   | 2  | 236   | 6   | 4   | 0.820 | 0.11  |
| UB045 | 615746.0 | 8604972.0 | 4.60 | 0.020 | 0.050 | 6   | 8  | 8   | 2  | 377   | 8   | 4   | 0.540 | 0.04  |
| UB046 | 616323.0 | 8606601.0 | 5.16 | 0.015 | 0.050 | 34  | 16 | 11  | 2  | 216   | 11  | 11  | 1.390 | 0.17  |
| UB048 | 617508.0 | 8604485.0 | 4.52 | 0.014 | 0.030 | 6   | 8  | 5   | 2  | 247   | 5   | 10  | 0.460 | 0.23  |
| UB049 | 619590.0 | 8604995.0 | 4.49 | 0.012 | 0.030 | 6   | 24 | 2   | 2  | 151   | 18  | 4   | 1.320 | 0.04  |
| UB050 | 619777.0 | 8603584.0 | 4.24 | 0.024 | 0.080 | 19  | 15 | 13  | 2  | 563   | 18  | 12  | 1.010 | 0.23  |
| UB051 | 620898.0 | 8606507.0 | 5.00 | 0.022 | 0.060 | 29  | 18 | 11  | 2  | 411   | 13  | 11  | 1.340 | 0.55  |
| UB052 | 623630.0 | 8607706.0 | 4.50 | 0.011 | 0.040 | 26  | 31 | 2   | 2  | 253   | 9   | 4   | 1.930 | 0.11  |
| UB054 | 623296.0 | 8605434.0 | 4.54 | 0.013 | 0.050 | 22  | 24 | 6   | 2  | 313   | 9   | 4   | 1.440 | 0.30  |
| UB055 | 623829.0 | 8603706.0 | 4.16 | 0.014 | 0.040 | 16  | 20 | 2   | 2  | 186   | 6   | 4   | 1.260 | 0.11  |
| UB057 | 632441.0 | 8609332.0 | 4.49 | 0.007 | 0.020 | 6   | 8  | 2   | 2  | 202   | 4   | 4   | 0.640 | 0.04  |
| UB060 | 629981.0 | 8611364.0 | 6.36 | 0.035 | 0.090 | 21  | 26 | 9   | 5  | 627   | 52  | 14  | 1.330 | 0.43  |
| UB062 | 630190.0 | 8611123.0 | 5.46 | 0.020 | 0.030 | 18  | 23 | 8   | 2  | 486   | 15  | 4   | 1.400 | 1.00  |
| UB063 | 635180.0 | 8613887.0 | 5.00 | 0.162 | 0.110 | 28  | 42 | 77  | 14 | 15010 | 88  | 119 | 2.990 | 5.63  |
| UB064 | 634507.0 | 8613771.0 | 6.47 | 1.423 | 0.710 | 66  | 74 | 279 | 34 | 41900 | 225 | 192 | 6.190 | 13.75 |
| UB065 | 631875.0 | 8614929.0 | 5.34 | 0.183 | 0.090 | 41  | 27 | 71  | 9  | 13110 | 41  | 43  | 3.210 | 3.85  |
| UB067 | 631095.0 | 8615900.0 | 6.70 | 0.142 | 0.280 | 24  | 19 | 76  | 9  | 12030 | 84  | 55  | 2.310 | 2.21  |
| UB068 | 630728.0 | 8617049.0 | 5.05 | 0.092 | 0.140 | 15  | 19 | 56  | 10 | 7427  | 31  | 30  | 1.540 | 2.63  |
| UB069 | 629619.0 | 8617782.0 | 5.73 | 0.088 | 0.200 | 6   | 13 | 38  | 6  | 4819  | 24  | 19  | 0.820 | 1.63  |
| UB070 | 626885.0 | 8617888.0 | 4.67 | 0.110 | 0.200 | 23  | 27 | 46  | 13 | 6133  | 50  | 40  | 3.370 | 2.84  |
| UB071 | 624358.0 | 8616412.0 | 4.75 | 0.034 | 0.090 | 15  | 19 | 16  | 2  | 1748  | 13  | 10  | 1.050 | 0.30  |
| UB072 | 622739.0 | 8614957.0 | 4.30 | 0.027 | 0.090 | 6   | 22 | 20  | 5  | 1793  | 14  | 13  | 1.430 | 0.30  |
| UB073 | 620287.0 | 8615537.0 | 4.58 | 0.024 | 0.090 | 18  | 18 | 9   | 2  | 1054  | 19  | 4   | 1.200 | 0.57  |
| UB074 | 623166.0 | 8617505.0 | 4.38 | 0.014 | 0.040 | 17  | 17 | 2   | 2  | 467   | 9   | 4   | 1.100 | 0.04  |
| UB075 | 629494.0 | 8616769.0 | 4.66 | 0.037 | 0.070 | 24  | 24 | 16  | 2  | 2935  | 14  | 12  | 1.470 | 0.91  |
| UB076 | 628701.0 | 8615757.0 | 5.66 | 0.028 | 0.070 | 6   | 10 | 25  | 8  | 3030  | 20  | 16  | 0.640 | 0.70  |
| UB077 | 627850.0 | 8612991.0 | 5.38 | 0.019 | 0.060 | 6   | 9  | 15  | 5  | 1655  | 11  | 4   | 0.510 | 0.32  |
| UB078 | 626119.0 | 8612208.0 | 4.73 | 0.032 | 0.060 | 6   | 9  | 9   | 2  | 835   | 15  | 4   | 0.600 | 0.25  |
| UB080 | 625000.0 | 8611492.0 | 5.47 | 0.021 | 0.040 | 16  | 7  | 7   | 2  | 506   | 8   | 4   | 0.610 | 0.19  |
| UB081 | 627151.0 | 8611080.0 | 4.94 | 0.024 | 0.070 | 6   | 9  | 14  | 2  | 1325  | 9   | 13  | 0.570 | 0.25  |
| UB082 | 626794.0 | 8609877.0 | 5.27 | 0.050 | 0.160 | 18  | 23 | 22  | 10 | 2285  | 49  | 24  | 1.310 | 0.73  |
| UB085 | 633353.0 | 8615828.0 | 6.36 | 0.116 | 0.470 | 32  | 25 | 67  | 14 | 17860 | 45  | 48  | 1.940 | 6.35  |
| UB087 | 634733.0 | 8617890.0 | 4.45 | 0.011 | 0.030 | 23  | 14 | 2   | 2  | 400   | 6   | 4   | 1.090 | 0.73  |
| UB088 | 632359.0 | 8616788.0 | 4.85 | 0.059 | 0.090 | 51  | 24 | 29  | 2  | 4530  | 21  | 21  | 2.670 | 3.18  |
| UB090 | 632913.0 | 8612912.0 | 4.47 | 0.156 | 0.110 | 41  | 36 | 62  | 13 | 9627  | 38  | 64  | 2.740 | 5.04  |
| UB091 | 630301.0 | 8615114.0 | 5.31 | 0.201 | 0.190 | 38  | 23 | 60  | 8  | 9209  | 40  | 33  | 2.400 | 0.19  |
| UB092 | 629527.0 | 8613968.0 | 5.44 | 0.052 | 0.120 | 38  | 23 | 60  | 8  | 9209  | 40  | 33  | 1.060 | 1.62  |
| UB093 | 628930.0 | 8611599.0 | 8.29 | 0.026 | 4.310 | 6   | 17 | 12  | 8  | 1150  | 14  | 11  | 0.730 | 0.46  |
| UB096 | 628106.0 | 8611888.0 | 6.32 | 0.031 | 0.120 | 18  | 13 | 13  | 2  | 1428  | 15  | 14  | 0.660 | 0.19  |
| UJ001 | 612035.0 | 8598924.0 | 6.01 | 0.026 | 0.110 | 69  | 30 | 82  | 14 | 1016  | 30  | 12  | 2.740 | 0.91  |
| UJ003 | 614112.0 | 8597644.0 | 4.67 | 0.015 | 0.090 | 26  | 11 | 15  | 2  | 315   | 7   | 4   | 0.870 | 0.20  |
| UJ004 | 614153.0 | 8596022.0 | 4.78 | 0.023 | 0.120 | 48  | 23 | 19  | 7  | 422   | 14  | 10  | 1.220 | 0.13  |

|       |          |           |      |       |       |     |    |     |    |      |    |    |       |      |
|-------|----------|-----------|------|-------|-------|-----|----|-----|----|------|----|----|-------|------|
| UJ006 | 617048.0 | 8595740.0 | 4.21 | 0.030 | 0.090 | 75  | 29 | 18  | 5  | 376  | 20 | 4  | 4.270 | 0.78 |
| UJ008 | 620293.0 | 8595584.0 | 4.76 | 0.032 | 0.140 | 62  | 59 | 16  | 6  | 335  | 24 | 13 | 5.290 | 0.72 |
| UJ009 | 622932.0 | 8592350.0 | 4.80 | 0.026 | 0.170 | 62  | 32 | 46  | 6  | 1139 | 24 | 13 | 2.600 | 0.26 |
| UJ010 | 619480.0 | 8593274.0 | 4.87 | 0.021 | 0.130 | 109 | 33 | 12  | 9  | 175  | 14 | 4  | 4.810 | 0.13 |
| UJ011 | 618189.0 | 8592988.0 | 6.43 | 0.069 | 0.400 | 84  | 28 | 18  | 11 | 409  | 32 | 4  | 3.920 | 0.72 |
| UJ013 | 617260.0 | 8592752.0 | 4.06 | 0.029 | 0.170 | 84  | 24 | 14  | 6  | 547  | 9  | 4  | 3.770 | 0.04 |
| UJ015 | 614304.0 | 8591960.0 | 4.86 | 0.015 | 0.130 | 39  | 14 | 14  | 7  | 415  | 14 | 10 | 1.350 | 0.91 |
| UJ018 | 622408.0 | 8596128.0 | 6.33 | 0.043 | 0.240 | 173 | 82 | 38  | 29 | 408  | 61 | 10 | 4.560 | 0.33 |
| UJ020 | 625018.0 | 8595222.0 | 6.37 | 0.062 | 0.210 | 44  | 20 | 22  | 8  | 270  | 44 | 10 | 1.740 | 0.33 |
| UJ021 | 625858.0 | 8591284.0 | 4.76 | 0.017 | 0.180 | 37  | 14 | 25  | 5  | 578  | 18 | 15 | 1.350 | 0.52 |
| UJ022 | 629332.0 | 8593700.0 | 4.86 | 0.017 | 0.150 | 32  | 14 | 15  | 2  | 317  | 16 | 4  | 1.470 | 0.20 |
| UJ024 | 631952.0 | 8592204.0 | 4.83 | 0.017 | 0.100 | 26  | 11 | 12  | 2  | 227  | 13 | 4  | 1.070 | 0.26 |
| UJ025 | 632983.0 | 8591508.0 | 6.83 | 0.016 | 0.230 | 37  | 38 | 5   | 5  | 134  | 20 | 4  | 2.460 | 0.26 |
| UJ026 | 633869.0 | 8592342.0 | 4.30 | 0.014 | 0.040 | 32  | 20 | 7   | 6  | 141  | 10 | 4  | 1.270 | 0.04 |
| UJ029 | 633995.0 | 8595050.0 | 4.45 | 0.011 | 0.090 | 41  | 39 | 5   | 5  | 103  | 10 | 4  | 2.410 | 0.20 |
| UJ030 | 631539.0 | 8595330.0 | 5.06 | 0.018 | 0.110 | 24  | 10 | 17  | 2  | 339  | 19 | 4  | 1.050 | 0.39 |
| UJ032 | 632222.0 | 8597572.0 | 4.88 | 0.030 | 0.190 | 22  | 14 | 28  | 7  | 919  | 9  | 4  | 1.090 | 0.85 |
| UJ033 | 628360.0 | 8596534.0 | 4.60 | 0.017 | 0.110 | 22  | 8  | 11  | 2  | 255  | 9  | 4  | 0.900 | 0.04 |
| UJ035 | 628389.0 | 8598254.0 | 5.29 | 0.020 | 0.160 | 32  | 10 | 13  | 2  | 297  | 15 | 4  | 1.170 | 0.13 |
| UJ036 | 624864.0 | 8599060.0 | 4.70 | 0.015 | 0.090 | 88  | 65 | 23  | 11 | 204  | 19 | 4  | 3.320 | 0.04 |
| UJ037 | 622851.0 | 8598710.0 | 4.45 | 0.021 | 0.130 | 32  | 16 | 11  | 2  | 384  | 13 | 4  | 1.270 | 0.52 |
| UJ038 | 623715.0 | 8597436.0 | 4.54 | 0.021 | 0.150 | 44  | 20 | 11  | 2  | 351  | 13 | 4  | 2.010 | 0.48 |
| UJ039 | 625524.0 | 8600720.0 | 4.88 | 0.030 | 0.140 | 49  | 40 | 24  | 6  | 1099 | 22 | 22 | 2.420 | 0.35 |
| UJ040 | 623472.0 | 8602454.0 | 3.94 | 0.020 | 0.180 | 19  | 11 | 8   | 6  | 369  | 11 | 4  | 0.730 | 0.15 |
| UJ042 | 625249.0 | 8604182.0 | 4.12 | 0.046 | 0.200 | 17  | 54 | 40  | 10 | 209  | 13 | 4  | 3.040 | 1.02 |
| UJ043 | 624983.0 | 8606148.0 | 5.02 | 0.013 | 0.050 | 19  | 11 | 5   | 6  | 188  | 13 | 4  | 0.870 | 0.21 |
| UJ046 | 627676.0 | 8601515.0 | 5.86 | 0.007 | 0.050 | 19  | 15 | 5   | 6  | 86   | 13 | 4  | 0.840 | 0.04 |
| UJ047 | 627954.0 | 8604484.0 | 4.18 | 0.010 | 0.040 | 15  | 14 | 2   | 2  | 237  | 5  | 4  | 0.930 | 0.21 |
| UJ049 | 631811.0 | 8601114.0 | 5.07 | 0.014 | 0.040 | 17  | 8  | 5   | 2  | 146  | 10 | 11 | 0.600 | 0.28 |
| UJ051 | 632320.0 | 8605212.0 | 4.56 | 0.009 | 0.030 | 6   | 10 | 2   | 5  | 185  | 8  | 4  | 0.500 | 0.04 |
| UJ053 | 632085.0 | 8606874.0 | 4.42 | 0.008 | 0.040 | 6   | 10 | 2   | 7  | 172  | 7  | 4  | 0.940 | 0.04 |
| UJ055 | 626717.0 | 8606734.0 | 4.37 | 0.012 | 0.050 | 6   | 6  | 5   | 2  | 242  | 8  | 4  | 0.650 | 0.04 |
| UJ056 | 629723.0 | 8606422.0 | 4.10 | 0.020 | 0.080 | 19  | 20 | 5   | 2  | 448  | 8  | 4  | 1.450 | 0.81 |
| UJ057 | 630343.0 | 8608380.0 | 4.68 | 0.011 | 0.040 | 6   | 17 | 8   | 8  | 533  | 16 | 4  | 1.450 | 0.04 |
| UJ058 | 629714.0 | 8608500.0 | 4.46 | 0.014 | 0.040 | 6   | 14 | 5   | 7  | 434  | 9  | 4  | 0.960 | 0.21 |
| UJ061 | 634150.0 | 8609476.0 | 4.41 | 0.015 | 0.050 | 6   | 7  | 2   | 2  | 369  | 19 | 4  | 0.560 | 0.28 |
| UJ062 | 635481.0 | 8608144.0 | 4.35 | 0.034 | 0.130 | 6   | 8  | 18  | 2  | 1969 | 19 | 21 | 0.700 | 1.42 |
| UJ063 | 634980.0 | 8606436.0 | 4.81 | 0.007 | 0.020 | 6   | 6  | 2   | 2  | 153  | 4  | 4  | 0.330 | 0.25 |
| UJ064 | 635150.0 | 8604666.0 | 4.54 | 0.009 | 0.070 | 17  | 10 | 7   | 2  | 183  | 11 | 4  | 0.750 | 0.18 |
| UJ065 | 633628.0 | 8600958.0 | 5.06 | 0.007 | 0.060 | 6   | 4  | 2   | 2  | 110  | 6  | 4  | 0.430 | 0.04 |
| UJ066 | 634792.0 | 8599536.0 | 4.79 | 0.017 | 0.090 | 21  | 10 | 7   | 2  | 171  | 11 | 4  | 0.860 | 0.04 |
| UJ068 | 614736.0 | 8611024.0 | 4.89 | 0.005 | 0.030 | 6   | 5  | 2   | 2  | 109  | 3  | 4  | 0.310 | 0.04 |
| UJ071 | 616477.0 | 8613512.0 | 4.75 | 0.033 | 0.120 | 30  | 14 | 18  | 6  | 674  | 21 | 4  | 1.060 | 0.59 |
| UJ072 | 614565.0 | 8614776.0 | 4.09 | 0.014 | 0.050 | 6   | 5  | 2   | 2  | 418  | 6  | 4  | 0.330 | 0.25 |
| UJ076 | 616032.0 | 8617832.0 | 4.60 | 0.029 | 0.120 | 24  | 11 | 10  | 2  | 462  | 12 | 4  | 1.170 | 0.32 |
| UJ077 | 613444.0 | 8616838.0 | 4.18 | 0.028 | 0.110 | 24  | 9  | 8   | 2  | 728  | 11 | 13 | 1.320 | 1.01 |
| UJ079 | 610767.0 | 8616924.0 | 5.21 | 0.013 | 0.050 | 6   | 8  | 6   | 2  | 209  | 8  | 4  | 0.580 | 0.11 |
| UJ080 | 615819.0 | 8615630.0 | 4.75 | 0.024 | 0.120 | 42  | 18 | 9   | 2  | 245  | 10 | 13 | 2.010 | 0.45 |
| UJ082 | 611744.0 | 8612632.0 | 4.31 | 0.028 | 0.140 | 6   | 8  | 8   | 2  | 457  | 15 | 10 | 0.720 | 0.73 |
| UJ083 | 617398.0 | 8611110.0 | 5.27 | 0.035 | 0.110 | 16  | 15 | 12  | 2  | 770  | 19 | 15 | 0.770 | 0.04 |
| UJ084 | 618727.0 | 8613458.0 | 5.91 | 0.039 | 0.180 | 25  | 15 | 19  | 8  | 1354 | 41 | 25 | 1.440 | 0.94 |
| UJ085 | 620101.0 | 8611754.0 | 4.94 | 0.035 | 0.130 | 25  | 21 | 18  | 8  | 1571 | 41 | 25 | 1.620 | 0.87 |
| UJ089 | 622007.0 | 8610628.0 | 5.16 | 0.019 | 0.080 | 17  | 8  | 9   | 2  | 560  | 11 | 4  | 0.590 | 0.24 |
| LK001 | 644290.3 | 8557539.1 | 5.38 | 0.035 | 0.004 | 39  | 24 | 84  | 7  | 881  | 16 | 15 | 1.440 | 0.69 |
| LK002 | 643166.3 | 8558276.6 | 4.93 | 0.017 | 0.004 | 25  | 17 | 7   | 2  | 152  | 15 | 4  | 1.120 | 0.34 |
| LK003 | 646533.8 | 8556262.2 | 5.31 | 0.028 | 0.004 | 99  | 51 | 56  | 12 | 636  | 30 | 17 | 3.790 | 1.64 |
| LK004 | 645431.4 | 8554994.8 | 4.97 | 0.019 | 0.004 | 14  | 11 | 19  | 2  | 254  | 9  | 11 | 0.720 | 0.48 |
| LK005 | 645573.4 | 8553218.7 | 7.78 | 0.056 | 0.477 | 62  | 59 | 132 | 20 | 523  | 25 | 11 | 1.830 | 0.96 |
| LK009 | 649044.4 | 8554749.7 | 5.12 | 0.004 | 0.004 | 4   | 5  | 5   | 2  | 153  | 10 | 23 | 0.270 | 0.10 |
| LK010 | 647290.5 | 8551797.4 | 5.34 | 0.021 | 0.004 | 23  | 21 | 17  | 10 | 517  | 18 | 13 | 0.670 | 0.18 |
| LK011 | 643881.5 | 8553963.8 | 5.49 | 0.020 | 0.004 | 23  | 20 | 31  | 5  | 398  | 19 | 14 | 1.040 | 0.88 |

|       |          |           |      |       |       |     |     |     |    |       |     |     |       |       |
|-------|----------|-----------|------|-------|-------|-----|-----|-----|----|-------|-----|-----|-------|-------|
| LK012 | 650136.8 | 8556143.9 | 5.37 | 0.015 | 0.010 | 14  | 20  | 7   | 13 | 142   | 24  | 13  | 0.440 | 0.04  |
| LK014 | 650953.0 | 8559486.9 | 5.10 | 0.016 | 0.004 | 19  | 25  | 5   | 5  | 113   | 19  | 16  | 1.580 | 0.04  |
| LK015 | 650741.1 | 8552854.9 | 4.93 | 0.012 | 0.004 | 20  | 49  | 7   | 16 | 179   | 16  | 20  | 0.580 | 0.04  |
| LK016 | 649655.2 | 8549273.0 | 5.81 | 0.071 | 0.004 | 42  | 45  | 69  | 64 | 7541  | 138 | 116 | 4.050 | 13.75 |
| LK017 | 648020.0 | 8550342.0 | 7.93 | 0.123 | 3.220 | 67  | 51  | 204 | 19 | 1423  | 29  | 4   | 2.020 | 3.40  |
| LK018 | 643807.0 | 8552211.0 | 5.01 | 0.016 | 0.004 | 53  | 40  | 37  | 11 | 1148  | 56  | 11  | 2.260 | 2.50  |
| LK019 | 650724.0 | 8549583.0 | 5.60 | 0.030 | 0.004 | 32  | 37  | 19  | 12 | 2572  | 32  | 4   | 1.150 | 0.24  |
| LK021 | 644735.6 | 8550740.6 | 4.40 | 0.039 | 0.004 | 25  | 26  | 10  | 6  | 715   | 23  | 16  | 0.920 | 0.54  |
| LK022 | 642129.1 | 8550140.6 | 4.86 | 0.016 | 0.004 | 20  | 29  | 7   | 11 | 263   | 13  | 14  | 0.560 | 0.04  |
| LK024 | 643328.6 | 8551303.0 | 5.92 | 0.108 | 0.010 | 81  | 62  | 36  | 13 | 850   | 59  | 12  | 2.710 | 0.53  |
| LK025 | 644612.4 | 8551451.6 | 5.59 | 0.057 | 0.004 | 51  | 64  | 38  | 13 | 1910  | 75  | 84  | 2.080 | 2.26  |
| LK026 | 645988.4 | 8549928.9 | 4.83 | 0.027 | 0.004 | 27  | 25  | 15  | 9  | 927   | 22  | 16  | 0.760 | 0.33  |
| LK027 | 647017.2 | 8548806.0 | 4.77 | 0.021 | 0.004 | 36  | 45  | 12  | 6  | 1554  | 27  | 20  | 1.240 | 0.68  |
| LK028 | 647556.5 | 8548310.9 | 6.07 | 0.028 | 0.021 | 63  | 79  | 14  | 12 | 618   | 147 | 28  | 2.290 | 0.39  |
| LK029 | 647591.2 | 8548218.8 | 6.32 | 0.020 | 0.012 | 19  | 36  | 11  | 17 | 620   | 199 | 24  | 0.970 | 0.11  |
| LK030 | 649733.4 | 8548380.8 | 5.66 | 0.266 | 0.004 | 78  | 89  | 135 | 22 | 16630 | 73  | 39  | 3.840 | 10.77 |
| LK031 | 650171.2 | 8547768.8 | 5.11 | 0.073 | 0.004 | 39  | 70  | 35  | 17 | 4819  | 40  | 17  | 2.000 | 0.86  |
| LK032 | 650117.0 | 8547608.9 | 7.52 | 0.089 | 2.066 | 24  | 51  | 46  | 16 | 5271  | 267 | 94  | 1.620 | 1.36  |
| LK034 | 652383.4 | 8551972.4 | 4.95 | 0.004 | 0.004 | 39  | 47  | 12  | 19 | 185   | 22  | 4   | 1.410 | 0.04  |
| LK035 | 652222.7 | 8549724.3 | 6.28 | 0.075 | 0.024 | 75  | 87  | 25  | 15 | 754   | 77  | 24  | 2.690 | 0.35  |
| LK036 | 652126.6 | 8547689.2 | 5.80 | 0.026 | 0.004 | 41  | 50  | 22  | 14 | 1914  | 64  | 15  | 1.590 | 0.94  |
| LK037 | 647611.3 | 8549458.9 | 4.97 | 0.015 | 0.004 | 25  | 22  | 13  | 5  | 1653  | 9   | 15  | 0.620 | 0.22  |
| LM003 | 655081.5 | 8561514.6 | 5.00 | 0.004 | 0.004 | 21  | 23  | 2   | 6  | 55    | 19  | 4   | 1.170 | 0.04  |
| LM004 | 659255.2 | 8561474.3 | 4.64 | 0.011 | 0.004 | 16  | 21  | 2   | 2  | 44    | 8   | 4   | 1.000 | 0.04  |
| LM005 | 657489.0 | 8555620.6 | 5.89 | 0.021 | 0.004 | 39  | 37  | 7   | 13 | 83    | 43  | 4   | 1.450 | 0.04  |
| LM006 | 657115.4 | 8554262.1 | 5.36 | 0.016 | 0.004 | 35  | 52  | 9   | 9  | 91    | 62  | 19  | 1.470 | 0.04  |
| LM008 | 656391.8 | 8552029.6 | 5.14 | 0.012 | 0.004 | 32  | 43  | 8   | 18 | 80    | 18  | 4   | 0.990 | 0.04  |
| LM010 | 654757.4 | 8552176.7 | 4.56 | 0.014 | 0.004 | 35  | 40  | 7   | 13 | 184   | 14  | 4   | 1.390 | 0.04  |
| LM012 | 655154.6 | 8550631.4 | 5.19 | 0.015 | 0.004 | 46  | 117 | 7   | 11 | 105   | 38  | 17  | 1.930 | 0.04  |
| LM013 | 654152.9 | 8549408.2 | 5.36 | 0.036 | 0.004 | 48  | 63  | 15  | 12 | 291   | 34  | 19  | 1.670 | 0.04  |
| LM014 | 655945.5 | 8548338.5 | 4.82 | 0.013 | 0.004 | 18  | 30  | 8   | 19 | 103   | 20  | 14  | 0.530 | 0.04  |
| LM015 | 658228.1 | 8547117.2 | 5.09 | 0.010 | 0.004 | 41  | 64  | 10  | 8  | 86    | 31  | 14  | 1.390 | 0.04  |
| LM016 | 661785.5 | 8545462.6 | 5.33 | 0.016 | 0.004 | 109 | 174 | 13  | 18 | 71    | 38  | 26  | 4.390 | 0.24  |
| LM019 | 661923.5 | 8550038.0 | 5.10 | 0.004 | 0.004 | 47  | 28  | 11  | 19 | 64    | 20  | 4   | 1.330 | 0.04  |
| LM020 | 662290.9 | 8560024.6 | 5.45 | 0.011 | 0.010 | 32  | 35  | 6   | 11 | 50    | 17  | 10  | 1.170 | 0.04  |
| LM021 | 646541.2 | 8550294.4 | 5.24 | 0.020 | 0.004 | 19  | 24  | 23  | 5  | 2134  | 22  | 25  | 0.890 | 1.23  |
| LM022 | 650667.1 | 8546149.5 | 5.17 | 0.041 | 0.004 | 131 | 227 | 48  | 17 | 1004  | 79  | 30  | 5.140 | 0.91  |
| LM024 | 649712.1 | 8544253.5 | 5.02 | 0.004 | 0.004 | 28  | 27  | 9   | 7  | 295   | 18  | 4   | 0.860 | 0.04  |
| LM027 | 649232.6 | 8540283.3 | 5.45 | 0.014 | 0.004 | 21  | 18  | 2   | 2  | 54    | 12  | 4   | 0.700 | 0.04  |
| LM029 | 647948.0 | 8537946.9 | 5.27 | 0.004 | 0.004 | 24  | 22  | 5   | 6  | 46    | 12  | 4   | 0.710 | 0.04  |
| LM030 | 647878.4 | 8542151.4 | 5.86 | 0.023 | 0.004 | 39  | 34  | 22  | 5  | 129   | 15  | 4   | 1.440 | 0.22  |
| LM031 | 648888.3 | 8542054.2 | 8.83 | 0.034 | 3.553 | 59  | 59  | 74  | 30 | 1278  | 37  | 4   | 1.760 | 0.62  |
| LM032 | 648507.1 | 8544204.2 | 5.21 | 0.013 | 0.004 | 37  | 53  | 20  | 16 | 507   | 27  | 4   | 1.330 | 0.24  |
| LM033 | 646244.0 | 8544273.9 | 4.76 | 0.004 | 0.004 | 31  | 28  | 8   | 7  | 179   | 15  | 4   | 1.180 | 0.04  |
| LM034 | 645399.1 | 8543012.3 | 4.55 | 0.004 | 0.004 | 13  | 12  | 2   | 2  | 167   | 9   | 4   | 0.370 | 0.04  |
| LM035 | 644411.4 | 8545289.8 | 4.96 | 0.014 | 0.004 | 21  | 12  | 2   | 2  | 191   | 11  | 4   | 0.680 | 0.04  |
| LM036 | 644416.1 | 8540438.2 | 4.67 | 0.004 | 0.004 | 42  | 35  | 6   | 7  | 75    | 19  | 4   | 1.480 | 0.04  |
| LM038 | 644944.4 | 8536201.5 | 5.10 | 0.014 | 0.004 | 15  | 18  | 2   | 2  | 87    | 11  | 4   | 0.560 | 0.04  |
| LM041 | 642762.7 | 8542166.7 | 5.17 | 0.020 | 0.004 | 22  | 18  | 2   | 6  | 66    | 35  | 4   | 0.580 | 0.04  |
| LM042 | 637152.6 | 8535333.1 | 4.94 | 0.010 | 0.004 | 4   | 7   | 2   | 2  | 26    | 4   | 4   | 0.410 | 0.04  |
| LM043 | 639075.8 | 8537291.2 | 4.90 | 0.013 | 0.004 | 21  | 14  | 2   | 2  | 49    | 17  | 14  | 0.570 | 0.04  |
| LM044 | 639198.9 | 8540364.2 | 4.89 | 0.035 | 0.004 | 4   | 12  | 2   | 2  | 67    | 13  | 12  | 0.350 | 0.04  |
| LM045 | 640970.5 | 8543783.6 | 5.33 | 0.020 | 0.073 | 20  | 12  | 2   | 2  | 78    | 25  | 11  | 0.540 | 0.04  |
| LM046 | 635951.8 | 8544605.6 | 4.79 | 0.004 | 0.004 | 4   | 10  | 2   | 2  | 155   | 10  | 10  | 0.160 | 0.04  |
| LM047 | 641123.8 | 8546292.9 | 4.84 | 0.004 | 0.004 | 17  | 15  | 5   | 2  | 118   | 7   | 11  | 0.330 | 0.04  |
| LM048 | 648560.5 | 8546242.0 | 4.81 | 0.012 | 0.004 | 25  | 21  | 13  | 5  | 801   | 20  | 23  | 0.830 | 0.17  |
| LM050 | 644938.6 | 8546685.8 | 4.45 | 0.018 | 0.004 | 21  | 24  | 8   | 5  | 604   | 10  | 16  | 0.380 | 0.10  |
| LM053 | 641928.2 | 8552494.2 | 4.79 | 0.004 | 0.004 | 27  | 25  | 15  | 2  | 417   | 11  | 13  | 0.850 | 0.88  |
| LM054 | 636591.0 | 8552945.1 | 5.04 | 0.021 | 0.004 | 23  | 15  | 8   | 2  | 204   | 9   | 18  | 0.980 | 0.31  |
| LM055 | 637674.5 | 8552108.4 | 5.02 | 0.004 | 0.004 | 22  | 32  | 6   | 2  | 230   | 9   | 19  | 0.330 | 0.04  |
| LM056 | 637811.2 | 8554891.6 | 4.38 | 0.028 | 0.004 | 67  | 27  | 14  | 14 | 310   | 9   | 20  | 4.920 | 0.76  |

|       |          |           |      |       |        |     |     |    |    |      |      |     |       |       |
|-------|----------|-----------|------|-------|--------|-----|-----|----|----|------|------|-----|-------|-------|
| LM057 | 639684.3 | 8554006.4 | 4.93 | 0.017 | 0.004  | 33  | 11  | 13 | 2  | 348  | 7    | 15  | 1.020 | 0.68  |
| LZ001 | 654301.0 | 8547701.9 | 5.40 | 0.017 | 0.004  | 53  | 90  | 7  | 9  | 182  | 32   | 4   | 2.010 | 0.04  |
| LZ002 | 653227.1 | 8546071.1 | 5.68 | 0.019 | 0.004  | 36  | 45  | 12 | 9  | 342  | 124  | 42  | 1.700 | 0.67  |
| LZ003 | 655275.3 | 8544774.3 | 5.16 | 0.004 | 0.004  | 23  | 26  | 6  | 12 | 89   | 26   | 11  | 0.760 | 0.04  |
| LZ006 | 657341.1 | 8540616.6 | 5.34 | 0.004 | 0.004  | 19  | 33  | 6  | 6  | 39   | 10   | 4   | 0.630 | 0.04  |
| LZ008 | 658953.6 | 8540311.4 | 5.15 | 0.004 | 0.004  | 67  | 48  | 22 | 6  | 76   | 18   | 12  | 2.200 | 0.04  |
| LZ009 | 654348.0 | 8544514.8 | 6.22 | 0.014 | 0.004  | 46  | 51  | 9  | 11 | 141  | 117  | 37  | 1.570 | 0.04  |
| LZ010 | 655608.5 | 8546206.1 | 5.42 | 0.004 | 0.004  | 26  | 21  | 6  | 8  | 103  | 34   | 4   | 0.730 | 0.04  |
| LZ011 | 653130.1 | 8544263.4 | 5.84 | 0.017 | 0.004  | 38  | 78  | 7  | 6  | 84   | 44   | 20  | 1.340 | 0.04  |
| LZ012 | 652925.3 | 8545554.3 | 4.78 | 0.028 | 0.004  | 34  | 36  | 11 | 15 | 597  | 48   | 19  | 1.070 | 0.16  |
| LZ013 | 651469.8 | 8543040.9 | 5.58 | 0.004 | 0.004  | 26  | 28  | 19 | 13 | 281  | 17   | 4   | 0.950 | 0.11  |
| LZ015 | 651830.5 | 8540102.5 | 5.41 | 0.004 | 0.004  | 128 | 127 | 34 | 10 | 58   | 43   | 28  | 4.370 | 0.04  |
| LZ017 | 650442.7 | 8537284.8 | 5.20 | 0.011 | 0.004  | 61  | 32  | 10 | 7  | 71   | 17   | 17  | 1.910 | 0.04  |
| LZ018 | 652323.9 | 8535938.3 | 5.19 | 0.004 | 0.004  | 37  | 23  | 6  | 5  | 58   | 13   | 4   | 1.240 | 0.04  |
| LZ020 | 655899.6 | 8535758.8 | 4.88 | 0.030 | 0.004  | 29  | 23  | 2  | 2  | 74   | 15   | 4   | 0.920 | 0.04  |
| LZ022 | 658341.4 | 8536390.9 | 4.91 | 0.012 | 0.004  | 11  | 24  | 2  | 6  | 28   | 7    | 4   | 0.190 | 0.04  |
| LZ024 | 654236.5 | 8538575.2 | 5.32 | 0.004 | 0.004  | 23  | 24  | 2  | 5  | 45   | 8    | 4   | 0.680 | 0.04  |
| LZ025 | 653537.4 | 8557370.3 | 5.20 | 0.004 | 0.004  | 30  | 29  | 7  | 10 | 65   | 13   | 4   | 0.850 | 0.04  |
| LZ026 | 641024.1 | 8557687.1 | 4.80 | 0.014 | 0.004  | 20  | 14  | 5  | 2  | 242  | 8    | 4   | 0.540 | 0.43  |
| LZ027 | 638421.5 | 8558236.2 | 4.95 | 0.004 | 0.004  | 12  | 8   | 2  | 2  | 185  | 6    | 4   | 0.540 | 0.45  |
| LZ028 | 636000.7 | 8559999.8 | 5.11 | 0.004 | 0.004  | 11  | 6   | 6  | 2  | 169  | 6    | 4   | 0.220 | 0.16  |
| LZ029 | 637773.1 | 8559744.4 | 5.24 | 0.024 | 0.004  | 10  | 7   | 2  | 2  | 159  | 6    | 10  | 0.130 | 0.21  |
| LZ031 | 641285.2 | 8561087.7 | 4.80 | 0.025 | 0.004  | 11  | 13  | 2  | 2  | 97   | 10   | 23  | 0.540 | 0.04  |
| LZ032 | 642397.8 | 8559104.0 | 5.02 | 0.024 | 0.004  | 13  | 9   | 6  | 2  | 164  | 7    | 4   | 0.440 | 0.04  |
| LZ033 | 638496.8 | 8550804.4 | 4.72 | 0.011 | 0.004  | 15  | 13  | 2  | 2  | 200  | 8    | 4   | 0.590 | 0.21  |
| LZ035 | 641395.8 | 8551674.6 | 6.10 | 0.042 | 0.012  | 45  | 47  | 15 | 10 | 296  | 38   | 22  | 1.560 | 0.21  |
| NB001 | 684153.0 | 8563610.4 | 7.56 | 0.011 | 3.916  | 90  | 28  | 18 | 23 | 56   | 33   | 30  | 3.050 | 4.28  |
| NB002 | 685953.8 | 8563178.9 | 7.16 | 0.015 | 0.470  | 52  | 25  | 7  | 14 | 33   | 23   | 75  | 1.100 | 0.68  |
| NB004 | 668235.0 | 8565240.0 | 5.60 | 0.021 | 0.004  | 89  | 26  | 18 | 19 | 32   | 29   | 50  | 2.540 | 4.46  |
| NB005 | 685382.3 | 8568580.4 | 5.35 | 0.021 | 0.004  | 131 | 36  | 11 | 20 | 42   | 165  | 75  | 3.360 | 7.53  |
| NB006 | 689867.3 | 8565241.8 | 5.54 | 0.012 | 0.004  | 57  | 26  | 6  | 11 | 16   | 17   | 11  | 1.730 | 3.14  |
| NI001 | 675815.5 | 8580259.1 | 5.39 | 0.023 | 0.004  | 209 | 50  | 12 | 19 | 43   | 35   | 35  | 5.490 | 15.19 |
| NI002 | 676269.1 | 8579604.5 | 5.25 | 0.024 | 0.004  | 184 | 45  | 13 | 17 | 40   | 48   | 26  | 4.750 | 14.15 |
| NI003 | 676916.2 | 8577357.5 | 6.11 | 0.020 | 0.004  | 111 | 36  | 12 | 11 | 26   | 38   | 20  | 3.610 | 7.38  |
| NI004 | 679949.7 | 8576403.8 | 4.48 | 0.019 | 0.004  | 102 | 38  | 9  | 11 | 24   | 57   | 23  | 2.880 | 8.15  |
| NI005 | 682625.7 | 8579125.5 | 4.75 | 0.004 | 0.010  | 33  | 17  | 5  | 5  | 15   | 12   | 4   | 1.440 | 5.62  |
| NI006 | 685042.4 | 8571411.4 | 5.04 | 0.012 | 0.004  | 173 | 59  | 12 | 24 | 41   | 88   | 53  | 4.400 | 12.08 |
| NI007 | 683348.9 | 8573579.4 | 5.19 | 0.022 | 0.004  | 76  | 35  | 13 | 9  | 22   | 58   | 35  | 2.800 | 6.55  |
| NI008 | 681327.3 | 8575037.9 | 4.39 | 0.022 | 0.004  | 107 | 42  | 10 | 15 | 26   | 80   | 42  | 3.520 | 9.93  |
| NI009 | 678189.6 | 8572143.2 | 5.16 | 0.011 | 0.004  | 63  | 28  | 6  | 8  | 38   | 79   | 29  | 3.110 | 3.96  |
| NI010 | 678859.1 | 8571003.8 | 5.10 | 0.023 | 0.004  | 60  | 32  | 8  | 8  | 39   | 60   | 25  | 2.680 | 2.97  |
| NI011 | 685533.3 | 8569680.0 | 5.05 | 0.033 | 0.300  | 117 | 55  | 10 | 15 | 45   | 73   | 72  | 3.790 | 10.46 |
| NI012 | 687029.5 | 8570556.6 | 5.07 | 0.004 | 0.004  | 43  | 26  | 6  | 8  | 20   | 16   | 13  | 1.320 | 3.35  |
| NI013 | 687049.2 | 8571918.3 | 5.42 | 0.029 | 0.004  | 25  | 17  | 7  | 8  | 23   | 18   | 10  | 1.200 | 3.21  |
| NI014 | 685851.0 | 8574206.6 | 5.27 | 0.004 | 0.004  | 21  | 16  | 8  | 12 | 18   | 24   | 11  | 1.380 | 1.80  |
| NI015 | 679948.7 | 8578417.0 | 4.74 | 0.021 | 0.011  | 163 | 51  | 10 | 16 | 33   | 60   | 32  | 4.580 | 8.50  |
| NI016 | 683041.5 | 8576416.9 | 5.21 | 0.023 | 0.004  | 35  | 25  | 2  | 6  | 18   | 13   | 11  | 1.550 | 3.64  |
| NI017 | 675326.2 | 8578542.9 | 5.22 | 0.043 | 0.017  | 146 | 48  | 12 | 14 | 51   | 30   | 29  | 2.750 | 4.53  |
| NI018 | 676224.3 | 8576467.6 | 6.06 | 0.027 | 0.004  | 109 | 27  | 17 | 17 | 39   | 53   | 20  | 4.010 | 6.78  |
| NI019 | 679748.1 | 8571090.4 | 5.28 | 0.027 | 0.004  | 96  | 29  | 8  | 7  | 34   | 135  | 208 | 2.980 | 3.64  |
| NI020 | 679427.1 | 8569951.3 | 5.42 | 0.012 | 0.016  | 58  | 19  | 6  | 2  | 43   | 43   | 20  | 2.320 | 3.67  |
| NI021 | 681437.1 | 8570144.1 | 5.04 | 0.032 | 0.004  | 87  | 27  | 13 | 16 | 36   | 33   | 26  | 2.780 | 2.61  |
| NI022 | 680395.6 | 8568476.4 | 7.31 | 0.042 | 0.804  | 37  | 23  | 7  | 2  | 60   | 221  | 53  | 1.570 | 2.42  |
| NI023 | 679887.0 | 8566547.6 | 7.52 | 0.025 | 0.578  | 47  | 21  | 14 | 9  | 1063 | 802  | 35  | 1.810 | 3.92  |
| NI025 | 682431.4 | 8563472.7 | 7.48 | 0.030 | 0.698  | 48  | 20  | 15 | 17 | 140  | 19   | 18  | 1.550 | 1.62  |
| NI026 | 680235.1 | 8564657.3 | 7.50 | 0.071 | 2.043  | 51  | 28  | 13 | 9  | 79   | 51   | 18  | 2.400 | 3.95  |
| NI027 | 681003.5 | 8566859.3 | 8.18 | 0.083 | 11.299 | 32  | 19  | 10 | 11 | 271  | 1231 | 122 | 0.910 | 2.09  |
| NI028 | 683971.6 | 8569344.4 | 5.63 | 0.040 | 0.004  | 134 | 53  | 18 | 16 | 40   | 500  | 218 | 2.930 | 9.14  |
| NI029 | 686142.4 | 8566903.9 | 5.85 | 0.053 | 0.042  | 73  | 40  | 6  | 12 | 49   | 172  | 284 | 1.100 | 0.71  |
| NV001 | 663176.8 | 8582168.0 | 5.05 | 0.023 | 0.004  | 29  | 11  | 8  | 2  | 81   | 15   | 4   | 0.890 | 0.28  |
| NV003 | 663206.7 | 8584800.1 | 4.68 | 0.027 | 0.004  | 25  | 17  | 7  | 2  | 163  | 23   | 10  | 1.270 | 1.65  |

|       |          |           |      |       |       |     |    |    |    |     |     |     |       |      |
|-------|----------|-----------|------|-------|-------|-----|----|----|----|-----|-----|-----|-------|------|
| NV004 | 666224.1 | 8580357.3 | 5.51 | 0.024 | 0.004 | 39  | 20 | 8  | 2  | 129 | 21  | 16  | 1.710 | 1.25 |
| NV005 | 664411.1 | 8578244.2 | 5.26 | 0.012 | 0.004 | 18  | 15 | 2  | 2  | 79  | 14  | 4   | 1.010 | 0.32 |
| NV007 | 666233.3 | 8578056.4 | 4.98 | 0.004 | 0.004 | 11  | 6  | 2  | 2  | 15  | 6   | 4   | 0.200 | 0.11 |
| NV008 | 667170.8 | 8576419.5 | 5.25 | 0.004 | 0.004 | 14  | 9  | 2  | 2  | 23  | 9   | 4   | 0.340 | 0.04 |
| NV009 | 668420.8 | 8574355.5 | 4.98 | 0.015 | 0.004 | 4   | 10 | 2  | 2  | 34  | 8   | 4   | 0.200 | 0.11 |
| NV010 | 665504.6 | 8574319.1 | 5.17 | 0.004 | 0.011 | 10  | 9  | 2  | 2  | 43  | 7   | 4   | 0.530 | 0.14 |
| NV011 | 664443.3 | 8572992.9 | 4.99 | 0.004 | 0.004 | 4   | 5  | 2  | 2  | 22  | 5   | 4   | 0.270 | 0.04 |
| NV013 | 668523.7 | 8572628.5 | 5.82 | 0.010 | 0.004 | 25  | 12 | 2  | 2  | 43  | 10  | 4   | 0.810 | 0.28 |
| NV014 | 666547.6 | 8571641.1 | 5.36 | 0.004 | 0.004 | 12  | 8  | 2  | 2  | 29  | 7   | 4   | 0.230 | 0.04 |
| NV015 | 664617.3 | 8570348.2 | 5.25 | 0.004 | 0.004 | 13  | 8  | 2  | 2  | 50  | 7   | 4   | 0.570 | 0.11 |
| NV016 | 670120.5 | 8571578.3 | 5.04 | 0.012 | 0.004 | 12  | 5  | 2  | 2  | 16  | 6   | 4   | 0.280 | 0.14 |
| NV017 | 668225.7 | 8569833.3 | 5.06 | 0.004 | 0.004 | 13  | 4  | 2  | 2  | 17  | 5   | 4   | 0.230 | 0.04 |
| NV018 | 667144.8 | 8568008.8 | 5.54 | 0.012 | 0.004 | 16  | 11 | 2  | 2  | 22  | 16  | 4   | 0.430 | 0.14 |
| NV019 | 666519.9 | 8566486.2 | 5.42 | 0.018 | 0.004 | 24  | 13 | 2  | 8  | 30  | 9   | 4   | 0.680 | 0.21 |
| NV020 | 664230.4 | 8565779.9 | 4.98 | 0.019 | 0.004 | 12  | 6  | 2  | 2  | 21  | 6   | 4   | 0.370 | 0.11 |
| NV022 | 663378.9 | 8564709.6 | 5.16 | 0.004 | 0.004 | 11  | 5  | 2  | 2  | 26  | 8   | 4   | 0.230 | 0.04 |
| NV024 | 666325.8 | 8564781.0 | 5.68 | 0.011 | 0.004 | 26  | 53 | 5  | 6  | 41  | 9   | 12  | 0.300 | 0.04 |
| NV025 | 668431.8 | 8565108.9 | 5.28 | 0.015 | 0.004 | 25  | 16 | 2  | 2  | 21  | 8   | 4   | 0.980 | 0.04 |
| NV026 | 668395.4 | 8562801.7 | 5.32 | 0.010 | 0.004 | 28  | 18 | 10 | 7  | 42  | 8   | 4   | 0.990 | 0.21 |
| NV027 | 670382.5 | 8562891.6 | 4.62 | 0.014 | 0.004 | 22  | 19 | 2  | 8  | 48  | 8   | 4   | 0.960 | 0.21 |
| NV029 | 671238.9 | 8564276.8 | 5.69 | 0.004 | 0.004 | 22  | 15 | 2  | 2  | 20  | 8   | 4   | 0.830 | 0.11 |
| NV030 | 677139.9 | 8565982.7 | 7.67 | 0.054 | 0.630 | 40  | 47 | 19 | 9  | 256 | 52  | 47  | 1.950 | 1.10 |
| NV031 | 678507.7 | 8563902.3 | 7.17 | 0.051 | 0.381 | 45  | 29 | 16 | 8  | 255 | 135 | 38  | 1.900 | 1.28 |
| NV032 | 678761.9 | 8565662.8 | 8.33 | 0.071 | 3.048 | 38  | 43 | 34 | 9  | 405 | 111 | 88  | 1.380 | 1.93 |
| NV033 | 671175.5 | 8570125.4 | 5.28 | 0.004 | 0.004 | 29  | 23 | 2  | 6  | 25  | 11  | 4   | 1.110 | 0.21 |
| NV035 | 670483.9 | 8568830.0 | 5.38 | 0.004 | 0.004 | 17  | 7  | 2  | 6  | 29  | 9   | 4   | 0.600 | 0.04 |
| NV036 | 672096.0 | 8569203.9 | 6.82 | 0.004 | 0.010 | 18  | 10 | 2  | 2  | 17  | 6   | 4   | 0.600 | 0.04 |
| NV038 | 673094.9 | 8566534.7 | 5.81 | 0.022 | 0.004 | 47  | 59 | 9  | 9  | 52  | 35  | 10  | 2.160 | 1.83 |
| NV039 | 673756.2 | 8567696.6 | 5.65 | 0.004 | 0.004 | 19  | 22 | 5  | 2  | 28  | 6   | 4   | 0.940 | 0.18 |
| NV041 | 673036.3 | 8564560.5 | 6.32 | 0.014 | 0.010 | 33  | 17 | 5  | 2  | 53  | 19  | 10  | 1.290 | 1.41 |
| NV042 | 672518.1 | 8563404.5 | 7.16 | 0.004 | 0.081 | 29  | 15 | 9  | 2  | 44  | 30  | 4   | 1.170 | 0.62 |
| NV045 | 674226.4 | 8564020.7 | 6.25 | 0.017 | 0.004 | 23  | 17 | 6  | 5  | 41  | 14  | 4   | 0.820 | 0.69 |
| NV046 | 674283.4 | 8565741.9 | 6.44 | 0.014 | 0.004 | 19  | 20 | 5  | 2  | 15  | 6   | 4   | 0.610 | 0.15 |
| NV047 | 678869.9 | 8562968.3 | 6.57 | 0.023 | 0.092 | 53  | 13 | 12 | 24 | 119 | 21  | 13  | 1.130 | 0.83 |
| NV048 | 676023.0 | 8572087.7 | 5.62 | 0.004 | 0.004 | 24  | 11 | 8  | 5  | 93  | 23  | 10  | 1.040 | 0.79 |
| NV049 | 674831.2 | 8573065.1 | 5.41 | 0.023 | 0.004 | 37  | 15 | 5  | 2  | 75  | 14  | 12  | 1.300 | 1.67 |
| NV050 | 674122.3 | 8575306.2 | 5.28 | 0.012 | 0.004 | 73  | 33 | 10 | 2  | 37  | 13  | 4   | 3.020 | 2.77 |
| NV051 | 673004.1 | 8574145.4 | 5.32 | 0.010 | 0.004 | 27  | 15 | 2  | 5  | 47  | 11  | 4   | 1.290 | 2.81 |
| NV052 | 672341.1 | 8572513.4 | 5.32 | 0.012 | 0.011 | 4   | 12 | 2  | 6  | 19  | 7   | 4   | 0.510 | 0.21 |
| NV053 | 676876.3 | 8568772.6 | 6.73 | 0.030 | 0.019 | 21  | 14 | 5  | 6  | 39  | 51  | 20  | 1.030 | 0.46 |
| NV054 | 676830.8 | 8570125.8 | 7.04 | 0.020 | 0.115 | 47  | 27 | 7  | 9  | 39  | 38  | 14  | 2.070 | 0.89 |
| NV055 | 675936.5 | 8569170.2 | 6.07 | 0.014 | 0.010 | 16  | 16 | 6  | 6  | 21  | 11  | 4   | 0.800 | 0.21 |
| NV056 | 674834.7 | 8568902.0 | 7.23 | 0.036 | 0.146 | 42  | 25 | 5  | 8  | 50  | 151 | 117 | 1.920 | 0.68 |
| NV057 | 674159.7 | 8570617.5 | 6.14 | 0.029 | 0.004 | 19  | 21 | 2  | 5  | 32  | 58  | 14  | 1.290 | 0.64 |
| NV058 | 678589.0 | 8568493.4 | 7.33 | 0.004 | 0.035 | 19  | 36 | 5  | 2  | 26  | 24  | 10  | 1.950 | 0.68 |
| NV059 | 678303.4 | 8566918.4 | 7.29 | 0.066 | 1.196 | 37  | 31 | 12 | 7  | 105 | 53  | 27  | 1.640 | 1.02 |
| NV060 | 677041.5 | 8563157.2 | 7.31 | 0.026 | 0.201 | 63  | 36 | 37 | 12 | 177 | 70  | 37  | 3.300 | 1.08 |
| NV061 | 674999.9 | 8563048.3 | 7.09 | 0.016 | 0.233 | 31  | 18 | 5  | 2  | 59  | 59  | 31  | 1.390 | 0.89 |
| NV062 | 676187.8 | 8565097.3 | 6.20 | 0.022 | 0.004 | 15  | 15 | 2  | 5  | 20  | 9   | 4   | 0.290 | 0.16 |
| NV063 | 677063.8 | 8566751.6 | 7.13 | 0.033 | 0.092 | 43  | 40 | 11 | 2  | 67  | 46  | 35  | 2.010 | 0.85 |
| NV064 | 676238.6 | 8565910.0 | 6.77 | 0.053 | 0.192 | 34  | 30 | 23 | 11 | 282 | 38  | 15  | 1.210 | 0.76 |
| NV066 | 670119.0 | 8565569.9 | 5.89 | 0.004 | 0.004 | 21  | 8  | 10 | 2  | 26  | 471 | 4   | 0.530 | 0.34 |
| NV067 | 669898.2 | 8567294.5 | 5.21 | 0.004 | 0.004 | 21  | 9  | 2  | 2  | 20  | 7   | 4   | 0.440 | 0.21 |
| NV068 | 675886.4 | 8567750.6 | 7.28 | 0.033 | 1.785 | 33  | 29 | 6  | 7  | 70  | 77  | 20  | 0.880 | 0.89 |
| WI001 | 688446.3 | 8562055.3 | 5.06 | 0.011 | 0.004 | 114 | 33 | 11 | 11 | 38  | 28  | 25  | 4.42  | 5.41 |
| WI002 | 685689.9 | 8561609.6 | 5.98 | 0.004 | 0.004 | 82  | 33 | 12 | 11 | 37  | 33  | 18  | 4.47  | 3.67 |
| WI003 | 682734.7 | 8561815.0 | 6.52 | 0.004 | 0.004 | 74  | 25 | 13 | 11 | 672 | 26  | 16  | 3.05  | 3.30 |
| WI004 | 680822.6 | 8561647.5 | 7.29 | 0.022 | 0.544 | 36  | 20 | 10 | 2  | 96  | 56  | 28  | 1.30  | 1.09 |
| WI005 | 679653.6 | 8561481.5 | 6.15 | 0.004 | 0.004 | 16  | 8  | 12 | 8  | 144 | 24  | 13  | 0.37  | 0.33 |
| WI006 | 681059.5 | 8560007.4 | 5.08 | 0.004 | 0.004 | 60  | 23 | 19 | 5  | 158 | 12  | 11  | 2.50  | 1.22 |
| WI007 | 684478.9 | 8560858.3 | 5.84 | 0.016 | 0.004 | 71  | 19 | 5  | 2  | 27  | 14  | 4   | 2.72  | 0.36 |

|       |          |           |      |       |       |     |    |    |    |     |     |    |      |      |
|-------|----------|-----------|------|-------|-------|-----|----|----|----|-----|-----|----|------|------|
| WI008 | 684068.4 | 8560166.6 | 7.07 | 0.020 | 0.062 | 96  | 29 | 12 | 5  | 67  | 31  | 18 | 3.76 | 0.68 |
| WI009 | 683695.9 | 8557810.8 | 4.85 | 0.004 | 0.004 | 32  | 21 | 5  | 10 | 63  | 14  | 4  | 0.95 | 0.21 |
| WI010 | 681974.8 | 8556972.6 | 5.20 | 0.004 | 0.010 | 46  | 45 | 5  | 9  | 41  | 14  | 4  | 1.62 | 0.18 |
| WI011 | 680168.3 | 8552914.7 | 5.13 | 0.004 | 0.004 | 34  | 78 | 23 | 23 | 23  | 27  | 4  | 1.24 | 0.24 |
| WI012 | 677515.4 | 8553067.5 | 5.12 | 0.010 | 0.004 | 20  | 22 | 2  | 2  | 21  | 9   | 4  | 0.71 | 0.24 |
| WI014 | 675775.9 | 8556346.2 | 5.39 | 0.004 | 0.004 | 12  | 24 | 2  | 2  | 17  | 7   | 4  | 0.60 | 0.15 |
| WI015 | 677342.9 | 8559218.1 | 5.40 | 0.013 | 0.004 | 19  | 11 | 2  | 2  | 42  | 11  | 15 | 1.14 | 0.80 |
| WI016 | 678209.3 | 8560213.4 | 6.04 | 0.004 | 0.004 | 39  | 15 | 7  | 2  | 100 | 17  | 14 | 1.66 | 1.22 |
| WI018 | 679096.7 | 8559395.1 | 5.33 | 0.004 | 0.004 | 19  | 12 | 2  | 2  | 59  | 10  | 4  | 0.87 | 0.52 |
| WI019 | 681131.5 | 8559853.1 | 5.72 | 0.022 | 0.004 | 55  | 22 | 44 | 6  | 709 | 20  | 16 | 2.40 | 1.21 |
| WI020 | 675728.1 | 8560274.5 | 7.78 | 0.004 | 0.333 | 30  | 18 | 2  | 2  | 39  | 17  | 4  | 1.32 | 0.68 |
| WI022 | 674044.1 | 8561441.0 | 5.74 | 0.017 | 0.004 | 17  | 13 | 11 | 2  | 53  | 11  | 4  | 1.53 | 1.54 |
| WI023 | 676480.3 | 8560674.1 | 7.35 | 0.027 | 0.165 | 37  | 29 | 6  | 2  | 50  | 255 | 31 | 1.50 | 0.80 |
| WI024 | 677916.4 | 8561725.6 | 6.68 | 0.029 | 0.004 | 28  | 11 | 16 | 7  | 289 | 31  | 20 | 1.06 | 1.54 |
| WI025 | 676512.7 | 8561987.2 | 6.47 | 0.040 | 0.004 | 78  | 31 | 12 | 7  | 56  | 26  | 16 | 2.64 | 0.43 |
| WI026 | 667253.0 | 8562006.2 | 4.85 | 0.010 | 0.004 | 73  | 37 | 7  | 5  | 53  | 13  | 11 | 2.17 | 0.27 |
| WI027 | 663274.2 | 8559879.6 | 5.52 | 0.026 | 0.004 | 29  | 23 | 5  | 2  | 123 | 20  | 11 | 1.13 | 0.37 |
| WI029 | 664952.7 | 8556802.3 | 5.07 | 0.020 | 0.004 | 22  | 25 | 2  | 5  | 39  | 13  | 4  | 1.00 | 0.04 |
| WI031 | 665120.6 | 8557063.4 | 4.89 | 0.004 | 0.004 | 30  | 32 | 2  | 7  | 30  | 12  | 4  | 1.28 | 0.12 |
| WI032 | 668296.3 | 8556765.3 | 5.07 | 0.004 | 0.004 | 28  | 29 | 2  | 7  | 37  | 17  | 4  | 1.09 | 0.04 |
| WI033 | 671034.1 | 8557245.8 | 5.27 | 0.004 | 0.004 | 20  | 24 | 2  | 8  | 29  | 10  | 4  | 0.79 | 0.12 |
| WI035 | 672132.8 | 8559985.5 | 4.78 | 0.023 | 0.004 | 20  | 21 | 2  | 7  | 21  | 7   | 4  | 0.65 | 0.04 |
| WI037 | 670692.9 | 8561465.4 | 5.27 | 0.018 | 0.004 | 32  | 25 | 6  | 9  | 44  | 13  | 14 | 1.43 | 0.04 |
| WI039 | 687039.2 | 8558411.6 | 5.13 | 0.016 | 0.004 | 15  | 16 | 2  | 2  | 320 | 24  | 4  | 0.38 | 0.66 |
| WI041 | 688336.2 | 8557258.0 | 4.74 | 0.013 | 0.045 | 24  | 12 | 2  | 2  | 71  | 16  | 4  | 0.78 | 1.16 |
| WI043 | 687079.3 | 8557709.9 | 5.10 | 0.013 | 0.004 | 31  | 17 | 2  | 2  | 24  | 14  | 4  | 1.16 | 0.70 |
| WI044 | 686509.8 | 8557275.9 | 5.25 | 0.020 | 0.004 | 102 | 68 | 17 | 6  | 56  | 17  | 4  | 3.73 | 0.95 |
| WV001 | 684182.7 | 8555115.6 | 5.35 | 0.016 | 0.004 | 25  | 34 | 14 | 11 | 67  | 13  | 10 | 0.73 | 0.12 |
| WV003 | 689242.1 | 8552599.0 | 4.99 | 0.004 | 0.004 | 12  | 18 | 2  | 2  | 40  | 9   | 4  | 0.50 | 0.23 |
| WV004 | 688888.4 | 8550131.6 | 4.52 | 0.014 | 0.004 | 43  | 41 | 8  | 13 | 48  | 19  | 11 | 1.62 | 0.16 |
| WV005 | 684105.8 | 8552985.4 | 5.08 | 0.004 | 0.004 | 40  | 40 | 8  | 8  | 39  | 16  | 4  | 1.35 | 0.19 |
| WV007 | 683982.4 | 8548598.4 | 5.36 | 0.012 | 0.004 | 35  | 53 | 21 | 8  | 93  | 55  | 23 | 1.36 | 0.27 |
| WV009 | 684360.9 | 8544124.6 | 5.17 | 0.004 | 0.004 | 38  | 13 | 11 | 9  | 38  | 12  | 4  | 1.39 | 0.37 |
| WV010 | 689171.9 | 8545215.7 | 4.86 | 0.017 | 0.004 | 15  | 27 | 6  | 7  | 26  | 14  | 4  | 0.80 | 0.30 |
| WV011 | 683911.2 | 8539365.7 | 4.91 | 0.022 | 0.004 | 25  | 15 | 2  | 2  | 17  | 6   | 4  | 0.56 | 0.04 |
| WV014 | 688340.0 | 8539301.3 | 4.59 | 0.004 | 0.004 | 14  | 21 | 5  | 9  | 18  | 7   | 4  | 0.44 | 0.04 |
| WV016 | 689296.6 | 8536195.0 | 4.54 | 0.004 | 0.004 | 17  | 13 | 2  | 2  | 13  | 5   | 4  | 0.28 | 0.04 |
| WM001 | 673313.4 | 8553625.1 | 5.86 | 0.014 | 0.012 | 66  | 35 | 15 | 8  | 68  | 46  | 22 | 2.19 | 0.31 |
| WM003 | 673307.0 | 8550083.2 | 5.06 | 0.004 | 0.004 | 35  | 19 | 8  | 12 | 29  | 18  | 4  | 1.40 | 0.36 |
| WM005 | 675407.5 | 8548223.8 | 5.24 | 0.004 | 0.004 | 18  | 18 | 2  | 2  | 23  | 11  | 4  | 0.94 | 0.46 |
| WM006 | 672495.1 | 8544631.7 | 5.19 | 0.004 | 0.004 | 24  | 31 | 10 | 8  | 25  | 14  | 4  | 1.14 | 0.12 |
| WM008 | 675073.4 | 8545875.3 | 5.25 | 0.004 | 0.004 | 17  | 18 | 2  | 5  | 16  | 6   | 4  | 0.68 | 0.04 |
| WM009 | 675054.0 | 8540257.3 | 4.97 | 0.004 | 0.004 | 29  | 10 | 7  | 6  | 44  | 22  | 4  | 1.09 | 0.04 |
| WM010 | 675952.4 | 8538253.8 | 5.11 | 0.004 | 0.010 | 19  | 9  | 2  | 7  | 29  | 12  | 4  | 0.55 | 0.04 |
| WM012 | 679948.4 | 8535698.4 | 4.97 | 0.004 | 0.004 | 33  | 12 | 2  | 6  | 27  | 15  | 4  | 1.33 | 0.12 |
| WM013 | 681988.6 | 8538207.4 | 4.77 | 0.004 | 0.004 | 15  | 9  | 2  | 2  | 16  | 8   | 4  | 0.62 | 0.04 |
| WZ001 | 680795.6 | 8547161.7 | 5.38 | 0.004 | 0.004 | 69  | 29 | 26 | 22 | 43  | 22  | 4  | 2.57 | 0.16 |
| WZ002 | 679941.5 | 8545217.0 | 4.94 | 0.010 | 0.004 | 23  | 17 | 2  | 8  | 28  | 12  | 4  | 0.96 | 0.16 |
| WZ004 | 680564.0 | 8540751.7 | 5.34 | 0.004 | 0.004 | 4   | 9  | 2  | 2  | 9   | 6   | 4  | 0.26 | 0.12 |
| WZ007 | 685517.2 | 8536926.9 | 4.81 | 0.004 | 0.004 | 11  | 9  | 2  | 2  | 11  | 6   | 4  | 0.31 | 0.21 |
| WZ008 | 672428.4 | 8541282.1 | 4.74 | 0.004 | 0.010 | 10  | 8  | 5  | 5  | 21  | 12  | 4  | 0.41 | 0.12 |
| WZ010 | 667439.1 | 8547888.3 | 5.10 | 0.004 | 0.004 | 16  | 12 | 2  | 5  | 22  | 10  | 4  | 0.51 | 0.04 |
| WZ011 | 665658.3 | 8549312.2 | 4.77 | 0.004 | 0.004 | 28  | 28 | 2  | 5  | 33  | 16  | 4  | 1.65 | 0.04 |
| WZ012 | 663100.5 | 8552233.3 | 4.83 | 0.012 | 0.004 | 18  | 19 | 6  | 15 | 42  | 14  | 4  | 0.55 | 0.04 |
| WZ014 | 668189.6 | 8552442.7 | 5.50 | 0.016 | 0.004 | 25  | 19 | 5  | 11 | 36  | 16  | 4  | 0.78 | 0.04 |
| WZ016 | 673033.3 | 8537384.1 | 5.00 | 0.004 | 0.004 | 34  | 21 | 5  | 8  | 30  | 15  | 4  | 1.06 | 0.04 |
| WZ018 | 671436.8 | 8536003.0 | 5.14 | 0.004 | 0.004 | 14  | 10 | 2  | 2  | 24  | 11  | 4  | 0.49 | 0.04 |
| WZ020 | 668341.8 | 8540674.1 | 5.40 | 0.004 | 0.004 | 21  | 9  | 5  | 2  | 19  | 19  | 4  | 0.78 | 0.04 |
| WZ023 | 662878.4 | 8537396.0 | 5.02 | 0.004 | 0.004 | 21  | 11 | 5  | 8  | 37  | 14  | 4  | 0.88 | 0.04 |
| WZ024 | 668396.7 | 8543698.7 | 5.48 | 0.004 | 0.004 | 32  | 29 | 9  | 10 | 27  | 19  | 4  | 1.11 | 0.04 |
| WZ025 | 663652.4 | 8541823.0 | 5.16 | 0.004 | 0.004 | 16  | 11 | 6  | 7  | 34  | 12  | 4  | 0.71 | 0.04 |

|        |          |           |        |       |       |     |    |       |      |     |       |        |      |      |
|--------|----------|-----------|--------|-------|-------|-----|----|-------|------|-----|-------|--------|------|------|
| WZ026  | 663175.7 | 8545795.4 | 5.12   | 0.004 | 0.004 | 29  | 33 | 5     | 11   | 41  | 15    | 4      | 0.98 | 0.04 |
| Max    | 9.17     | 1.423     | 11.299 | 227   | 595   | 606 | 64 | 41900 | 1231 | 503 | 7.130 | 254.90 |      |      |
| Median | 5.06     | 0.017     | 0.056  | 23    | 17    | 8   | 2  | 212   | 14   | 4   | 1.000 | 0.42   |      |      |
| Min    | 3.56     | 0.004     | 0.004  | 4     | 2     | 2   | 1  | 9     | 2    | 4   | 0.100 | 0.04   |      |      |

**Table S2.** The location, pH, S<sub>tot</sub>, CO<sub>2</sub> (carbonates) and selected elements in the deeper soil horizon (the depth of 70 to 90 cm) of the surveyed part of the Copperbelt province, Zambia. Concentrations of S<sub>tot</sub>, CO<sub>2</sub> and Fe in wt.%, concentration of other elements in mg/kg.

| Sample | X                 | Y    | pH    | S tot | CO2 | V   | Cr | Co  | Ni   | Cu  | Zn | Pb    | Fe   | As |
|--------|-------------------|------|-------|-------|-----|-----|----|-----|------|-----|----|-------|------|----|
| BB004  | 583918.98621892.2 | 4.16 | 0.010 | 0.040 | 57  | 66  | 2  | 13  | 25   | 63  | 4  | 3.89  | 1.83 |    |
| BB011  | 588166.08621945.4 | 4.07 | 0.010 | 0.030 | 41  | 33  | 2  | 6   | 17   | 26  | 4  | 1.96  | 0.60 |    |
| BB031  | 587917.58629563.8 | 4.12 | 0.004 | 0.050 | 116 | 62  | 2  | 13  | 29   | 40  | 4  | 4.26  | 3.52 |    |
| BB036  | 592292.38619549.9 | 4.09 | 0.004 | 0.004 | 26  | 44  | 2  | 15  | 12   | 54  | 4  | 2.20  | 0.69 |    |
| BB042  | 590741.28630350.0 | 4.77 | 0.004 | 0.010 | 28  | 55  | 9  | 27  | 270  | 55  | 4  | 1.92  | 0.60 |    |
| BB057  | 582247.08639017.7 | 4.13 | 0.004 | 0.020 | 67  | 43  | 2  | 10  | 21   | 49  | 4  | 3.36  | 1.05 |    |
| BK002  | 598305.08628928.4 | 4.25 | 0.020 | 0.030 | 32  | 29  | 5  | 12  | 28   | 41  | 11 | 1.54  | 0.28 |    |
| BK010  | 586281.08643807.0 | 4.34 | 0.004 | 0.040 | 119 | 51  | 5  | 15  | 39   | 105 | 4  | 3.48  | 2.71 |    |
| BP001  | 602580.58618388.2 | 4.19 | 0.010 | 0.060 | 102 | 256 | 17 | 132 | 30   | 9   | 21 | 6.28  | 4.09 |    |
| BP031  | 607454.08631768.0 | 4.17 | 0.010 | 0.020 | 18  | 33  | 5  | 18  | 44   | 43  | 4  | 0.93  | 0.31 |    |
| BP032  | 602198.08637474.0 | 4.30 | 0.010 | 0.040 | 70  | 39  | 5  | 9   | 17   | 27  | 4  | 3.30  | 0.69 |    |
| BP038  | 599678.08640232.0 | 4.38 | 0.004 | 0.040 | 60  | 48  | 2  | 18  | 24   | 70  | 12 | 2.09  | 0.89 |    |
| BP042  | 595335.08637914.0 | 4.23 | 0.004 | 0.040 | 108 | 114 | 2  | 20  | 28   | 57  | 12 | 5.13  | 4.02 |    |
| BP045  | 591361.08642832.0 | 4.50 | 0.004 | 0.070 | 140 | 87  | 10 | 17  | 29   | 43  | 16 | 5.99  | 6.35 |    |
| BP049  | 595268.08644476.0 | 4.39 | 0.004 | 0.050 | 173 | 109 | 2  | 22  | 28   | 39  | 4  | 6.72  | 7.93 |    |
| CK002  | 583300.08597209.0 | 4.37 | 0.004 | 0.080 | 160 | 123 | 38 | 37  | 47   | 40  | 21 | 6.84  | 0.82 |    |
| CS001  | 585345.08591700.0 | 4.00 | 0.024 | 0.040 | 118 | 85  | 14 | 37  | 105  | 10  | 4  | 4.02  | 0.04 |    |
| CS004  | 586111.08595126.0 | 4.36 | 0.014 | 0.060 | 138 | 60  | 47 | 43  | 100  | 10  | 4  | 4.27  | 0.10 |    |
| CS019  | 603687.08599444.0 | 4.16 | 0.014 | 0.040 | 43  | 47  | 8  | 17  | 41   | 8   | 4  | 2.17  | 0.28 |    |
| CS025  | 601490.08591574.0 | 4.83 | 0.020 | 0.080 | 159 | 116 | 32 | 35  | 62   | 19  | 4  | 6.35  | 0.89 |    |
| CS027  | 606230.08606144.0 | 3.91 | 0.016 | 0.030 | 23  | 29  | 2  | 9   | 15   | 8   | 4  | 1.13  | 0.31 |    |
| CS031  | 604765.08610346.0 | 4.31 | 0.017 | 0.040 | 76  | 76  | 5  | 29  | 40   | 10  | 4  | 3.60  | 1.70 |    |
| CS037  | 603262.08615624.0 | 4.12 | 0.011 | 0.030 | 16  | 36  | 2  | 18  | 19   | 10  | 4  | 0.89  | 0.28 |    |
| CS042  | 601040.08614416.0 | 4.07 | 0.030 | 0.030 | 18  | 150 | 2  | 98  | 65   | 18  | 31 | 2.23  | 1.64 |    |
| CS045  | 607254.08598952.0 | 4.25 | 0.022 | 0.050 | 271 | 77  | 43 | 33  | 215  | 41  | 4  | 8.51  | 0.16 |    |
| CS047  | 607714.08594502.0 | 5.39 | 0.019 | 0.090 | 272 | 111 | 42 | 40  | 143  | 15  | 4  | 8.80  | 0.07 |    |
| CS048  | 605912.08594158.0 | 4.02 | 0.011 | 0.050 | 101 | 70  | 19 | 31  | 66   | 6   | 4  | 3.35  | 0.04 |    |
| CS058  | 596236.08599864.0 | 4.52 | 0.004 | 0.030 | 63  | 77  | 17 | 18  | 59   | 7   | 4  | 2.49  | 0.61 |    |
| CS062  | 592674.08597994.0 | 4.64 | 0.004 | 0.040 | 58  | 103 | 2  | 15  | 17   | 8   | 4  | 3.66  | 2.40 |    |
| CS065  | 592946.08595476.0 | 4.35 | 0.004 | 0.010 | 19  | 58  | 2  | 21  | 12   | 12  | 4  | 1.57  | 1.26 |    |
| CS072  | 583991.08614578.0 | 4.35 | 0.004 | 0.040 | 69  | 62  | 6  | 19  | 23   | 16  | 4  | 4.25  | 1.32 |    |
| CS088  | 589021.08609644.0 | 4.07 | 0.004 | 0.010 | 12  | 27  | 5  | 8   | 131  | 10  | 4  | 0.54  | 0.04 |    |
| CS091  | 588342.08604384.0 | 3.97 | 0.016 | 0.010 | 51  | 47  | 2  | 11  | 21   | 7   | 4  | 2.26  | 0.13 |    |
| CS096  | 590360.08601064.0 | 3.98 | 0.004 | 0.020 | 41  | 81  | 2  | 36  | 42   | 6   | 4  | 0.94  | 0.19 |    |
| CS101  | 592799.08608046.0 | 3.99 | 0.013 | 0.020 | 20  | 51  | 5  | 27  | 39   | 13  | 13 | 0.55  | 0.04 |    |
| CS106  | 594903.08611208.0 | 4.59 | 0.023 | 0.050 | 13  | 153 | 2  | 86  | 63   | 33  | 60 | 2.58  | 1.29 |    |
| CS110  | 591405.08617442.0 | 6.31 | 0.017 | 0.350 | 56  | 54  | 50 | 24  | 1560 | 33  | 4  | 2.50  | 1.26 |    |
| IB006  | 657975.18581427.7 | 4.15 | 0.00  | 0.012 | 4   | 25  | 2  | 8   | 23   | 42  | 4  | 0.54  | 0.04 |    |
| IB019  | 642894.48575625.2 | 3.96 | 0.01  | 0.012 | 31  | 33  | 5  | 8   | 43   | 26  | 4  | 1.53  | 0.04 |    |
| IB020  | 636795.58588465.1 | 4.50 | 0.00  | 0.013 | 58  | 132 | 15 | 28  | 114  | 30  | 4  | 3.86  | 0.04 |    |
| IK013  | 645171.08573458.0 | 5.16 | 0.00  | 0.082 | 208 | 93  | 22 | 16  | 57   | 185 | 4  | 7.31  | 0.72 |    |
| IK024  | 646328.08583153.0 | 4.12 | 0.00  | 0.020 | 34  | 42  | 6  | 12  | 19   | 54  | 10 | 1.63  | 0.04 |    |
| IM001  | 659016.88564021.9 | 3.94 | 0.00  | 0.017 | 23  | 41  | 2  | 12  | 19   | 12  | 4  | 1.36  | 0.04 |    |
| IM010  | 661360.68571305.8 | 4.04 | 0.00  | 0.018 | 37  | 35  | 5  | 12  | 27   | 13  | 4  | 1.37  | 0.04 |    |
| IM014  | 650175.78567906.3 | 4.28 | 0.00  | 0.025 | 30  | 42  | 6  | 13  | 41   | 11  | 4  | 1.49  | 0.04 |    |
| IM020  | 658724.68587132.2 | 4.09 | 0.01  | 0.022 | 25  | 29  | 6  | 10  | 22   | 12  | 4  | 1.38  | 0.04 |    |
| KA006  | 634620.08586508.3 | 4.24 | 0.013 | 0.024 | 42  | 81  | 7  | 30  | 26   | 12  | 4  | 2.930 | 0.88 |    |
| KA041  | 631994.68577669.7 | 4.29 | 0.013 | 0.084 | 47  | 30  | 2  | 6   | 37   | 5   | 4  | 1.960 | 0.46 |    |
| KA046  | 630580.68581461.9 | 5.47 | 0.007 | 0.021 | 38  | 37  | 5  | 6   | 46   | 13  | 4  | 1.900 | 0.52 |    |
| KA060  | 624265.68581295.6 | 7.12 | 0.029 | 0.332 | 36  | 34  | 29 | 9   | 656  | 144 | 31 | 1.730 | 0.97 |    |
| KA068  | 620381.68589822.0 | 4.66 | 0.023 | 0.098 | 125 | 54  | 7  | 13  | 38   | 12  | 4  | 5.320 | 0.28 |    |
| KB004  | 631082.18573668.0 | 4.41 | 0.012 | 0.052 | 104 | 119 | 5  | 66  | 63   | 7   | 4  | 2.510 | 0.58 |    |
| KB009  | 628465.48571234.6 | 4.06 | 0.013 | 0.037 | 37  | 36  | 2  | 14  | 29   | 7   | 4  | 1.580 | 0.19 |    |
| KB015  | 626725.48565308.5 | 4.78 | 0.013 | 0.066 | 73  | 94  | 15 | 35  | 25   | 9   | 12 | 4.620 | 1.11 |    |
| KB023  | 622404.88568807.2 | 4.21 | 0.008 | 0.047 | 23  | 96  | 2  | 59  | 25   | 10  | 4  | 1.500 | 0.70 |    |
| KB029  | 618967.48573151.3 | 4.21 | 0.020 | 0.066 | 55  | 33  | 10 | 12  | 51   | 6   | 4  | 1.890 | 0.04 |    |
| KB035  | 615620.28571557.0 | 4.20 | 0.019 | 0.046 | 102 | 33  | 14 | 11  | 57   | 8   | 4  | 3.810 | 1.05 |    |
| KB038  | 615151.78565586.2 | 4.00 | 0.002 | 0.034 | 28  | 28  | 5  | 16  | 59   | 4   | 4  | 0.470 | 0.13 |    |
| KB045  | 618938.08578221.2 | 4.07 | 0.014 | 0.044 | 20  | 27  | 5  | 12  | 17   | 7   | 4  | 0.680 | 0.23 |    |

|       |                   |      |       |       |     |     |     |    |     |     |     |        |       |
|-------|-------------------|------|-------|-------|-----|-----|-----|----|-----|-----|-----|--------|-------|
| KB051 | 613639.68570262.5 | 6.06 | 0.007 | 0.017 | 112 | 54  | 8   | 16 | 34  | 10  | 4   | 4.290  | 1.23  |
| KB054 | 610212.88570379.3 | 4.35 | 0.014 | 0.041 | 85  | 52  | 12  | 20 | 54  | 7   | 4   | 3.040  | 0.46  |
| KB060 | 613416.48575334.4 | 4.18 | 0.015 | 0.034 | 66  | 37  | 6   | 13 | 27  | 7   | 4   | 3.030  | 0.15  |
| KB061 | 613315.48573705.1 | 4.81 | 0.025 | 0.074 | 101 | 43  | 14  | 16 | 34  | 5   | 4   | 3.910  | 0.11  |
| KB067 | 609397.28582505.9 | 5.71 | 0.007 | 0.079 | 191 | 112 | 12  | 20 | 65  | 18  | 4   | 12.460 | 0.42  |
| KB072 | 616128.98578278.8 | 4.06 | 0.016 | 0.021 | 39  | 50  | 5   | 18 | 16  | 6   | 4   | 1.690  | 0.25  |
| KB075 | 616937.18584136.9 | 4.77 | 0.018 | 0.039 | 74  | 41  | 9   | 16 | 29  | 6   | 4   | 2.420  | 0.04  |
| KB076 | 615660.18584003.9 | 4.51 | 0.020 | 0.047 | 116 | 128 | 47  | 36 | 87  | 13  | 4   | 5.280  | 4.10  |
| KB078 | 615092.18585681.5 | 4.82 | 0.014 | 0.067 | 128 | 103 | 22  | 21 | 54  | 9   | 11  | 6.050  | 5.97  |
| KB092 | 623947.78576828.5 | 4.15 | 0.021 | 0.021 | 44  | 55  | 14  | 11 | 32  | 11  | 4   | 1.900  | 0.11  |
| KB096 | 621820.78578765.1 | 4.42 | 0.020 | 0.021 | 54  | 32  | 8   | 5  | 25  | 12  | 4   | 2.210  | 0.32  |
| KV002 | 632223.08570158.0 | 4.42 | 0.013 | 0.037 | 84  | 149 | 6   | 52 | 78  | 9   | 13  | 5.310  | 2.39  |
| KV004 | 631228.08567407.0 | 4.09 | 0.009 | 0.016 | 19  | 38  | 2   | 13 | 25  | 6   | 4   | 1.130  | 0.47  |
| KV011 | 617344.08587107.0 | 4.89 | 0.009 | 0.069 | 205 | 179 | 14  | 28 | 49  | 28  | 24  | 9.000  | 13.71 |
| KV032 | 623680.08583049.0 | 4.97 | 0.019 | 0.050 | 182 | 95  | 65  | 46 | 49  | 9   | 4   | 7.360  | 0.30  |
| LK003 | 646533.88556262.2 | 4.87 | 0.013 | 0.004 | 53  | 35  | 17  | 11 | 276 | 35  | 13  | 1.84   | 0.37  |
| LK010 | 647290.58551797.4 | 4.62 | 0.004 | 0.004 | 19  | 21  | 5   | 9  | 22  | 19  | 4   | 0.60   | 0.04  |
| LK011 | 643881.58553963.8 | 5.03 | 0.011 | 0.004 | 87  | 124 | 144 | 36 | 172 | 39  | 20  | 3.81   | 2.74  |
| LK028 | 647556.58548310.9 | 5.23 | 0.004 | 0.004 | 70  | 99  | 14  | 29 | 206 | 56  | 4   | 3.09   | 0.04  |
| LK031 | 650171.28547768.8 | 5.01 | 0.004 | 0.004 | 37  | 56  | 13  | 31 | 659 | 54  | 4   | 1.58   | 0.04  |
| LM004 | 659255.28561474.3 | 4.64 | 0.011 | 0.004 | 30  | 52  | 2   | 13 | 15  | 9   | 4   | 1.87   | 0.11  |
| LM010 | 654757.48552176.7 | 4.94 | 0.013 | 0.004 | 52  | 68  | 12  | 35 | 149 | 21  | 4   | 1.83   | 0.04  |
| LM016 | 661785.58545462.6 | 5.21 | 0.004 | 0.004 | 43  | 94  | 5   | 15 | 31  | 16  | 15  | 1.94   | 0.04  |
| LM035 | 644411.48545289.8 | 4.70 | 0.004 | 0.012 | 33  | 26  | 8   | 16 | 28  | 55  | 4   | 1.37   | 0.04  |
| LM043 | 639075.88537291.2 | 4.60 | 0.004 | 0.004 | 27  | 35  | 5   | 16 | 23  | 37  | 4   | 1.05   | 0.04  |
| LM046 | 635951.88544605.6 | 4.87 | 0.030 | 0.004 | 105 | 178 | 9   | 47 | 28  | 67  | 24  | 4.95   | 1.96  |
| LM054 | 636591.8552945.1  | 4.71 | 0.004 | 0.004 | 23  | 17  | 8   | 2  | 11  | 13  | 4   | 1.09   | 0.31  |
| LZ018 | 652323.98535938.3 | 4.90 | 0.004 | 0.010 | 245 | 203 | 91  | 50 | 105 | 30  | 87  | 8.27   | 1.09  |
| LZ031 | 641285.28561087.7 | 4.92 | 0.010 | 0.004 | 81  | 124 | 7   | 20 | 77  | 8   | 12  | 5.87   | 0.51  |
| MA002 | 641889.08619440.4 | 4.10 | 0.004 | 0.059 | 35  | 30  | 2   | 7  | 30  | 12  | 10  | 1.810  | 4.99  |
| MA003 | 644053.98622236.8 | 4.15 | 0.011 | 0.059 | 66  | 35  | 6   | 10 | 20  | 18  | 21  | 2.470  | 17.35 |
| MA008 | 649680.28620235.2 | 4.15 | 0.004 | 0.054 | 32  | 23  | 2   | 6  | 33  | 12  | 12  | 1.310  | 1.87  |
| MB011 | 644387.48619356.1 | 4.26 | 0.004 | 0.038 | 32  | 22  | 2   | 6  | 13  | 13  | 10  | 1.320  | 2.25  |
| MB014 | 644511.48625213.4 | 4.13 | 0.004 | 0.062 | 59  | 54  | 2   | 12 | 88  | 12  | 11  | 2.360  | 3.30  |
| MB022 | 636522.68618742.6 | 4.45 | 0.004 | 0.085 | 176 | 144 | 5   | 12 | 30  | 17  | 20  | 7.820  | 21.84 |
| MV005 | 636884.28621359.4 | 4.16 | 0.004 | 0.047 | 95  | 53  | 2   | 2  | 28  | 15  | 13  | 3.730  | 1.64  |
| NB004 | 668235.8565240.0  | 5.14 | 0.004 | 0.081 | 157 | 56  | 33  | 25 | 33  | 23  | 91  | 4.48   | 6.86  |
| NI003 | 676916.28577357.5 | 7.27 | 0.029 | 0.188 | 122 | 50  | 12  | 19 | 27  | 48  | 30  | 4.33   | 7.29  |
| NI005 | 682625.78579125.5 | 4.57 | 0.004 | 0.004 | 131 | 110 | 5   | 22 | 44  | 35  | 28  | 6.6    | 50.14 |
| NI014 | 685851.8574206.6  | 4.42 | 0.004 | 0.004 | 64  | 66  | 7   | 22 | 25  | 52  | 23  | 4.7    | 5.36  |
| NI019 | 679748.18571090.4 | 4.44 | 0.012 | 0.026 | 108 | 34  | 6   | 9  | 22  | 168 | 262 | 3.37   | 3.31  |
| NV001 | 663176.88582168.0 | 4.55 | 0.013 | 0.004 | 34  | 32  | 7   | 13 | 63  | 12  | 10  | 1.11   | 0.04  |
| NV009 | 668420.88574355.5 | 4.58 | 0.004 | 0.004 | 18  | 14  | 2   | 7  | 41  | 12  | 4   | 0.3    | 0.04  |
| NV026 | 668395.48562801.7 | 4.89 | 0.020 | 0.016 | 52  | 35  | 12  | 15 | 20  | 10  | 11  | 1.66   | 0.04  |
| NV047 | 678869.98562968.3 | 5.43 | 0.004 | 0.004 | 78  | 45  | 15  | 41 | 25  | 6   | 4   | 1.87   | 0.52  |
| NV052 | 672341.18572513.4 | 4.59 | 0.004 | 0.004 | 35  | 26  | 2   | 9  | 13  | 12  | 4   | 1.17   | 0.04  |
| RB001 | 646155.28617566.1 | 4.13 | 0.00  | 0.027 | 17  | 23  | 2   | 7  | 6   | 17  | 10  | 0.49   | 0.19  |
| RB006 | 654385.08609629.5 | 3.96 | 0.00  | 0.047 | 102 | 64  | 6   | 13 | 23  | 82  | 17  | 3.44   | 5.71  |
| RB014 | 659796.18599368.1 | 4.37 | 0.00  | 0.106 | 330 | 155 | 21  | 21 | 45  | 68  | 67  | 13.1   | 33.2  |
| RB015 | 658536.88597207.6 | 4.34 | 0.00  | 0.075 | 106 | 111 | 12  | 27 | 31  | 94  | 64  | 8.44   | 2.04  |
| RB016 | 654116.48601805.7 | 3.98 | 0.00  | 0.024 | 39  | 49  | 2   | 12 | 19  | 45  | 12  | 1.9    | 0.68  |
| RB027 | 638092.98613428.0 | 4.02 | 0.02  | 0.029 | 89  | 63  | 2   | 11 | 25  | 68  | 4   | 3.75   | 1.96  |
| RM002 | 657603.08593066.6 | 4.04 | 0.00  | 0.022 | 50  | 61  | 2   | 14 | 23  | 11  | 4   | 2.99   | 0.72  |
| RM004 | 649925.68593467.6 | 4.52 | 0.00  | 0.004 | 71  | 167 | 9   | 31 | 28  | 25  | 4   | 6.66   | 1.45  |
| RM007 | 646864.88604435.0 | 4.05 | 0.00  | 0.023 | 30  | 47  | 2   | 9  | 15  | 12  | 4   | 1.85   | 0.04  |
| RM028 | 641159.08609615.5 | 3.93 | 0.02  | 0.020 | 44  | 41  | 2   | 8  | 10  | 9   | 4   | 2.04   | 0.34  |
| RM031 | 643367.28601052.5 | 4.07 | 0.01  | 0.023 | 50  | 49  | 2   | 17 | 12  | 9   | 4   | 1.67   | 0.15  |
| SA010 | 617003.28618972.2 | 4.41 | 0.012 | 0.076 | 110 | 99  | 48  | 49 | 142 | 34  | 10  | 4.500  | 0.26  |
| SA018 | 622262.68624209.2 | 4.32 | 0.004 | 0.054 | 67  | 120 | 8   | 18 | 32  | 11  | 2   | 3.160  | 0.56  |
| SA023 | 626744.58620418.9 | 4.25 | 0.004 | 0.056 | 33  | 26  | 2   | 7  | 170 | 21  | 2   | 1.410  | 1.51  |
| SB030 | 626204.68620692.6 | 4.55 | 0.004 | 0.066 | 130 | 57  | 7   | 13 | 68  | 15  | 15  | 4.980  | 0.59  |
| SB033 | 621849.88624765.4 | 4.11 | 0.004 | 0.018 | 25  | 64  | 2   | 36 | 20  | 6   | 2   | 1.090  | 0.33  |
| SB044 | 614948.08622940.3 | 4.32 | 0.004 | 0.026 | 28  | 43  | 10  | 15 | 39  | 11  | 2   | 1.080  | 0.04  |
| SB049 | 609913.58627964.6 | 4.27 | 0.004 | 0.041 | 50  | 31  | 6   | 10 | 43  | 8   | 10  | 1.730  | 0.18  |
| SB053 | 624195.08624124.4 | 4.14 | 0.004 | 0.023 | 48  | 36  | 2   | 7  | 49  | 9   | 10  | 2.150  | 1.71  |
| SB055 | 626905.08623654.4 | 4.50 | 0.004 | 0.046 | 113 | 78  | 9   | 27 | 22  | 6   | 14  | 2.590  | 4.25  |
| SB057 | 629929.68619743.2 | 4.14 | 0.014 | 0.038 | 43  | 47  | 2   | 10 | 27  | 10  | 2   | 3.920  | 0.04  |
| SB058 | 628065.28621691.5 | 4.16 | 0.004 | 0.057 | 93  | 92  | 2   | 16 | 29  | 20  | 12  | 7.680  | 0.50  |
| SV004 | 635365.08621215.4 | 4.21 | 0.004 | 0.026 | 102 | 94  | 2   | 7  | 26  | 13  | 16  | 4.740  | 8.74  |
| SV022 | 633992.98625057.4 | 4.43 | 0.004 | 0.065 | 175 | 166 | 7   | 23 | 32  | 18  | 22  | 8.220  | 26.36 |
| SV025 | 630864.78618187.9 | 4.17 | 0.018 | 0.051 | 124 | 62  | 2   | 11 | 40  | 14  | 11  | 5.650  | 3.07  |

|        |                   |      |       |       |      |     |     |     |      |     |     |       |       |
|--------|-------------------|------|-------|-------|------|-----|-----|-----|------|-----|-----|-------|-------|
| SV027  | 620655.08620959.0 | 4.33 | 0.011 | 0.054 | 52   | 60  | 18  | 26  | 35   | 13  | 26  | 2.360 | 0.80  |
| SV032  | 628006.58628221.7 | 4.21 | 0.004 | 0.026 | 81   | 60  | 19  | 22  | 63   | 24  | 14  | 3.160 | 6.02  |
| UB001  | 610803.08601626.0 | 4.06 | 0.038 | 0.080 | 100  | 52  | 6   | 10  | 49   | 20  | 4   | 4.44  | 0.74  |
| UB004  | 610957.08598531.0 | 4.94 | 0.006 | 0.120 | 194  | 128 | 11  | 23  | 42   | 29  | 19  | 8.84  | 7.34  |
| UB006  | 610979.08595270.0 | 5.20 | 0.014 | 0.080 | 104  | 68  | 11  | 18  | 43   | 20  | 4   | 6.54  | 0.24  |
| UB009  | 608737.08592502.0 | 4.50 | 0.028 | 0.160 | 174  | 51  | 36  | 27  | 68   | 7   | 11  | 6.01  | 0.17  |
| UB039  | 614009.08607292.0 | 5.12 | 0.024 | 0.070 | 95   | 68  | 9   | 12  | 37   | 10  | 4   | 3.54  | 0.04  |
| UB045  | 615746.08604972.0 | 4.18 | 0.019 | 0.060 | 35   | 39  | 2   | 15  | 23   | 4   | 4   | 1.65  | 0.04  |
| UB049  | 619590.08604995.0 | 4.26 | 0.013 | 0.040 | 32   | 49  | 2   | 7   | 41   | 7   | 4   | 2.52  | 0.04  |
| UB065  | 631875.08614929.0 | 4.76 | 0.035 | 0.100 | 73   | 49  | 11  | 16  | 176  | 56  | 18  | 4.79  | 0.23  |
| UB070  | 626885.08617888.0 | 4.14 | 0.013 | 0.040 | 40   | 34  | 6   | 13  | 101  | 13  | 4   | 1.64  | 0.04  |
| UB076  | 628701.08615757.0 | 4.97 | 0.012 | 0.040 | 49   | 104 | 15  | 11  | 84   | 20  | 16  | 3.38  | 0.04  |
| UB077  | 627850.08612991.0 | 4.36 | 0.016 | 0.040 | 39   | 69  | 10  | 10  | 47   | 25  | 4   | 2.71  | 0.32  |
| UB082  | 626794.08609877.0 | 4.51 | 0.018 | 0.040 | 35   | 53  | 5   | 11  | 36   | 20  | 4   | 2.51  | 0.19  |
| UB087  | 634733.08617890.0 | 4.32 | 0.014 | 0.040 | 101  | 64  | 2   | 7   | 47   | 17  | 14  | 4.55  | 10.54 |
| UJ046  | 627676.08601515.0 | 4.50 | 0.007 | 0.070 | 29   | 34  | 2   | 17  | 32   | 21  | 4   | 1.48  | 0.04  |
| UJ049  | 631811.08601114.0 | 4.32 | 0.019 | 0.060 | 35   | 20  | 2   | 9   | 21   | 21  | 4   | 1.44  | 0.04  |
| UJ056  | 629723.08606422.0 | 4.58 | 0.012 | 0.040 | 6    | 33  | 2   | 8   | 14   | 16  | 4   | 1.87  | 0.35  |
| UJ057  | 630343.08608380.0 | 4.48 | 0.013 | 0.050 | 35   | 79  | 6   | 17  | 79   | 20  | 4   | 4.50  | 0.04  |
| UJ062  | 635481.08608144.0 | 4.11 | 0.025 | 0.050 | 31   | 33  | 2   | 18  | 17   | 36  | 11  | 1.41  | 0.18  |
| UJ068  | 614736.08611024.0 | 4.33 | 0.007 | 0.060 | 32   | 45  | 2   | 11  | 40   | 25  | 14  | 2.17  | 0.45  |
| UJ071  | 616477.08613512.0 | 4.32 | 0.022 | 0.070 | 92   | 60  | 32  | 21  | 110  | 44  | 10  | 3.08  | 0.25  |
| UJ085  | 620101.08611754.0 | 4.57 | 0.019 | 0.090 | 17   | 28  | 5   | 2   | 23   | 11  | 4   | 2.18  | 0.04  |
| WI007  | 684478.98560858.3 | 4.68 | 0.004 | 0.004 | 135  | 37  | 7   | 9   | 19   | 19  | 17  | 4.77  | 0.52  |
| WI011  | 680168.38552914.7 | 5.73 | 0.004 | 0.041 | 65   | 160 | 47  | 58  | 33   | 46  | 14  | 2.50  | 0.04  |
| WI020  | 675728.18560274.5 | 4.50 | 0.004 | 0.004 | 64   | 40  | 2   | 2   | 13   | 9   | 4   | 2.49  | 0.88  |
| WI027  | 663274.28559879.6 | 4.59 | 0.013 | 0.004 | 62   | 46  | 5   | 9   | 12   | 12  | 4   | 2.23  | 0.04  |
| WM003  | 673307.08550083.2 | 4.90 | 0.020 | 0.004 | 62   | 33  | 11  | 30  | 38   | 27  | 4   | 2.19  | 0.04  |
| WM009  | 675054.08540257.3 | 4.67 | 0.012 | 0.004 | 60   | 23  | 8   | 13  | 41   | 22  | 4   | 2.13  | 0.04  |
| WM012  | 679948.48535698.4 | 4.92 | 0.012 | 0.004 | 69   | 34  | 9   | 20  | 36   | 27  | 4   | 2.82  | 0.22  |
| WV004  | 688888.48550131.6 | 4.43 | 0.021 | 0.004 | 70   | 60  | 11  | 21  | 22   | 17  | 13  | 2.14  | 0.11  |
| WV009  | 684360.98544124.6 | 4.97 | 0.004 | 0.004 | 115  | 63  | 23  | 25  | 58   | 15  | 4   | 4.16  | 1.90  |
| WZ010  | 667439.18547888.3 | 4.54 | 0.004 | 0.004 | 32   | 28  | 2   | 10  | 18   | 17  | 4   | 1.32  | 0.04  |
| WZ014  | 668189.68552442.7 | 4.92 | 0.004 | 0.004 | 78   | 67  | 10  | 37  | 30   | 27  | 11  | 2.57  | 0.27  |
| WZ020  | 668341.88540674.1 | 4.96 | 0.004 | 0.004 | 109  | 124 | 15  | 45  | 36   | 40  | 35  | 4.62  | 0.77  |
| WZ023  | 662878.48537396.0 | 4.68 | 0.004 | 0.004 | 44   | 26  | 6   | 18  | 30   | 19  | 4   | 1.65  | 0.04  |
| Max    |                   | 7.27 | 0.038 | 0.350 | 330  | 256 | 144 | 132 | 1560 | 185 | 262 | 13.10 | 50.14 |
| Median |                   | 4.37 | 0.010 | 0.038 | 58.5 | 53  | 6   | 16  | 33   | 16  | 4   | 2.50  | 0.40  |
| Min    |                   | 3.91 | 0.002 | 0.004 | 4    | 14  | 2   | 2   | 6    | 4   | 2   | 0.30  | 0.04  |

**Table S3.** The pH values and concentration of selected elements in the water of the Kafue River catchment. Concentrations of Ca, Mg and Fe in mg/L, other elements in µg/L, filtered water. Field campaign 2008 and 2009. Explanation: Sampling sites description: **Kafue River:** 1 Kafue River, inflow to the Copperbelt industrial area (reference point of the non-contaminated Kafue River), 4 Kafue River, after junction with contaminated Mushishima and Chililabombwe rivers, 6 Kafue River, after passing through the Chingola industrial area, 8. Kafue River, after junction with the Mufulira River, 10 Kafue River, middle stretch, 12Kafue River, middle stream, 17. Kafue River after passing the Kitwe industrial area, 18. Kafue River, outflow from the industrial Copperbelt area. **Kafue tributaries:** 2. Lubengele River, tributary of the Kafue River from the Chililabombwe industrial area, 3. Mushishima River polluted with washed-out material from old flotation tailings south of Chingola re-mined through chemical leaching plant, 5 Changa River, contaminated with overflow from the Chingola KCM thickeners, 7 Mufulira River, tributary to the Kafue River from an area of large tailing ponds south of Mufulira, 9 Musakashi River, tributary to the Kafue River from an area of large tailing ponds north of Chambishi Town, 11 Mbabwashi River, tributary to Kafue River from an area of large tailing ponds south of Chambishi Town, 13 Mindolo River, tributary to the Kafue River from an area of tailing ponds of the Mindolo mine, 14 Kitwe River, flowing through waste dumps area west of Kitwe, 15 Uchi River polluted with industrial water released from the Nkana Smelter and Chemical Plant, 16. Wusakile River, tributary to the Kafue River from an area of the Nkana Industrial Complex.

| Variables | Sampling Sites - Kafue River -Water |      |       |       |      |      |      |      |      | Sampling Sites Kafue Tributaries - Water |       |       |      |      |      |      |      |       |      |
|-----------|-------------------------------------|------|-------|-------|------|------|------|------|------|------------------------------------------|-------|-------|------|------|------|------|------|-------|------|
|           | Field Campaign                      | 1    | 4     | 6     | 8    | 10   | 12   | 17   | 18   | 2                                        | 3     | 5     | 7    | 9    | 11   | 13   | 14   | 15    | 16   |
| pH        | 2008                                | 6.37 | 6.85  | 6.95  | 6.67 | 6.5  | 6.92 | 6.36 | 6.4  | 6.67                                     | 6.65  | 6.79  | 6.37 | 6.34 | 6.57 | 6.79 | 6.66 | 6.28  | 6.5  |
| pH        | 2009                                | 6.78 | 7.03  | 6.97  | 6.93 | 7.2  | 6.96 | 7.25 | 7.21 | 7.05                                     | 5.8   | 7.21  | 6.93 | 6.91 | 7.31 | 6.93 | 7.25 | 7.13  | 7.43 |
| Al (µg/L) | 2008                                | 5    | 16    | 21    | 13   | 13   | 14   | 17   | 20   | 28                                       | 14    | 23    | 3    | 3    | 15   | 8    | 12   | 35    | 4    |
| Al (µg/L) | 2009                                | 4    | 16    | 16    | 11   | 10   | 12   | 11   | 21   | 26                                       | 237   | 18    | 5    | 3    | 8    | 18   | 9    | 6     | 6    |
| As (µg/L) | 2008                                | <.5  | <.5   | <.5   | <.5  | <.5  | <.5  | 0.5  | 0.8  | <.5                                      | <.5   | <.5   | <.5  | <.5  | <.5  | <.5  | <.5  | 6.7   | 0.6  |
| As (µg/L) | 2009                                | <0.5 | 0.5   | <0.5  | <0.5 | <0.5 | <0.5 | 0.5  | 0.5  | 0.5                                      | 2.9   | 0.6   | 1    | 1.5  | 0.8  | 1    | <0.5 | 2.6   | 1.2  |
| Ba (µg/L) | 2008                                | 14.6 | 35.2  | 44.8  | 41.3 | 39.9 | 34.9 | 33.5 | 33.3 | 57.8                                     | 47.2  | 76.1  | 39   | 41   | 22.4 | 46.9 | 34.9 | 52.6  | 136  |
| Ba (µg/L) | 2009                                | 16.1 | 37.6  | 49.1  | 47.7 | 49.2 | 44.4 | 45   | 42.7 | 43.6                                     | 84.5  | 78.3  | 50.5 | 40.1 | 22.8 | 51.1 | 47.6 | 49.9  | 169  |
| Ca(mg/L)  | 2008                                | 14   | 21    | 23    | 36   | 29   | 35   | 36   | 37   | 23                                       | 34    | 26    | 138  | 162  | 76   | 151  | 35   | 254   | 69   |
| Ca(mg/L)  | 2009                                | 14   | 25    | 27    | 29   | 33   | 30   | 35   | 34   | 21                                       | 317   | 34    | 148  | 105  | 66   | 156  | 36   | 231   | 67   |
| Co (µg/L) | 2008                                | <.5  | 7     | 9     | 6    | 4    | 5    | 26   | 33   | 4                                        | 14    | 41    | 2    | 3    | 24   | 16   | 7    | 1571  | 15   |
| Co (µg/L) | 2009                                | <.5  | 17    | 30    | 13   | 21   | 10   | 24   | 19   | 8                                        | 5824  | 53    | 1    | 4    | 3    | 23   | 12   | 2262  | 11   |
| Cu (µg/L) | 2008                                | 4.6  | 87.5  | 101.8 | 79.6 | 80.6 | 56.4 | 47.4 | 65.7 | 28.4                                     | 102.9 | 154.8 | 12   | 3.2  | 6.3  | 5.5  | 46.2 | 157.3 | 52.6 |
| Cu (µg/L) | 2009                                | 2.4  | 106.9 | 107.1 | 89.2 | 79.3 | 86.8 | 38.2 | 38.9 | 49.1                                     | 29400 | 175.4 | 13.9 | 4.4  | 3.8  | 2.6  | 48.2 | 33.5  | 32.3 |
| Mg(mg/L)  | 2008                                | 7    | 9     | 9     | 12   | 11   | 14   | 15   | 15   | 11                                       | 13    | 13    | 41   | 10   | 45   | 41   | 14   | 156   | 15   |
| Mg(mg/L)  | 2009                                | 7    | 10    | 11    | 11   | 12   | 13   | 15   | 14   | 10                                       | 105   | 16    | 44   | 8    | 34   | 42   | 14   | 138   | 14   |
| Mg(mg/L)  | 2009                                | 7    | 10    | 11    | 11   | 12   | 13   | 15   | 14   | 72                                       | 223   | 364   | 289  | 34   | 46   | 179  | 116  | 2344  | 156  |
| Mn (µg/L) | 2008                                | 6    | 83    | 157   | 177  | 149  | 117  | 136  | 147  | 85                                       | 33976 | 294   | 221  | 50   | 27   | 196  | 236  | 2947  | 127  |
| Mn (µg/L) | 2009                                | 19   | 190   | 374   | 226  | 320  | 201  | 200  | 170  | 3.9                                      | 1.6   | 1     | 4    | 5.2  | 0.6  | 20.7 | 1    | 24.1  | 3.9  |
| Mo (µg/L) | 2008                                | <0.1 | 0.7   | 0.7   | 0.8  | 0.9  | 0.7  | 1    | 0.9  | 8.3                                      | 3.2   | 1     | 4.2  | 5.4  | 0.9  | 24.3 | 1.4  | 14    | 4.8  |
| Mo (µg/L) | 2009                                | 0.2  | 1.1   | 0.9   | 1    | 1.2  | 1    | 1.4  | 1.4  | <0.2                                     | <0.2  | 2.6   | 8.6  | <0.2 | 2    | <0.2 | 0.2  | 53.3  | 0.7  |

|           |      |      |      |      |      |      |      |      |      |       |       |       |       |       |       |       |      |        |       |
|-----------|------|------|------|------|------|------|------|------|------|-------|-------|-------|-------|-------|-------|-------|------|--------|-------|
| Ni (µg/L) | 2008 | <0.2 | <0.2 | <0.2 | 0.3  | 0.4  | 0.5  | 0.8  | 1.1  | <0.2  | 158.7 | 4.6   | 3     | <0.2  | <0.2  | <0.2  | 0.3  | 59.8   | 0.2   |
| Ni (µg/L) | 2009 | <0.2 | <0.2 | 0.5  | 0.3  | 0.65 | 0.8  | 0.5  | 0.5  | 0.3   | 2.1   | 0.4   | 0.9   | 0.1   | 0.6   | <0.1  | 0.5  | 0.5    | 0.1   |
| Pb (µg/L) | 2008 | 0.1  | 0.5  | 0.3  | 0.4  | 0.5  | 0.8  | 0.9  | 0.4  | 0.4   | 0.3   | 0.2   | 0.1   | 0.1   | 0.1   | 15.4  | 0.1  | <0.1   | 0.1   |
| Pb (µg/L) | 2009 | <0.1 | 0.7  | 0.2  | 0.2  | 0.15 | 0.2  | 0.1  | 0.1  | 1     | 1.5   | 3.9   | 1.2   | 0.7   | <0.5  | 5.4   | 0.5  | 24.9   | 4.5   |
| Se (µg/L) | 2008 | <0.5 | 0.5  |      | 0.6  | <0.5 | 0.5  | 0.6  | <0.5 | 1.2   | 5.7   | 4.7   | 1.1   | 2     | 0.7   | 5.5   | 0.9  | 17.4   | 2.9   |
| Se (µg/L) | 2009 | <0.5 | 0.7  | 0.8  | 0.6  | 0.9  | <0.5 | 1    | 0.9  | 2.59  | 0.26  | 1.28  | 2.43  | 0.46  | 0.37  | 18.8  | 1.1  | 4.75   | 2.65  |
| U (µg/L)  | 2008 | 0.02 | 1.1  | 1.06 | 1.29 | 1.21 | 0.92 | 1.01 | 1.05 | 5.87  | 10.44 | 1.56  | 3.62  | 0.4   | 0.34  | 19.54 | 1.84 | 13.79  | 2.78  |
| Zn (µg/L) | 2008 | 2    | 1.7  | 4.4  | 19.6 | 7.9  | 4.5  | 2.9  | 4.6  | 1.5   | 3.5   | 6.4   | 7.7   | 3.4   | 8.1   | 5.4   | 1.6  | 28.4   | 3.1   |
| Zn (µg/L) | 2009 | 1.4  | 4.3  | 4.8  | 11.4 | 4    | 9.6  | 2.6  | 2.6  | 4.5   | 503   | 20.1  | 10.9  | 2.5   | 2.9   | 5.3   | 2.8  | 25.5   | 2009  |
| SO4(mg/L) | 2008 | 0.15 | 15   | 14.6 | 36.1 | 8.58 | 38.8 | 75.1 | 75.5 | 23.37 | 87.15 | 38.34 | 235.3 | 352.5 | 168.6 | 368.6 | 66.9 | 1203.5 | 74.46 |
| SO4(mg/L) | 2009 | 1.9  | 72   | 42.7 | 53.6 | 64.4 | 65.3 | 89.5 | 83.4 | 40.6  | 1850  | 91.8  | 692   | 294   | 250   | 663   | 83.7 | 1630   | 63.6  |

**Table S4.** Concentrations of selected elements in sediments of the Kafue River catchment. Concentrations of S<sub>tot</sub>, CO<sub>2</sub> and Fe in wt.%, other elements in mg/kg. For the location of sampling sites see explanation to Table 3. Field campaign 2008 and 2009.

| Sampling Sites - Kafue River - Sediment |                | Sampling Sites - Kafue River Tributaries - Sediments |       |       |       |       |       |       |       |      |       |       |       |      |       |       |      |       |       |
|-----------------------------------------|----------------|------------------------------------------------------|-------|-------|-------|-------|-------|-------|-------|------|-------|-------|-------|------|-------|-------|------|-------|-------|
| Variable                                | Field Campaign | 1                                                    | 4     | 6     | 8     | 10    | 12    | 17    | 18    | 2    | 3     | 5     | 7     | 9    | 11    | 13    | 14   | 15    | 16    |
| S <sub>tot</sub> (wt.%)                 | 2008           | 0.075                                                | 0.164 | 0.106 | 0.094 | 0.109 | 0.045 | 0.366 | 0.104 | 0.04 | 0.099 | 0.152 | 0.163 | 0.06 | 0.094 | 0.106 | 0.2  | 0.675 | 0.277 |
| S <sub>tot</sub> (wt.%)                 | 2009           | 0.08                                                 | 0.14  | 0.06  | 0.07  | 0.62  | 0.05  | 0.17  | 0.15  | 0.05 | 0.09  | 0.44  | 0.5   | 0.22 | 0.09  | 1.27  | 0.11 | 1.24  | 0.31  |
| CO <sub>2</sub> (wt.%)                  | 2008           | 0                                                    | 1.17  | 0.27  | 1.14  | 0.42  | 0.4   | 1.46  | 4.32  | 0    | 0.59  | 1.11  | 0.76  | 0    | 0.01  | 0     | 0.58 | 5.54  | 6.78  |
| CO <sub>2</sub> (wt.%)                  | 2009           | 0                                                    | 0.47  | 0.22  | 0.99  | 0     | 0.01  | 3.1   | 3.64  | 0.01 | 0.49  | 3.52  | 1.76  | 0    | 0     | 0     | 0.28 | 6     | 6.47  |
| V (mg/kg)                               | 2008           | 122                                                  | 79    | 131   | 32    | 66    | 78    | 91    | 48    | 114  | 108   | 90    | 81    | 50   | 45    | 49    | 48   | 54    | 114   |
| V (mg/kg)                               | 2009           | 69                                                   | 121   | 144   | 56    | 67    | 95    | 70    | 60    | 128  | 79    | 35    | 69    | 39   | 23    | 73    | 31   | 62    | 126   |
| Cr (mg/kg)                              | 2008           | 81                                                   | 53    | 84    | 29    | 48    | 55    | 79    | 35    | 78   | 57    | 68    | 70    | 54   | 34    | 43    | 43   | 63    | 71    |
| Cr (mg/kg)                              | 2009           | 47                                                   | 74    | 76    | 38    | 90    | 76    | 59    | 45    | 79   | 47    | 29    | 68    | 47   | 27    | 82    | 42   | 62    | 84    |
| Co(mg/kg)                               | 2008           | 21                                                   | 334   | 437   | 131   | 252   | 394   | 1174  | 350   | 117  | 292   | 454   | 88    | 12   | 105   | 21    | 157  | 1017  | 779   |
| Co(mg/kg)                               | 2009           | 17                                                   | 357   | 396   | 197   | 193   | 184   | 749   | 731   | 104  | 225   | 517   | 188   | 152  | 34    | 114   | 141  | 1427  | 1342  |
| Ni (mg/kg)                              | 2008           | 36                                                   | 17    | 33    | 16    | 19    | 24    | 57    | 15    | 27   | 19    | 26    | 65    | 13   | 9     | 8     | 25   | 40    | 32    |
| Ni (mg/kg)                              | 2009           | 18                                                   | 13    | 32    | 26    | 15    | 34    | 39    | 31    | 33   | 14    | 7     | 186   | 13   | 8     | 27    | 18   | 52    | 70    |
| Cu(mg/kg)                               | 2008           | 161                                                  | 7805  | 8837  | 1667  | 4663  | 5226  | 6267  | 1520  | 1831 | 8113  | 10130 | 1854  | 74   | 90    | 134   | 1744 | 8630  | 5113  |
| Cu(mg/kg)                               | 2009           | 115                                                  | 7622  | 8890  | 2355  | 4876  | 5093  | 4250  | 3204  | 2006 | 5899  | 10200 | 2658  | 141  | 69    | 612   | 1878 | 19490 | 7520  |
| Zn(mg/kg)                               | 2008           | 80                                                   | 46    | 86    | 47    | 40    | 74    | 178   | 38    | 35   | 59    | 92    | 123   | 19   | 18    | 44    | 48   | 102   | 154   |
| Zn(mg/kg)                               | 2009           | 45                                                   | 69    | 69    | 49    | 36    | 55    | 116   | 73    | 33   | 49    | 37    | 170   | 30   | 13    | 176   | 41   | 283   | 104   |
| Pb(mg/kg)                               | 2008           | 13                                                   | 17    | 28    | 13    | 22    | 21    | 77    | 15    | 16   | 19    | 16    | 24    | 4    | 4     | 17    | 25   | 83    | 63    |
| Pb(mg/kg)                               | 2009           | 4                                                    | 39    | 37    | 16    | 17    | 21    | 54    | 34    | 23   | 31    | 4     | 29    | 4    | 4     | 62    | 33   | 160   | 57    |
| Fe (wt.%)                               | 2008           | 2.5                                                  | 2.17  | 3.82  | 1.22  | 2     | 2.78  | 3.61  | 1.73  | 2.64 | 2.17  | 3.09  | 2.67  | 1.44 | 1.6   | 1.48  | 1.47 | 2.68  | 3.42  |
| Fe (wt.%)                               | 2009           | 2.03                                                 | 2.63  | 3.83  | 1.63  | 3.3   | 3.99  | 3.17  | 2.36  | 2.59 | 1.89  | 1.98  | 3.66  | 2.62 | 0.97  | 3.46  | 1.63 | 3.9   | 3.87  |
| As(mg/kg)                               | 2008           | 0.57                                                 | 4.14  | 6.48  | 1.41  | 2.98  | 4.03  | 17.26 | 2.01  | 1.02 | 6.67  | 4.62  | 3.09  | 0.04 | 0.25  | 0.29  | 1.02 | 72.43 | 16.17 |

---

|           |      |       |       |       |       |       |       |       |       |       |       |       |       |       |       |       |       |                               |       |
|-----------|------|-------|-------|-------|-------|-------|-------|-------|-------|-------|-------|-------|-------|-------|-------|-------|-------|-------------------------------|-------|
| As(mg/kg) | 2009 | 0.14  | 7.42  | 6.43  | 1.97  | 3.98  | 4.58  | 7.47  | 5.52  | 1.02  | 6.42  | 11.83 | 5.47  | 0.6   | 0.04  | 1.88  | 1.02  | <sup>116.0</sup> <sub>6</sub> | 45.77 |
| Hg(mg/kg) | 2008 | 0.031 | 0.03  | 0.087 | 0.025 | 0.036 | 0.037 | 0.482 | 0.073 | 0.029 | 0.035 | 0.011 | 0.088 | 0.01  | 0.005 | 0.14  | 0.096 | 0.776                         | 0.095 |
| Hg(mg/kg) | 2009 | 0.021 | 0.064 | 0.051 | 0.031 | 0.03  | 0.054 | 0.226 | 0.143 | 0.048 | 0.029 | 0.017 | 0.125 | 0.015 | 0.007 | 1.132 | 0.078 | 0.344                         | 0.193 |
| Mn(mg/kg) | 2008 | 103   | 510   | 935   | 1295  | 792   | 1209  | 1423  | 1654  | 166   | 643   | 1512  | 2506  | 156   | 213   | 208   | 421   | 1616                          | 1618  |
| Mn(mg/kg) | 2009 | 131   | 523   | 1000  | 2671  | 889   | 395   | 2170  | 2849  | 190   | 431   | 648   | 13790 | 643   | 220   | 302   | 841   | 1889                          | 2218  |

---

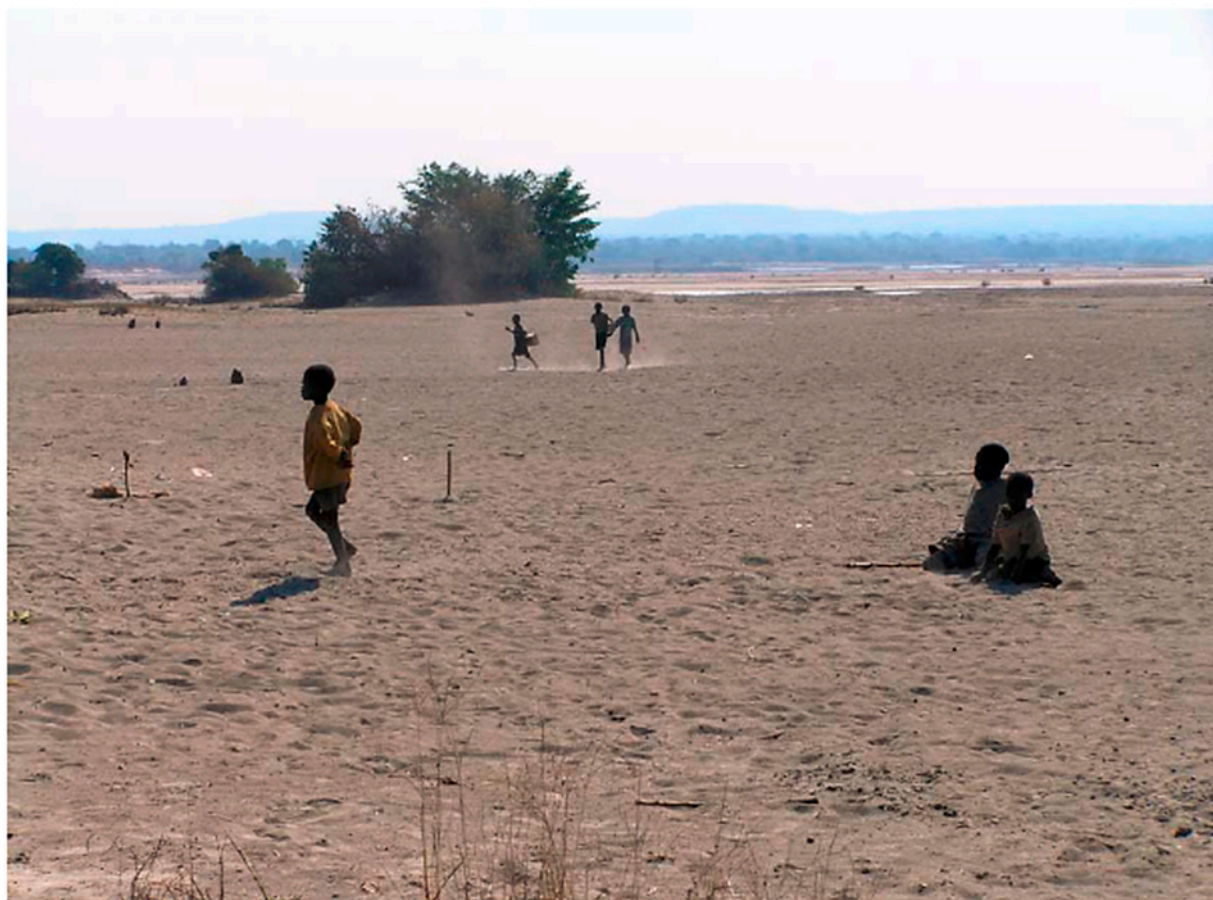

**Figure S2.** Dry beaches of tailings ponds are in many places used as a playground for children. It is therefore necessary to restrict access to tailings ponds at ore treatment plants and ensure their security, especially in the vicinity of urban agglomerations. The Lubengele tailings pond. Photo by Bohdan Křibek.
